# Supplementary material for: Asymmetric Ti-crossed Claisen condensation: application to concise asymmetric total synthesis of alternaric acid
Source: Royal Society of Chemistry journal article supplement (doi:10.1039/c3cc43180k), 2013-01-01

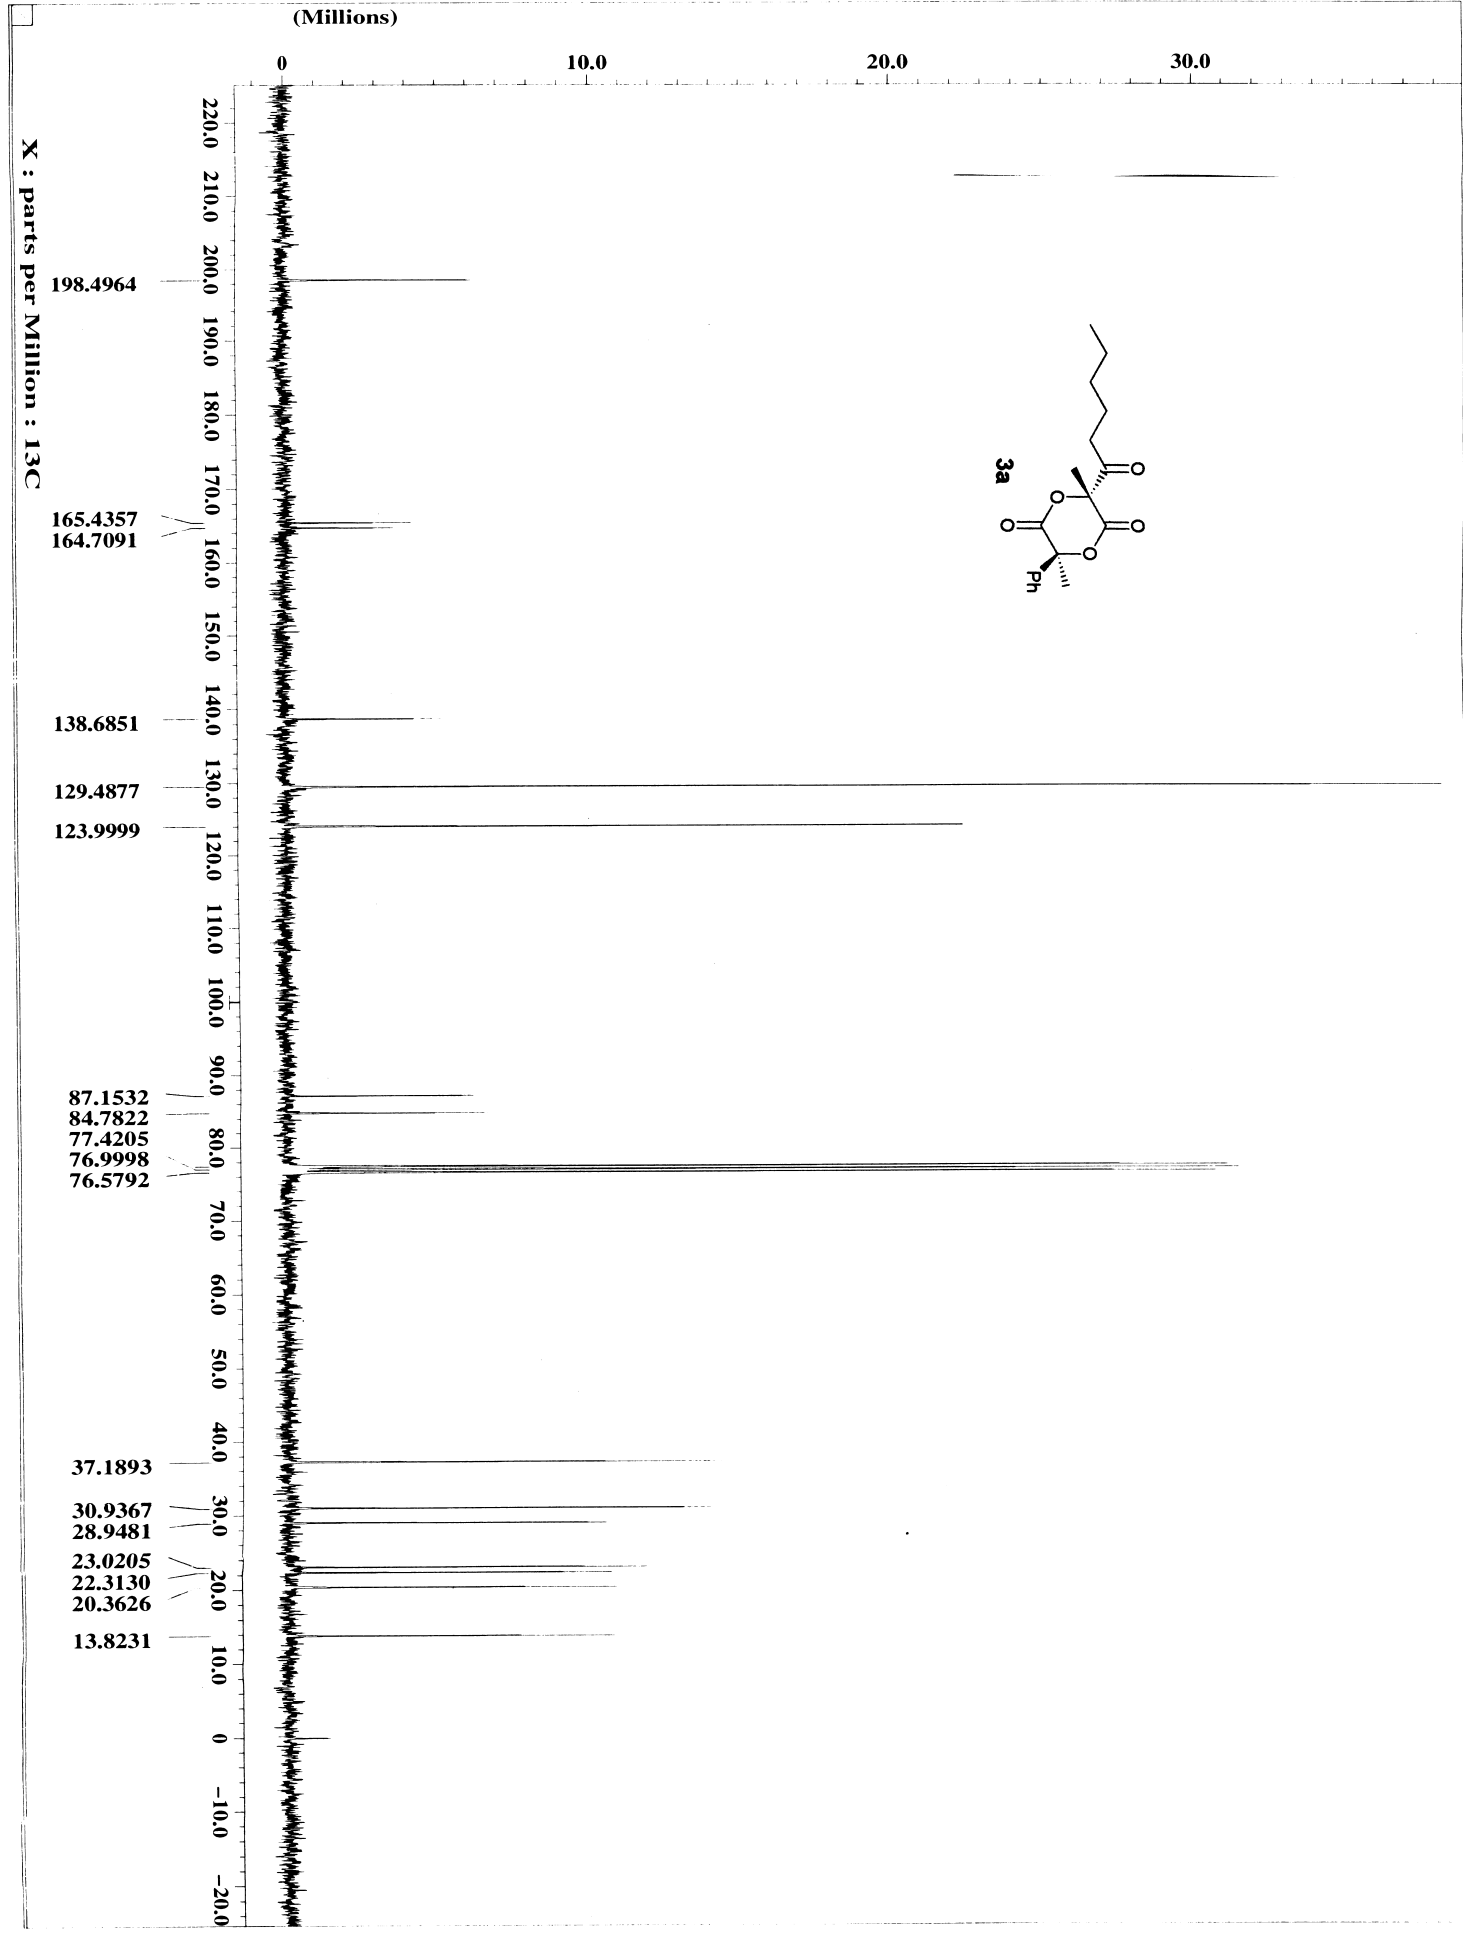

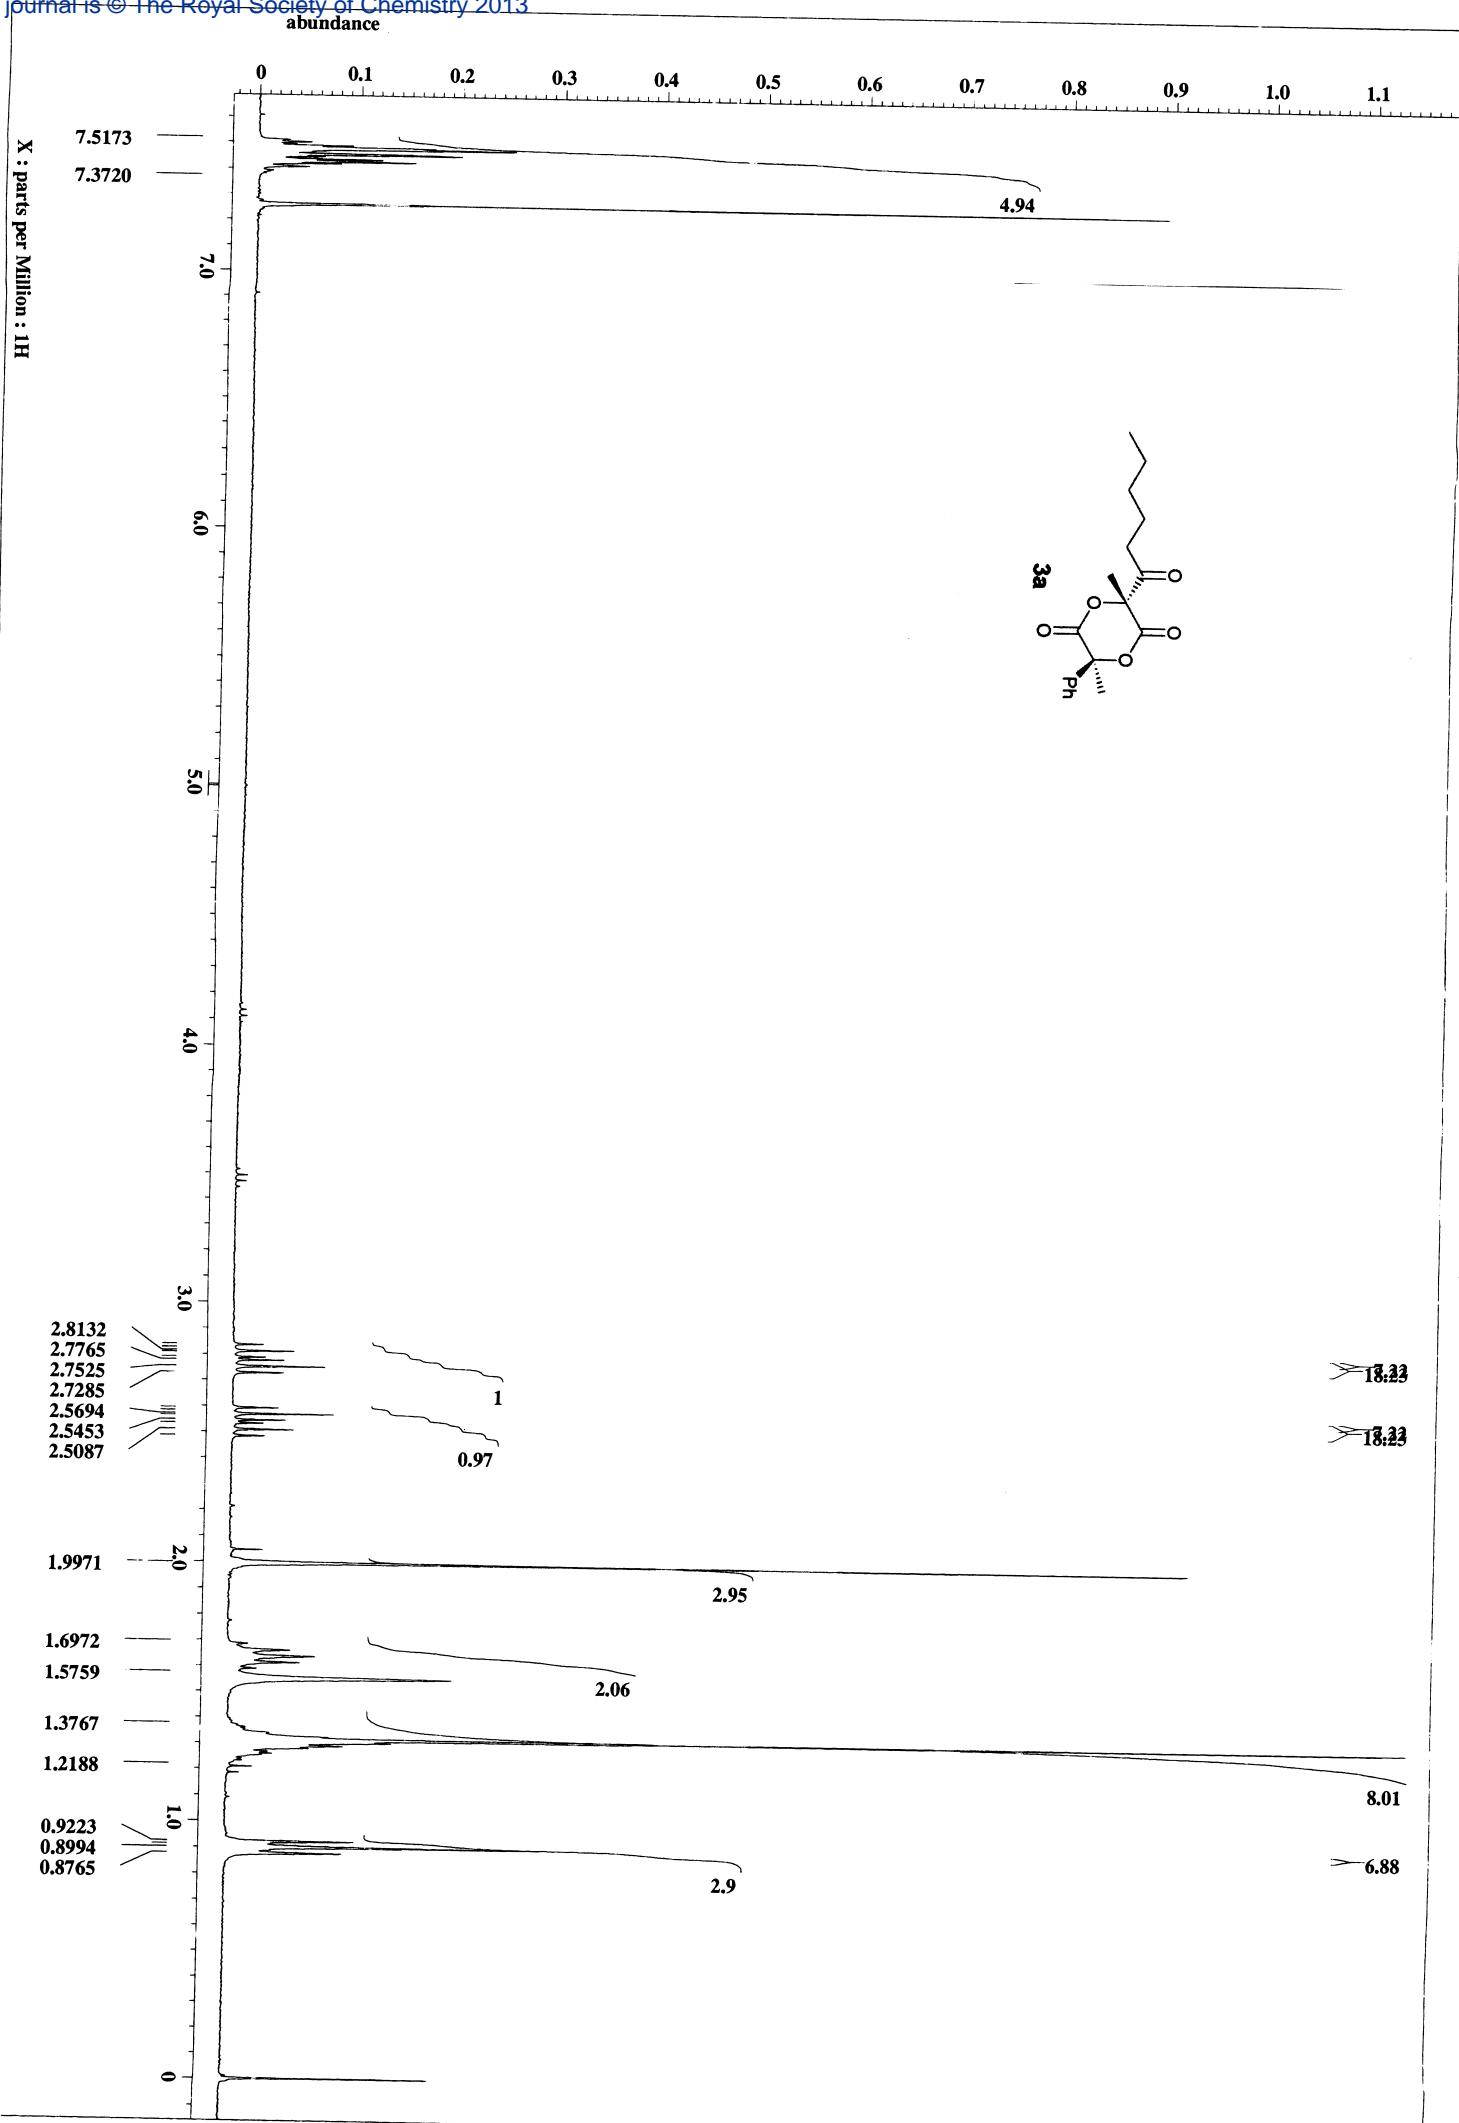

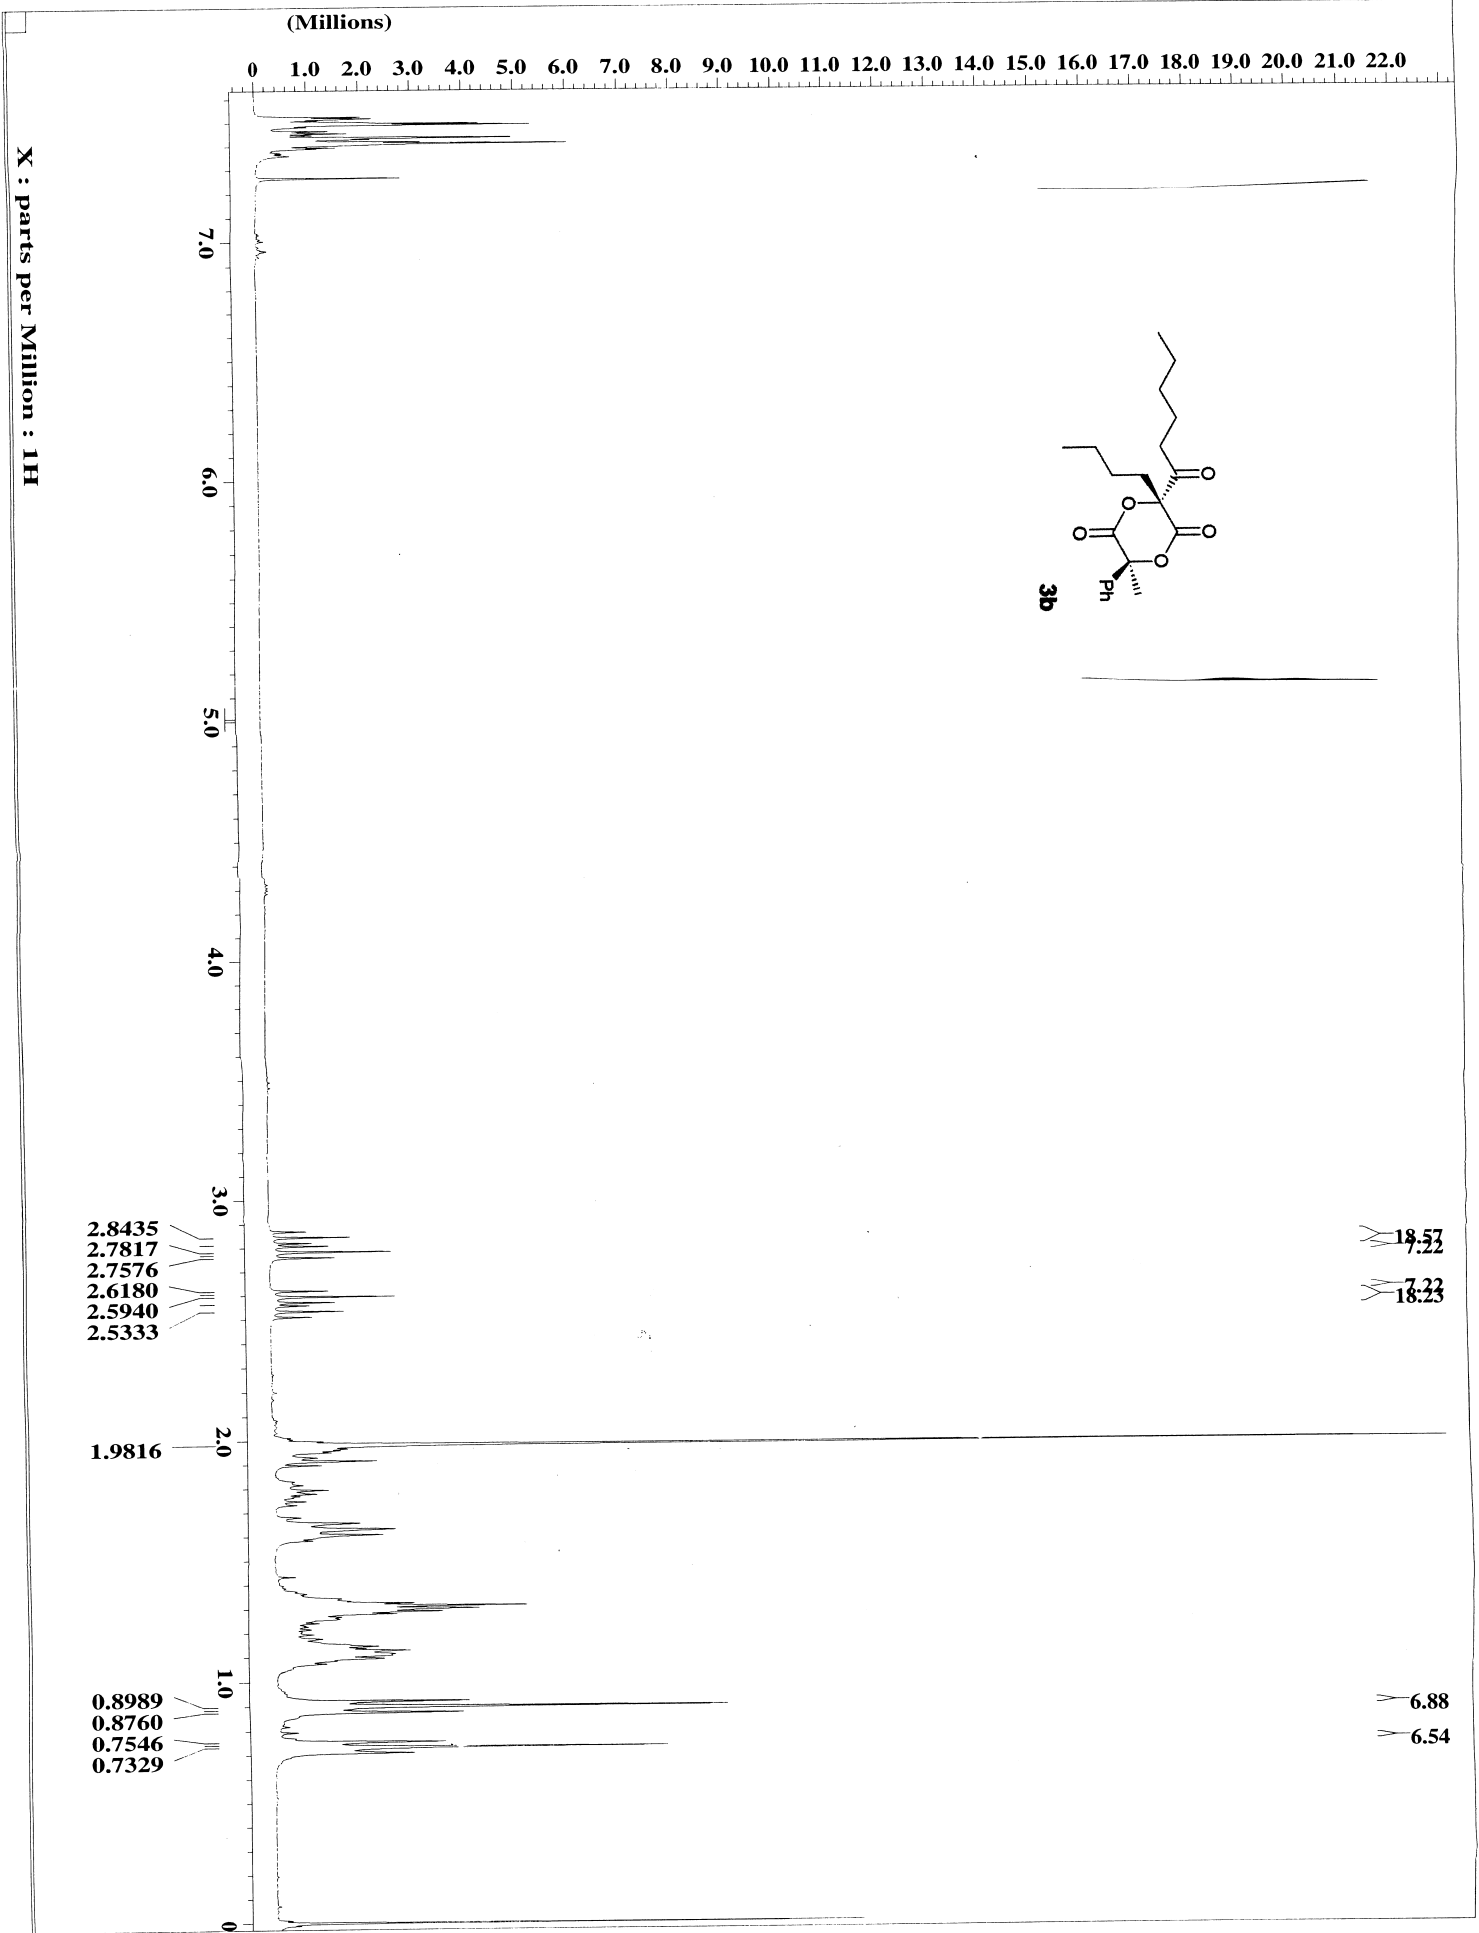

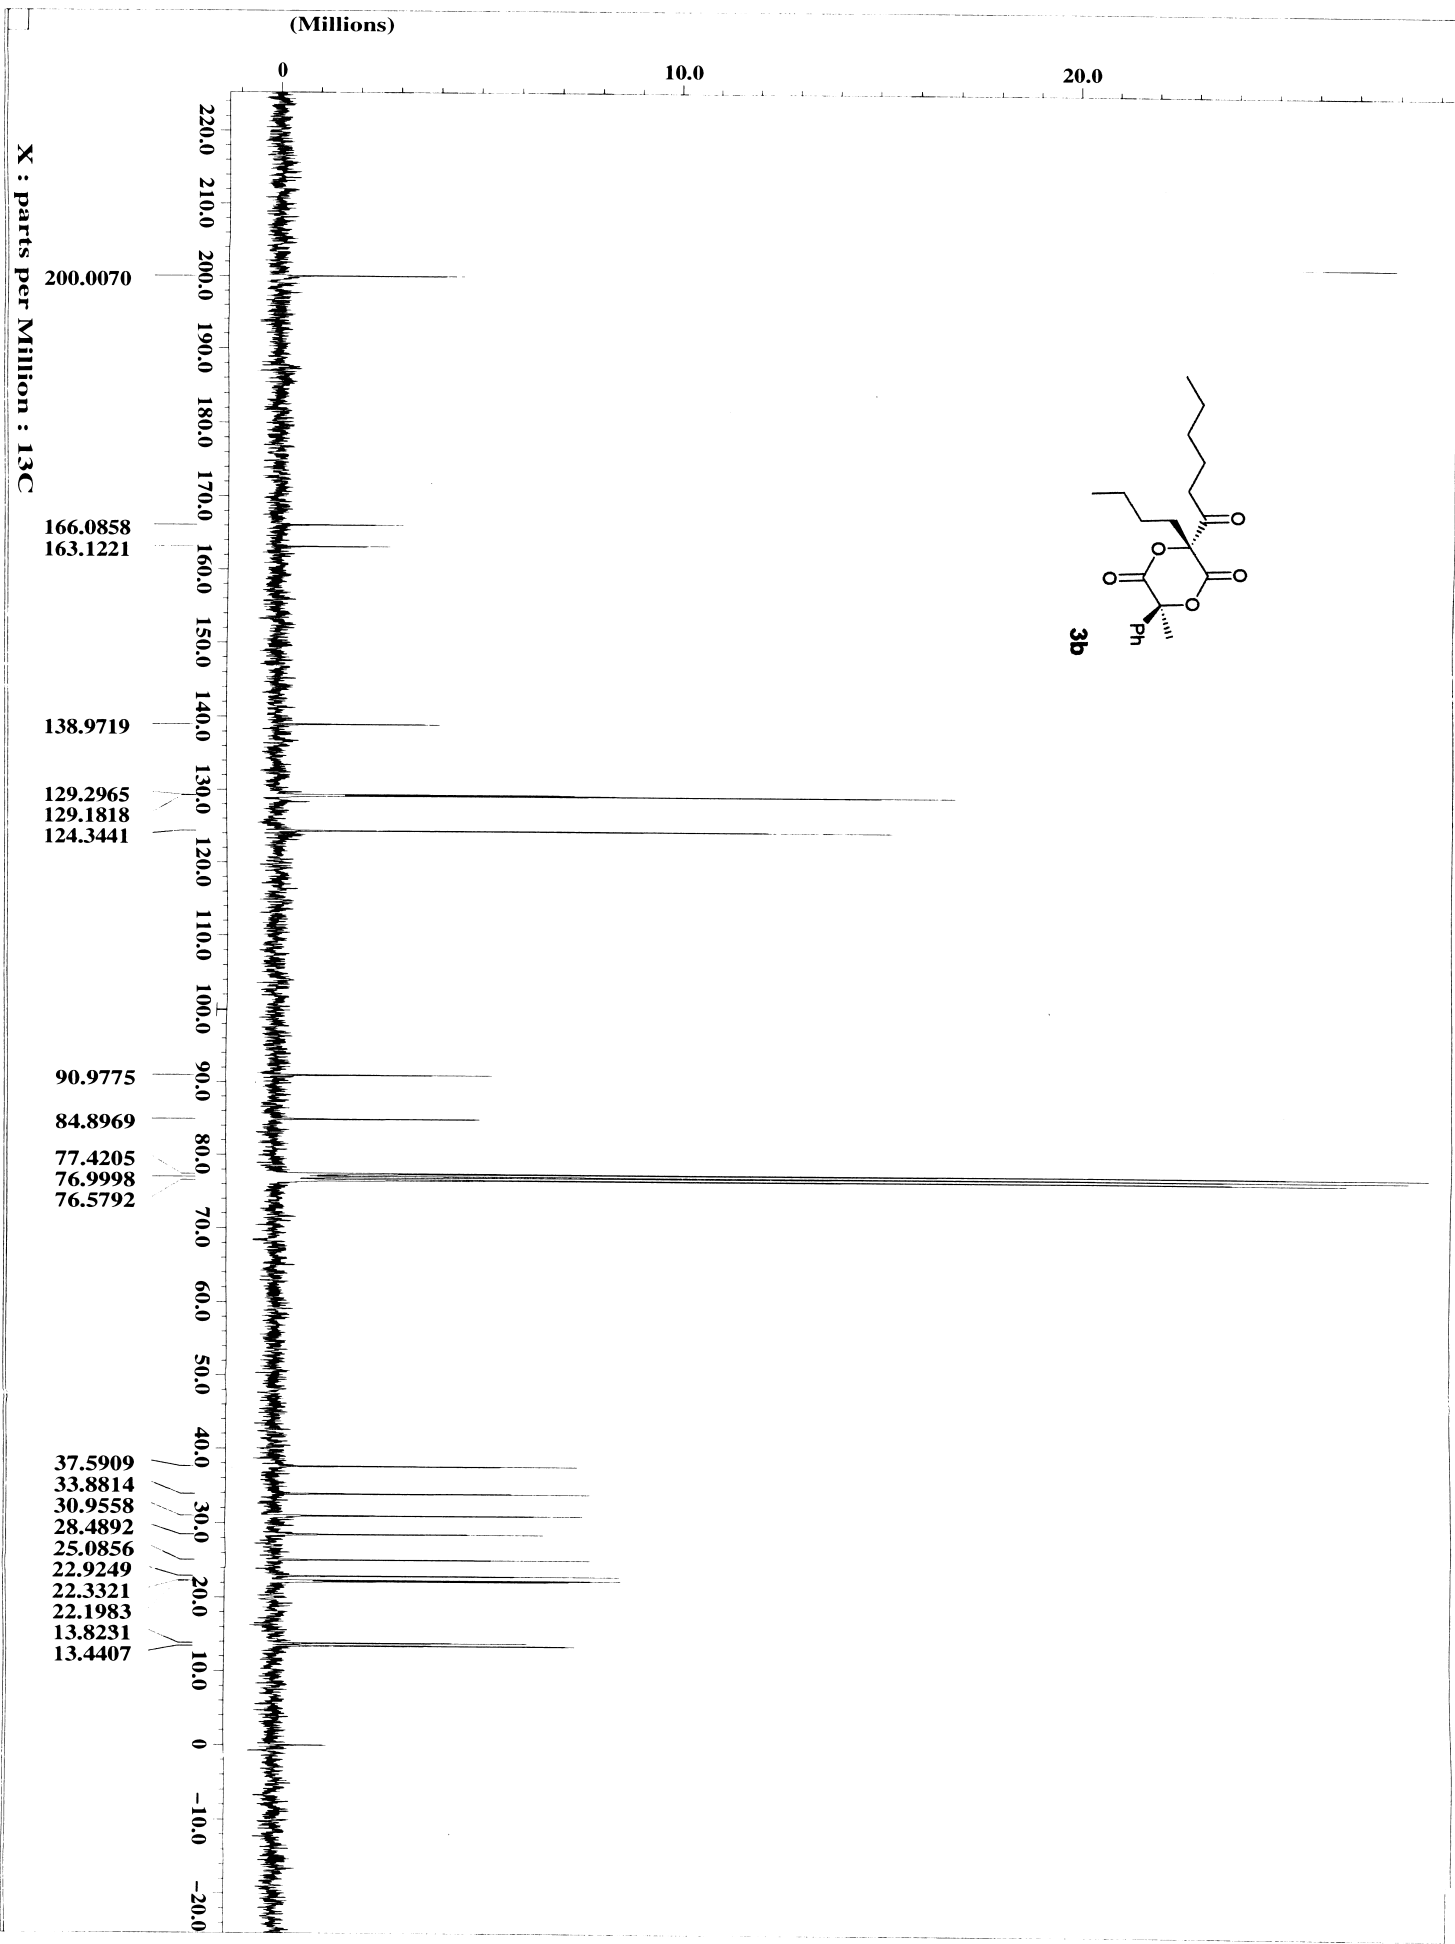

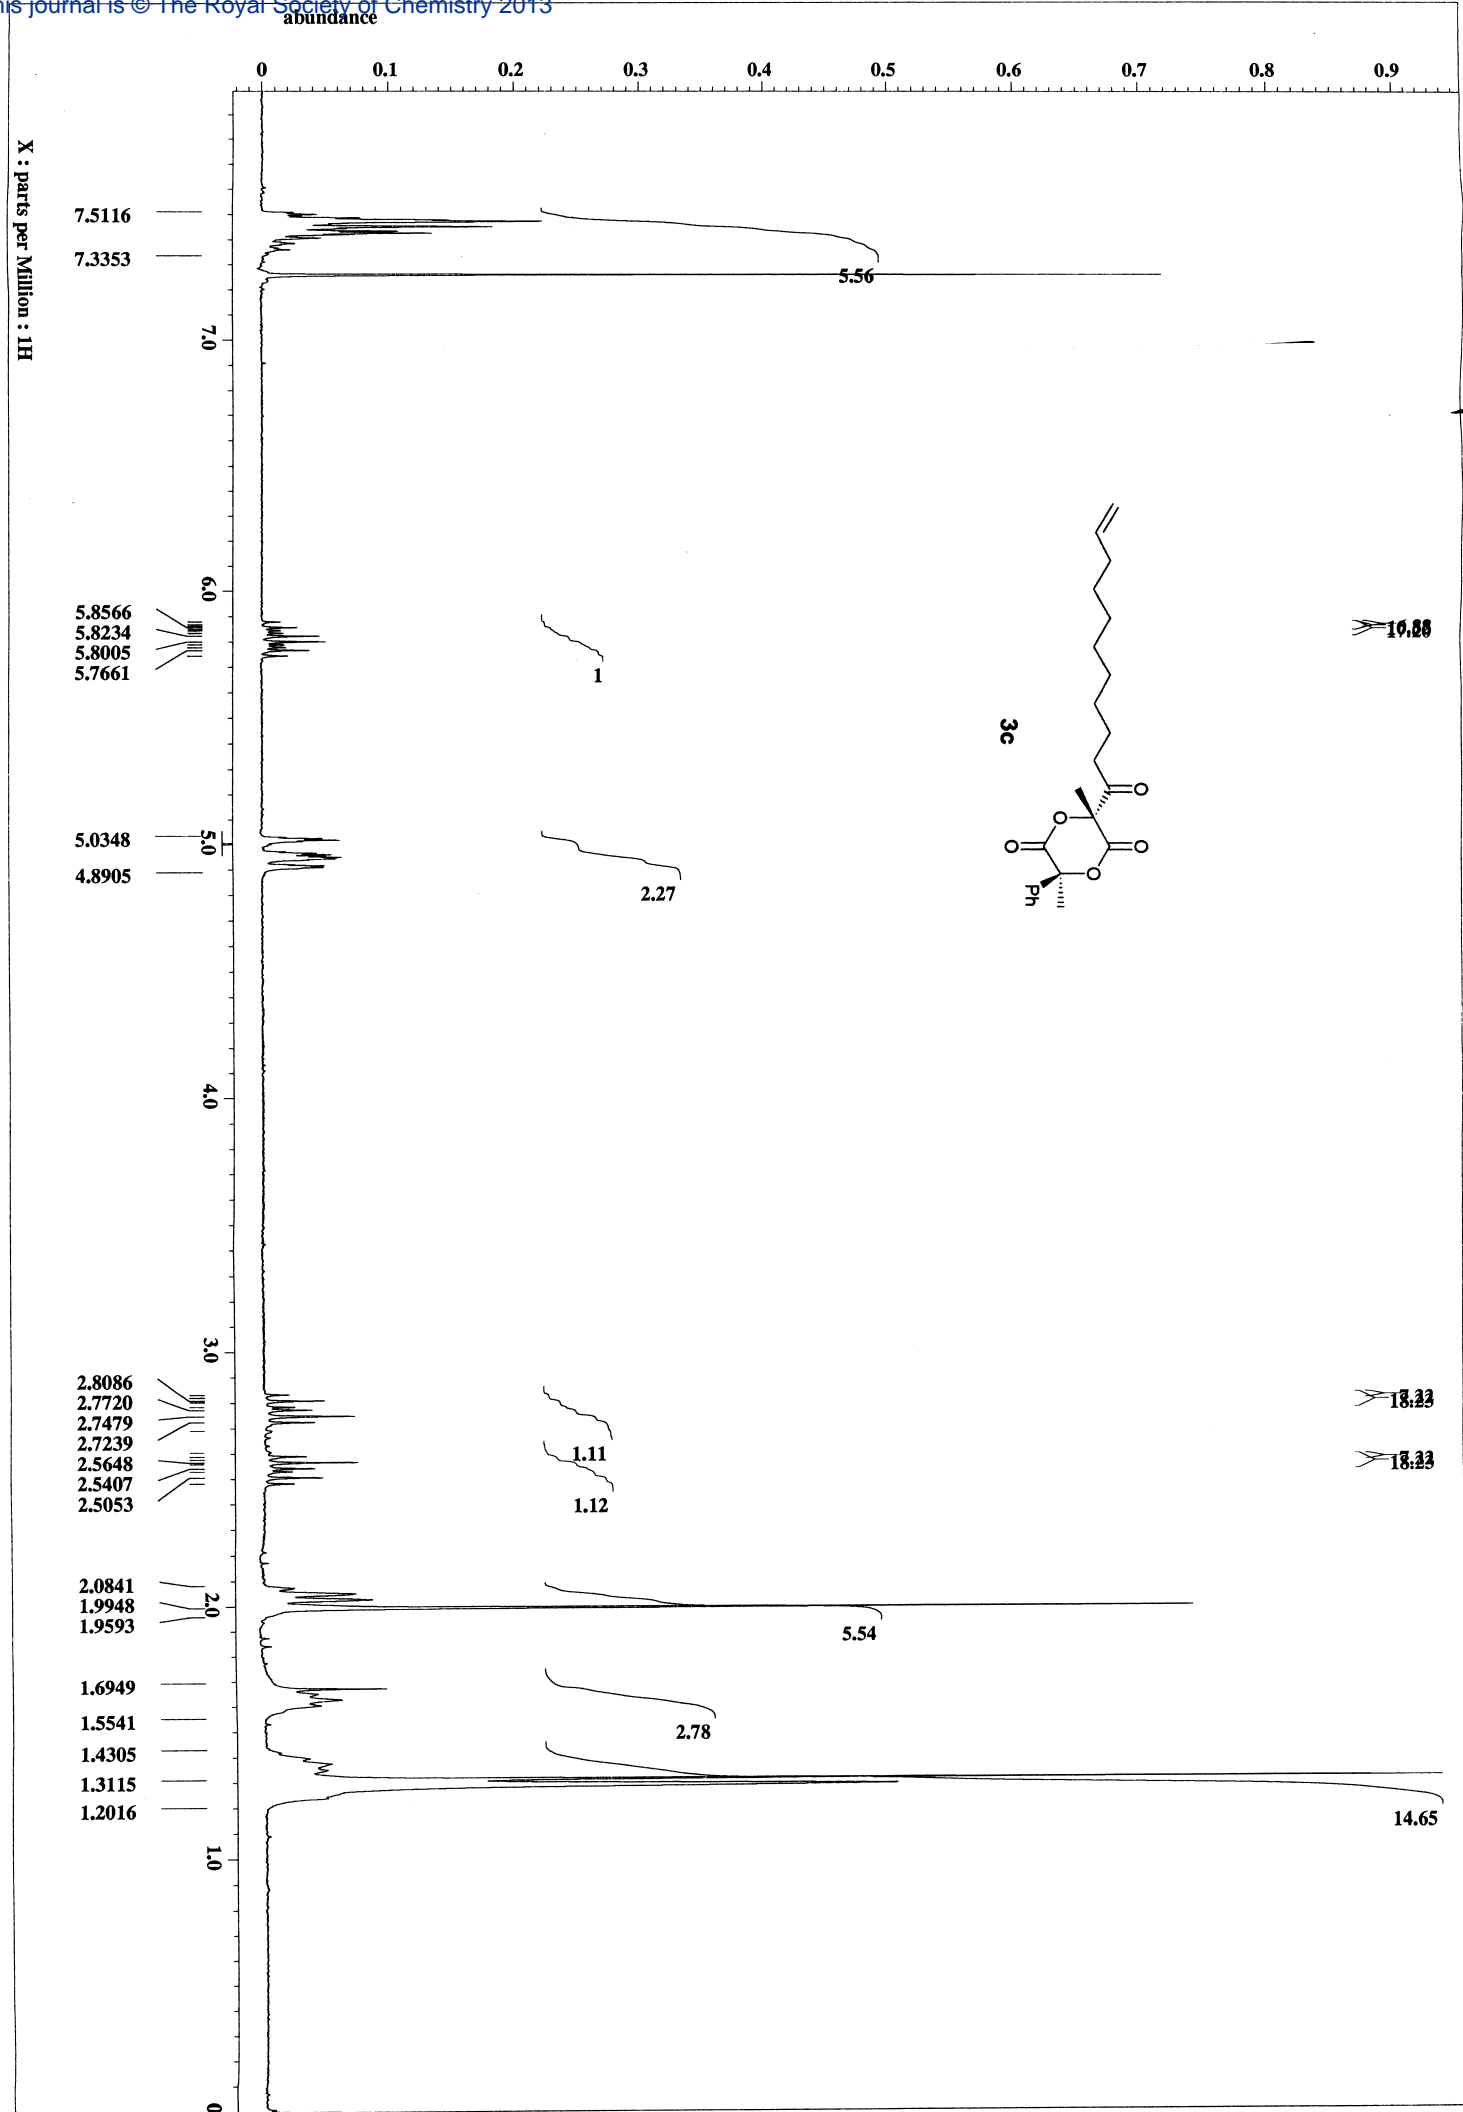

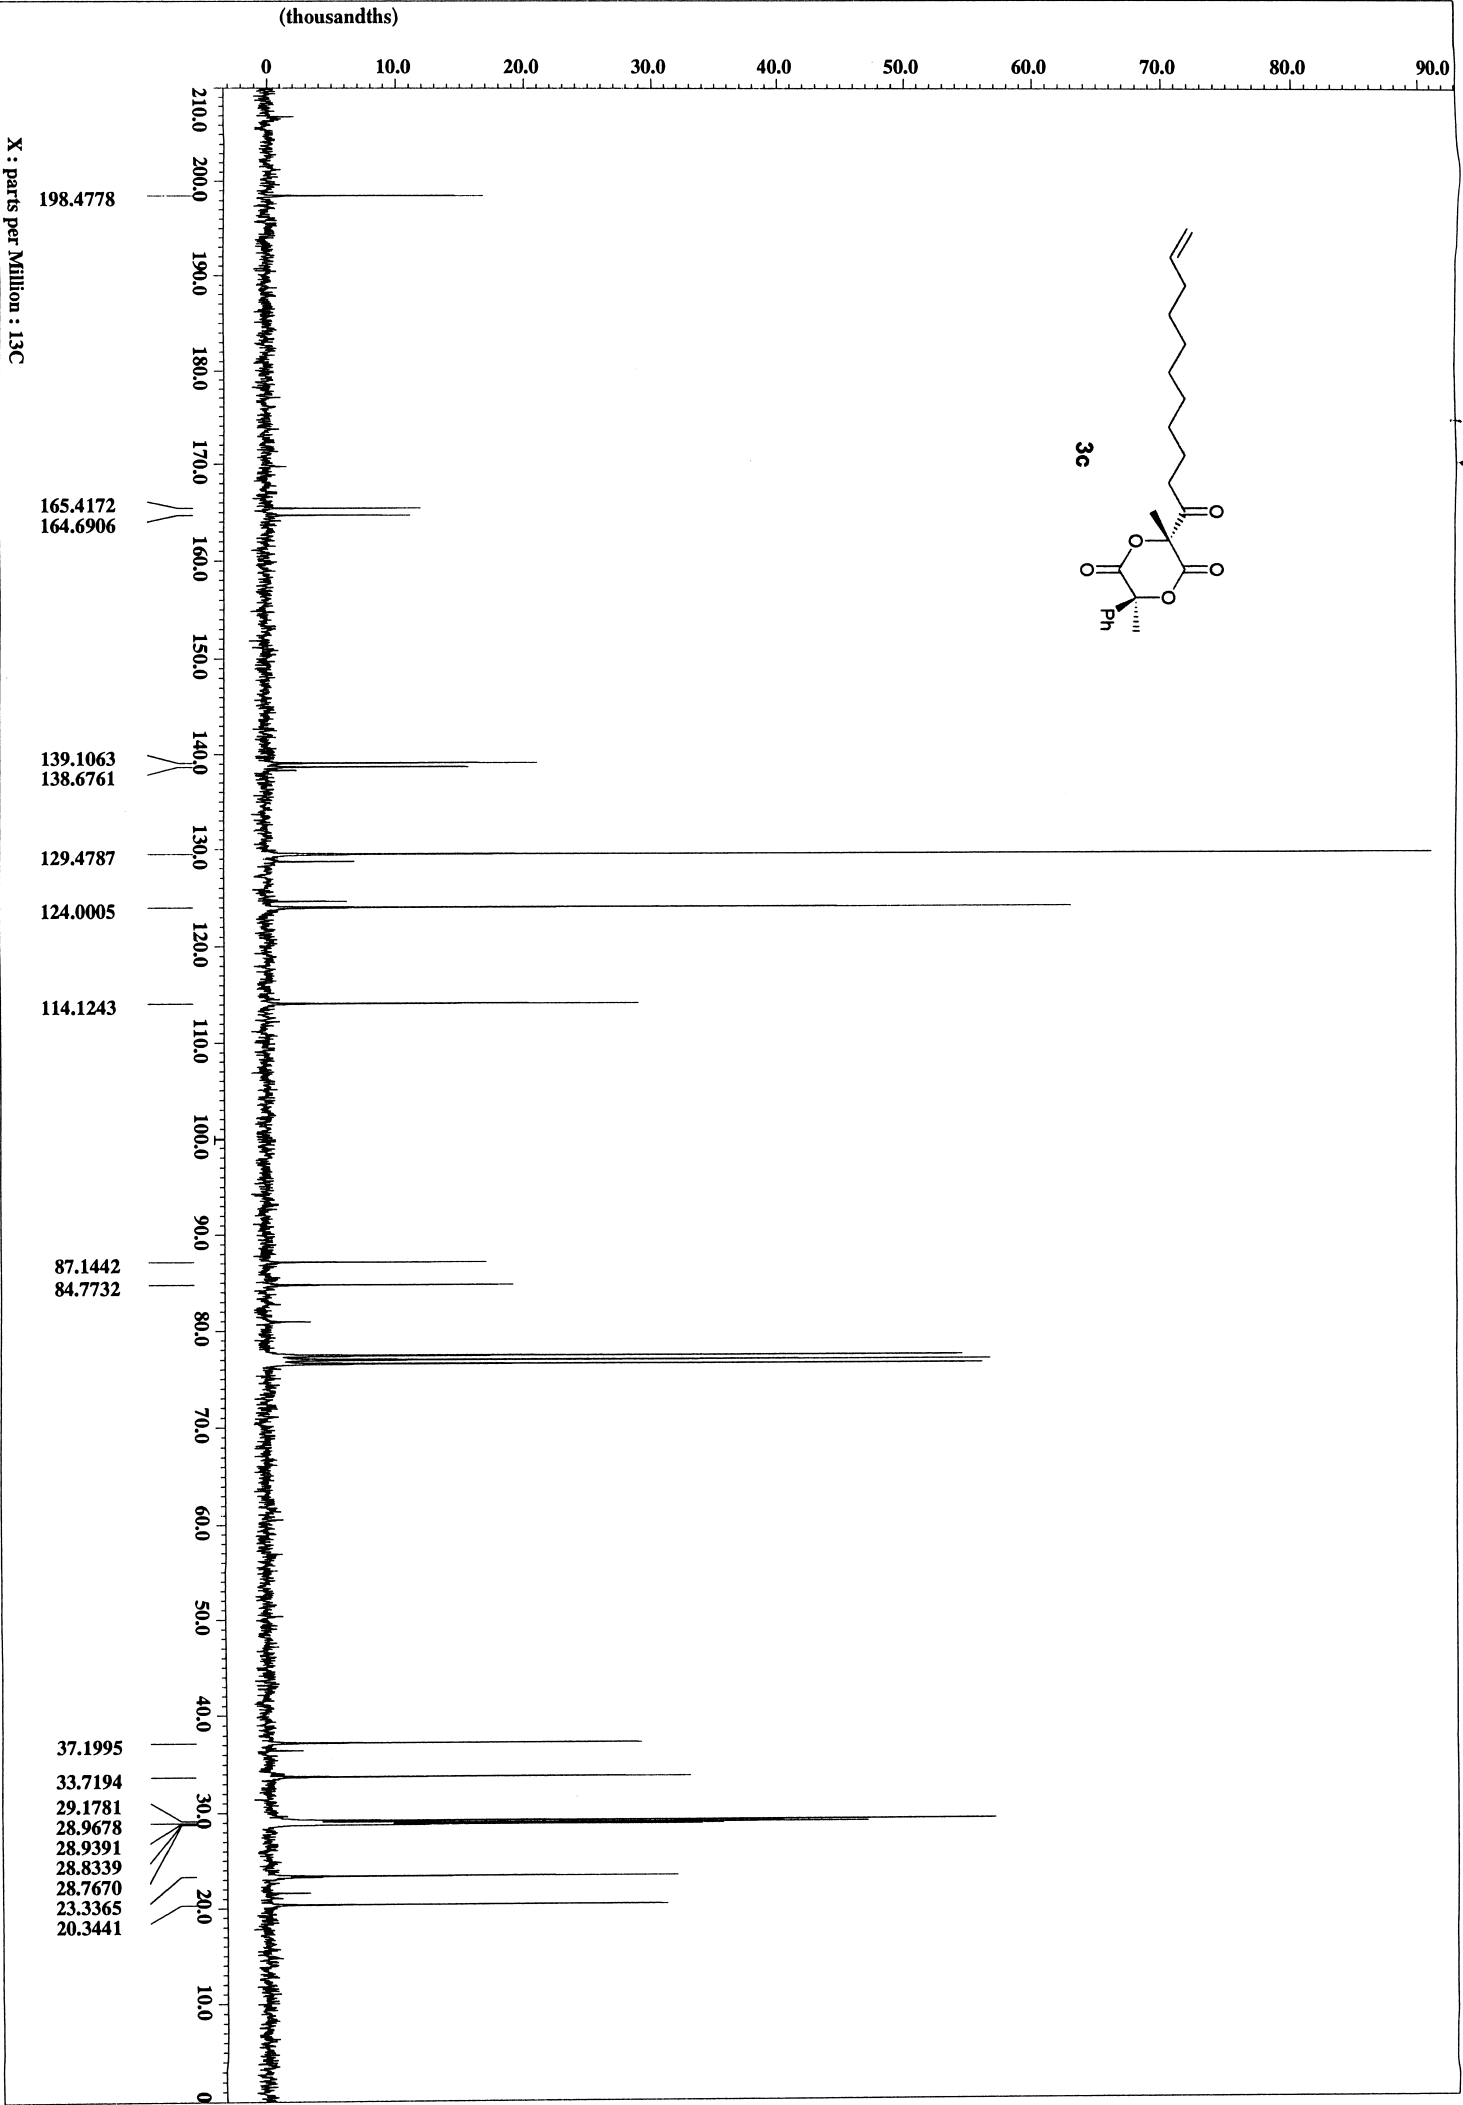

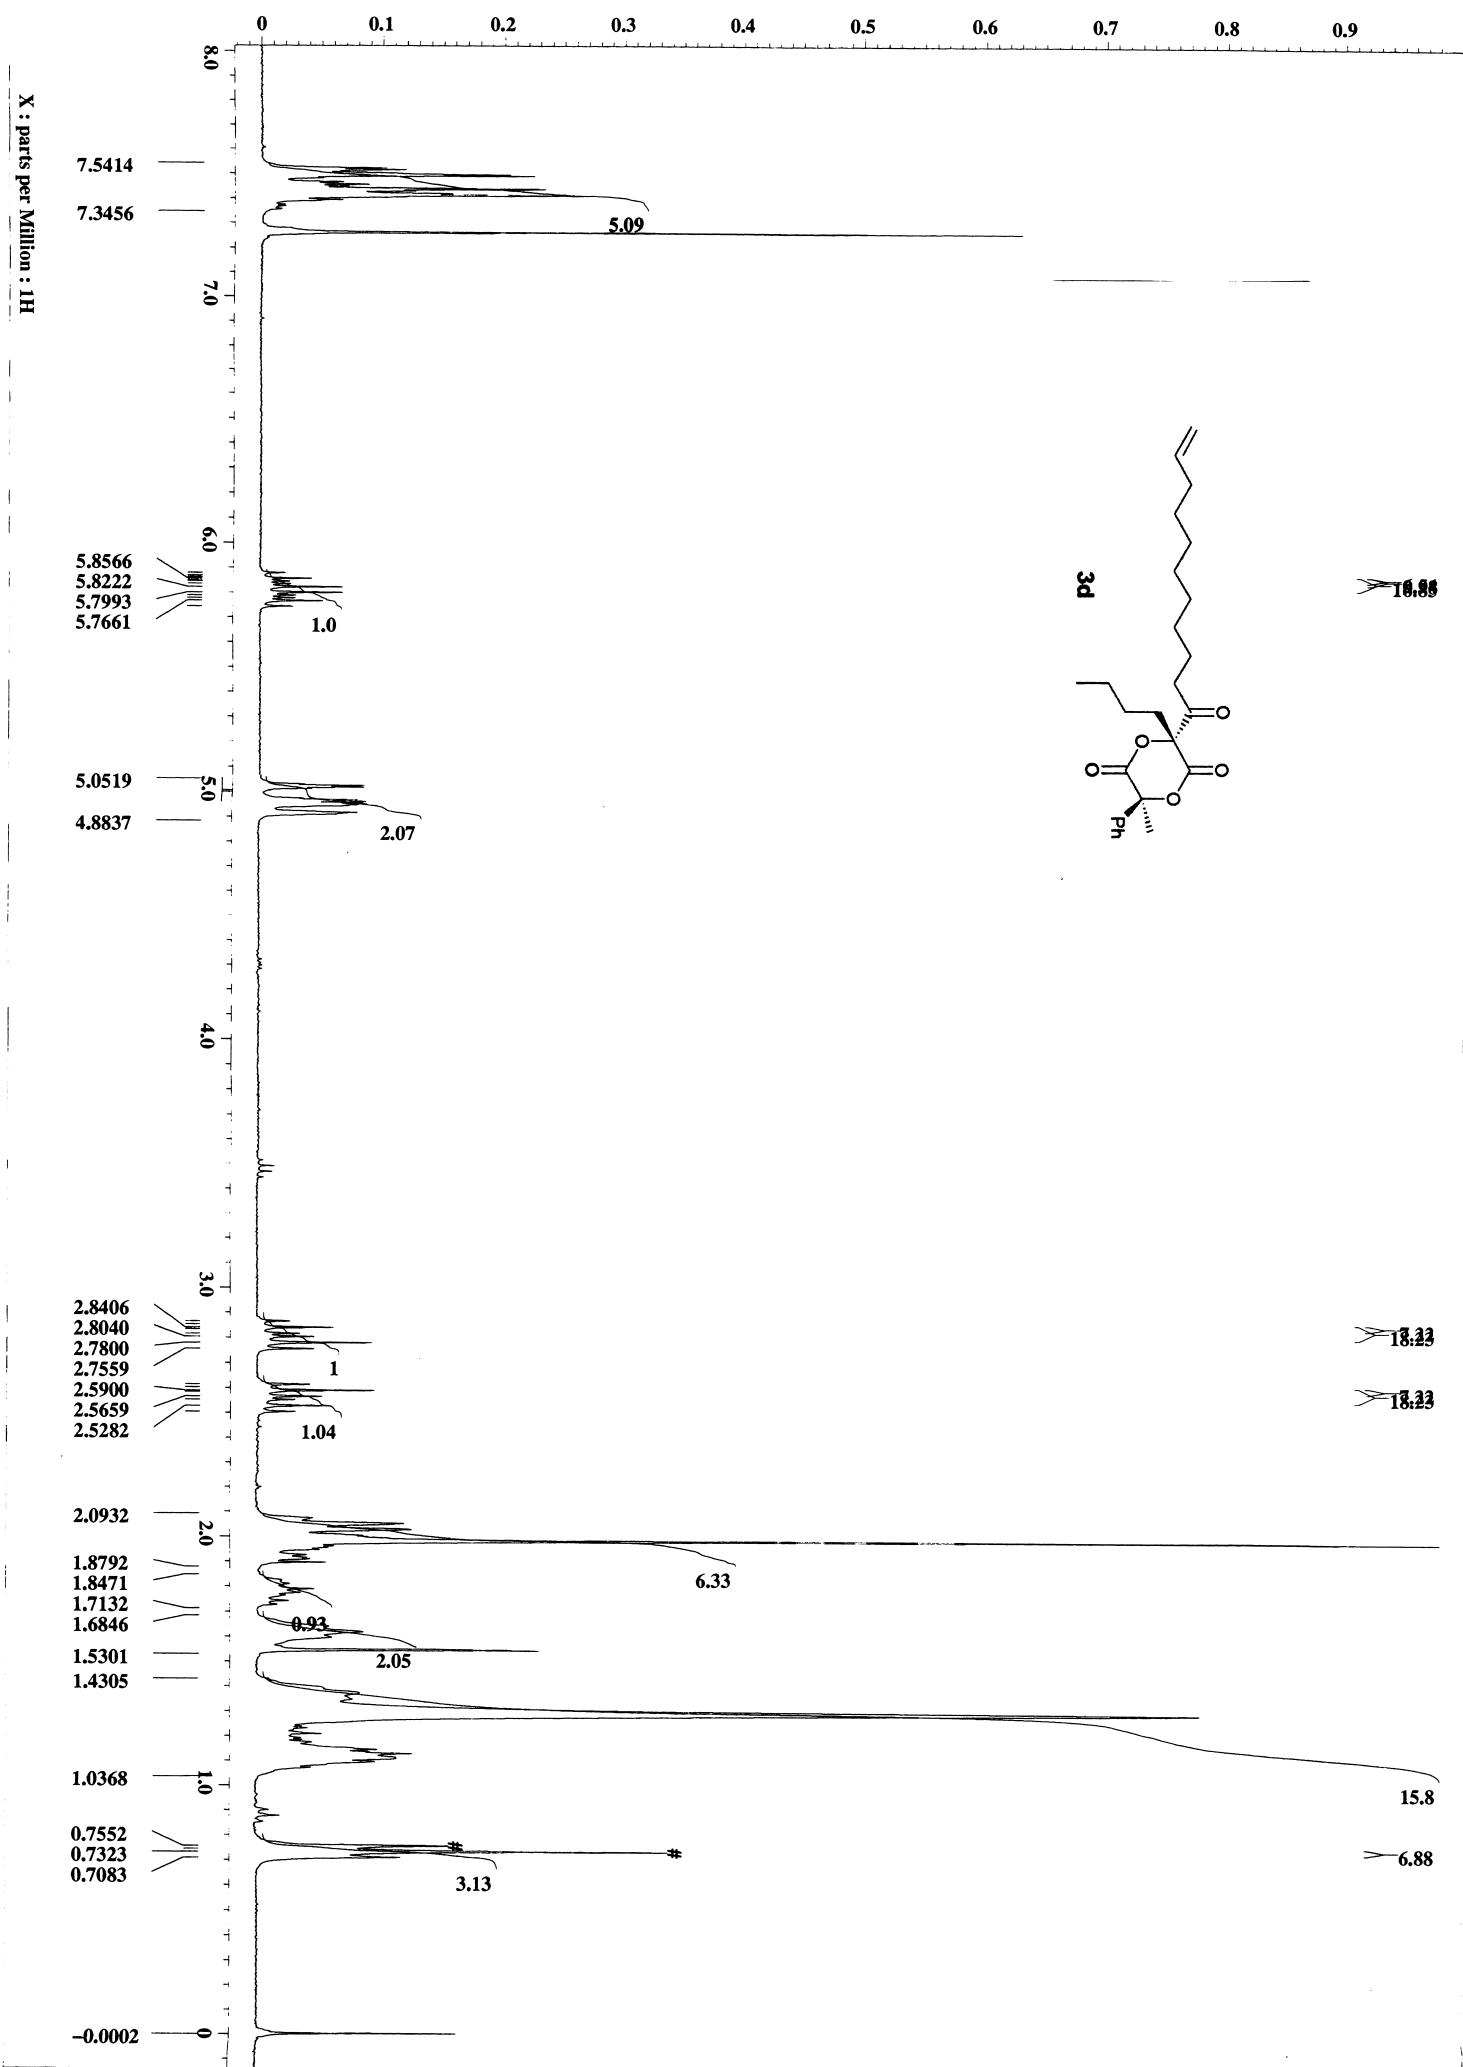

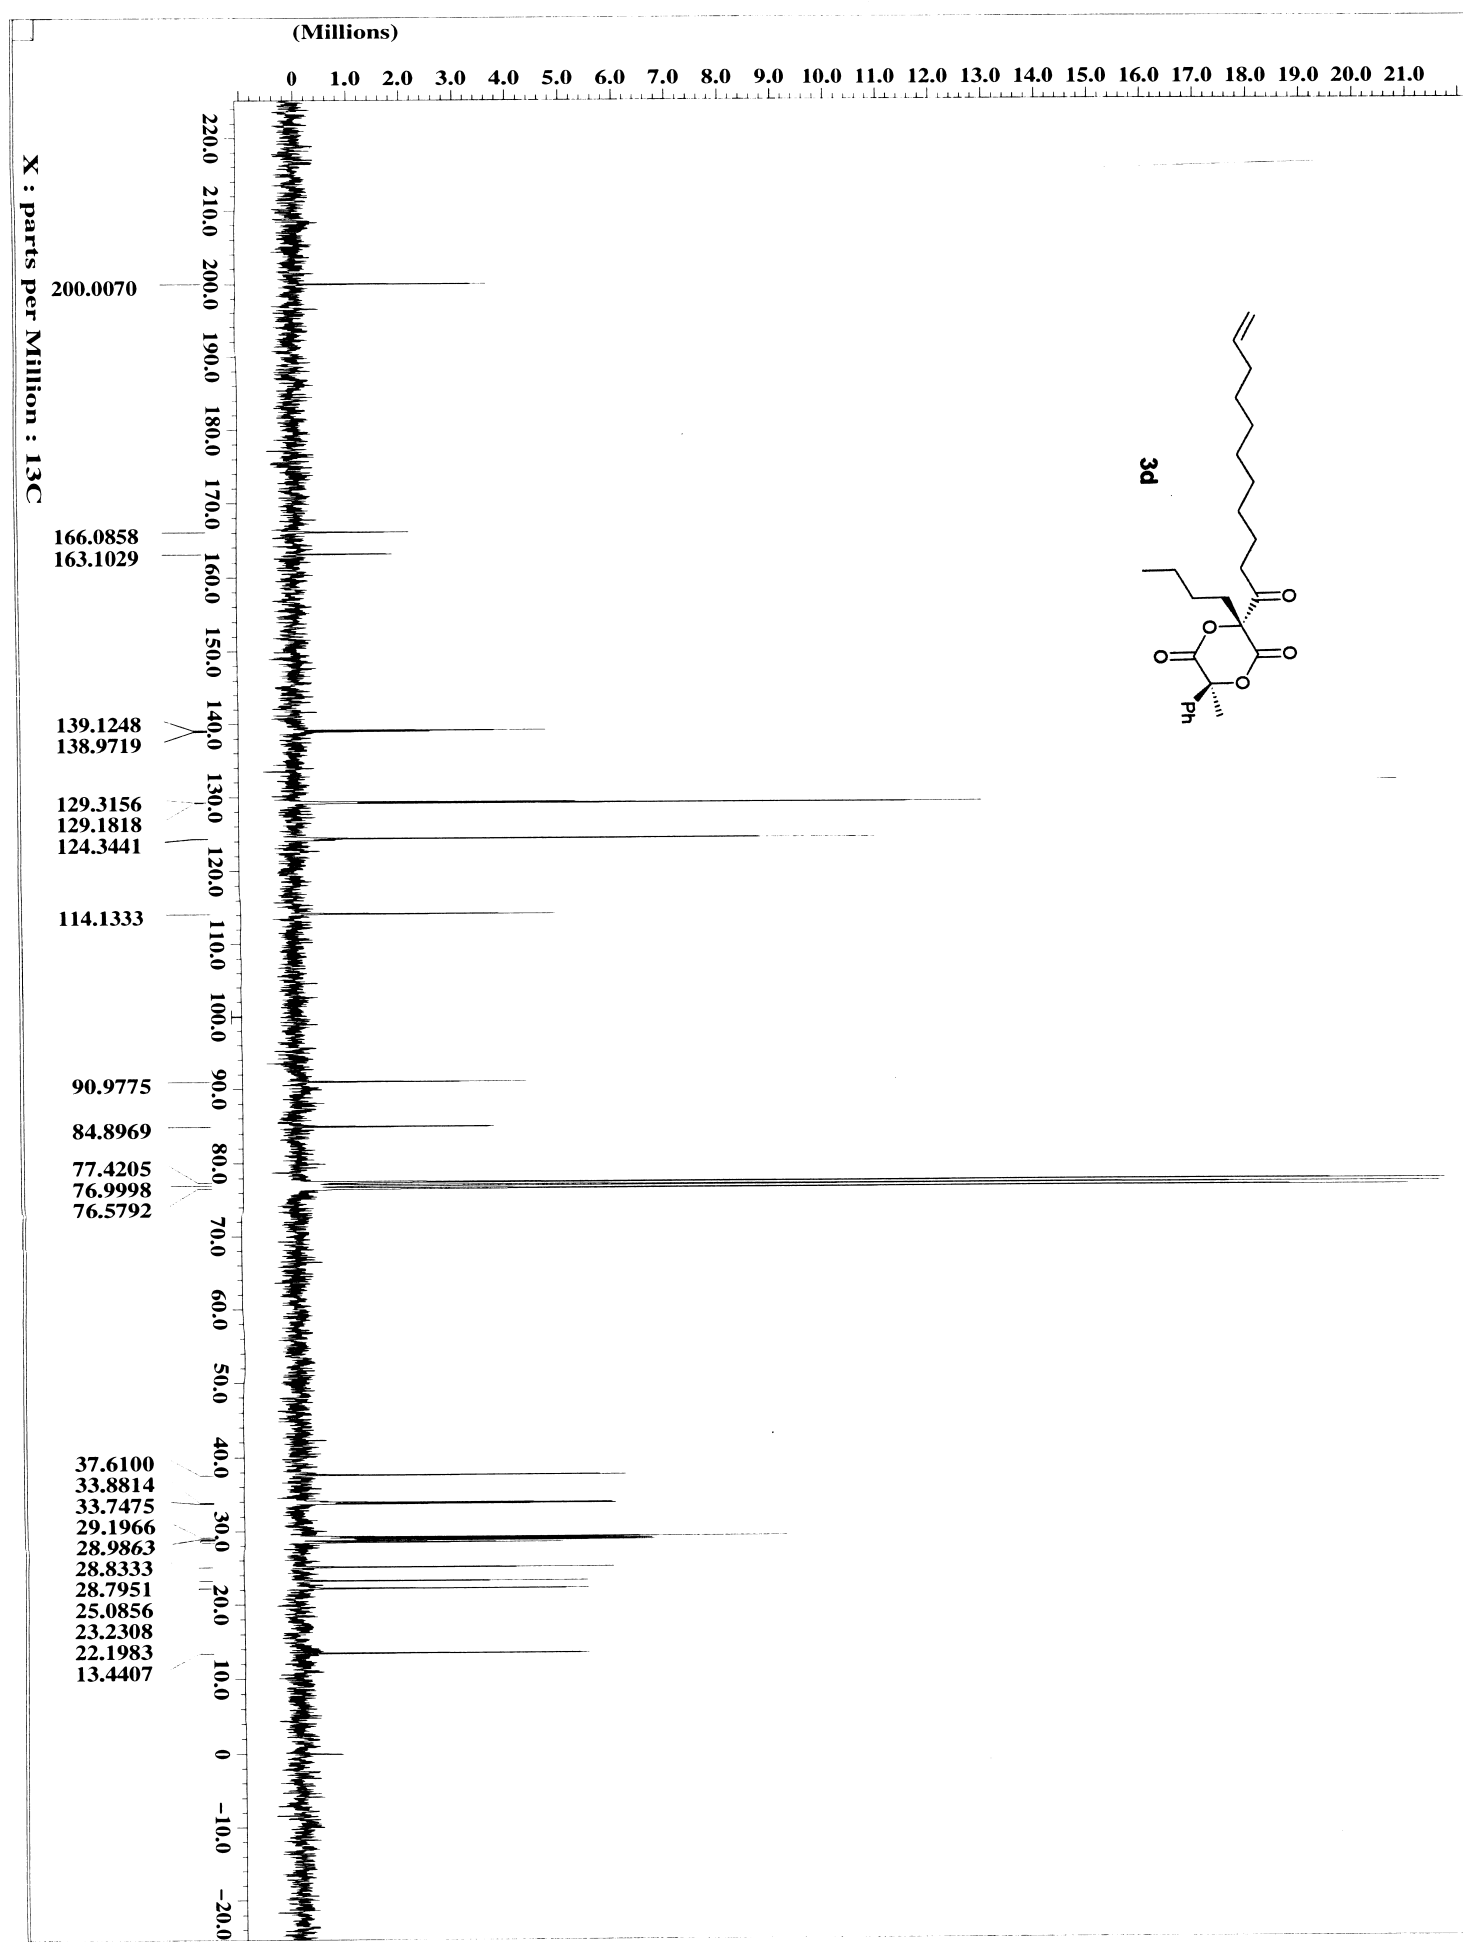



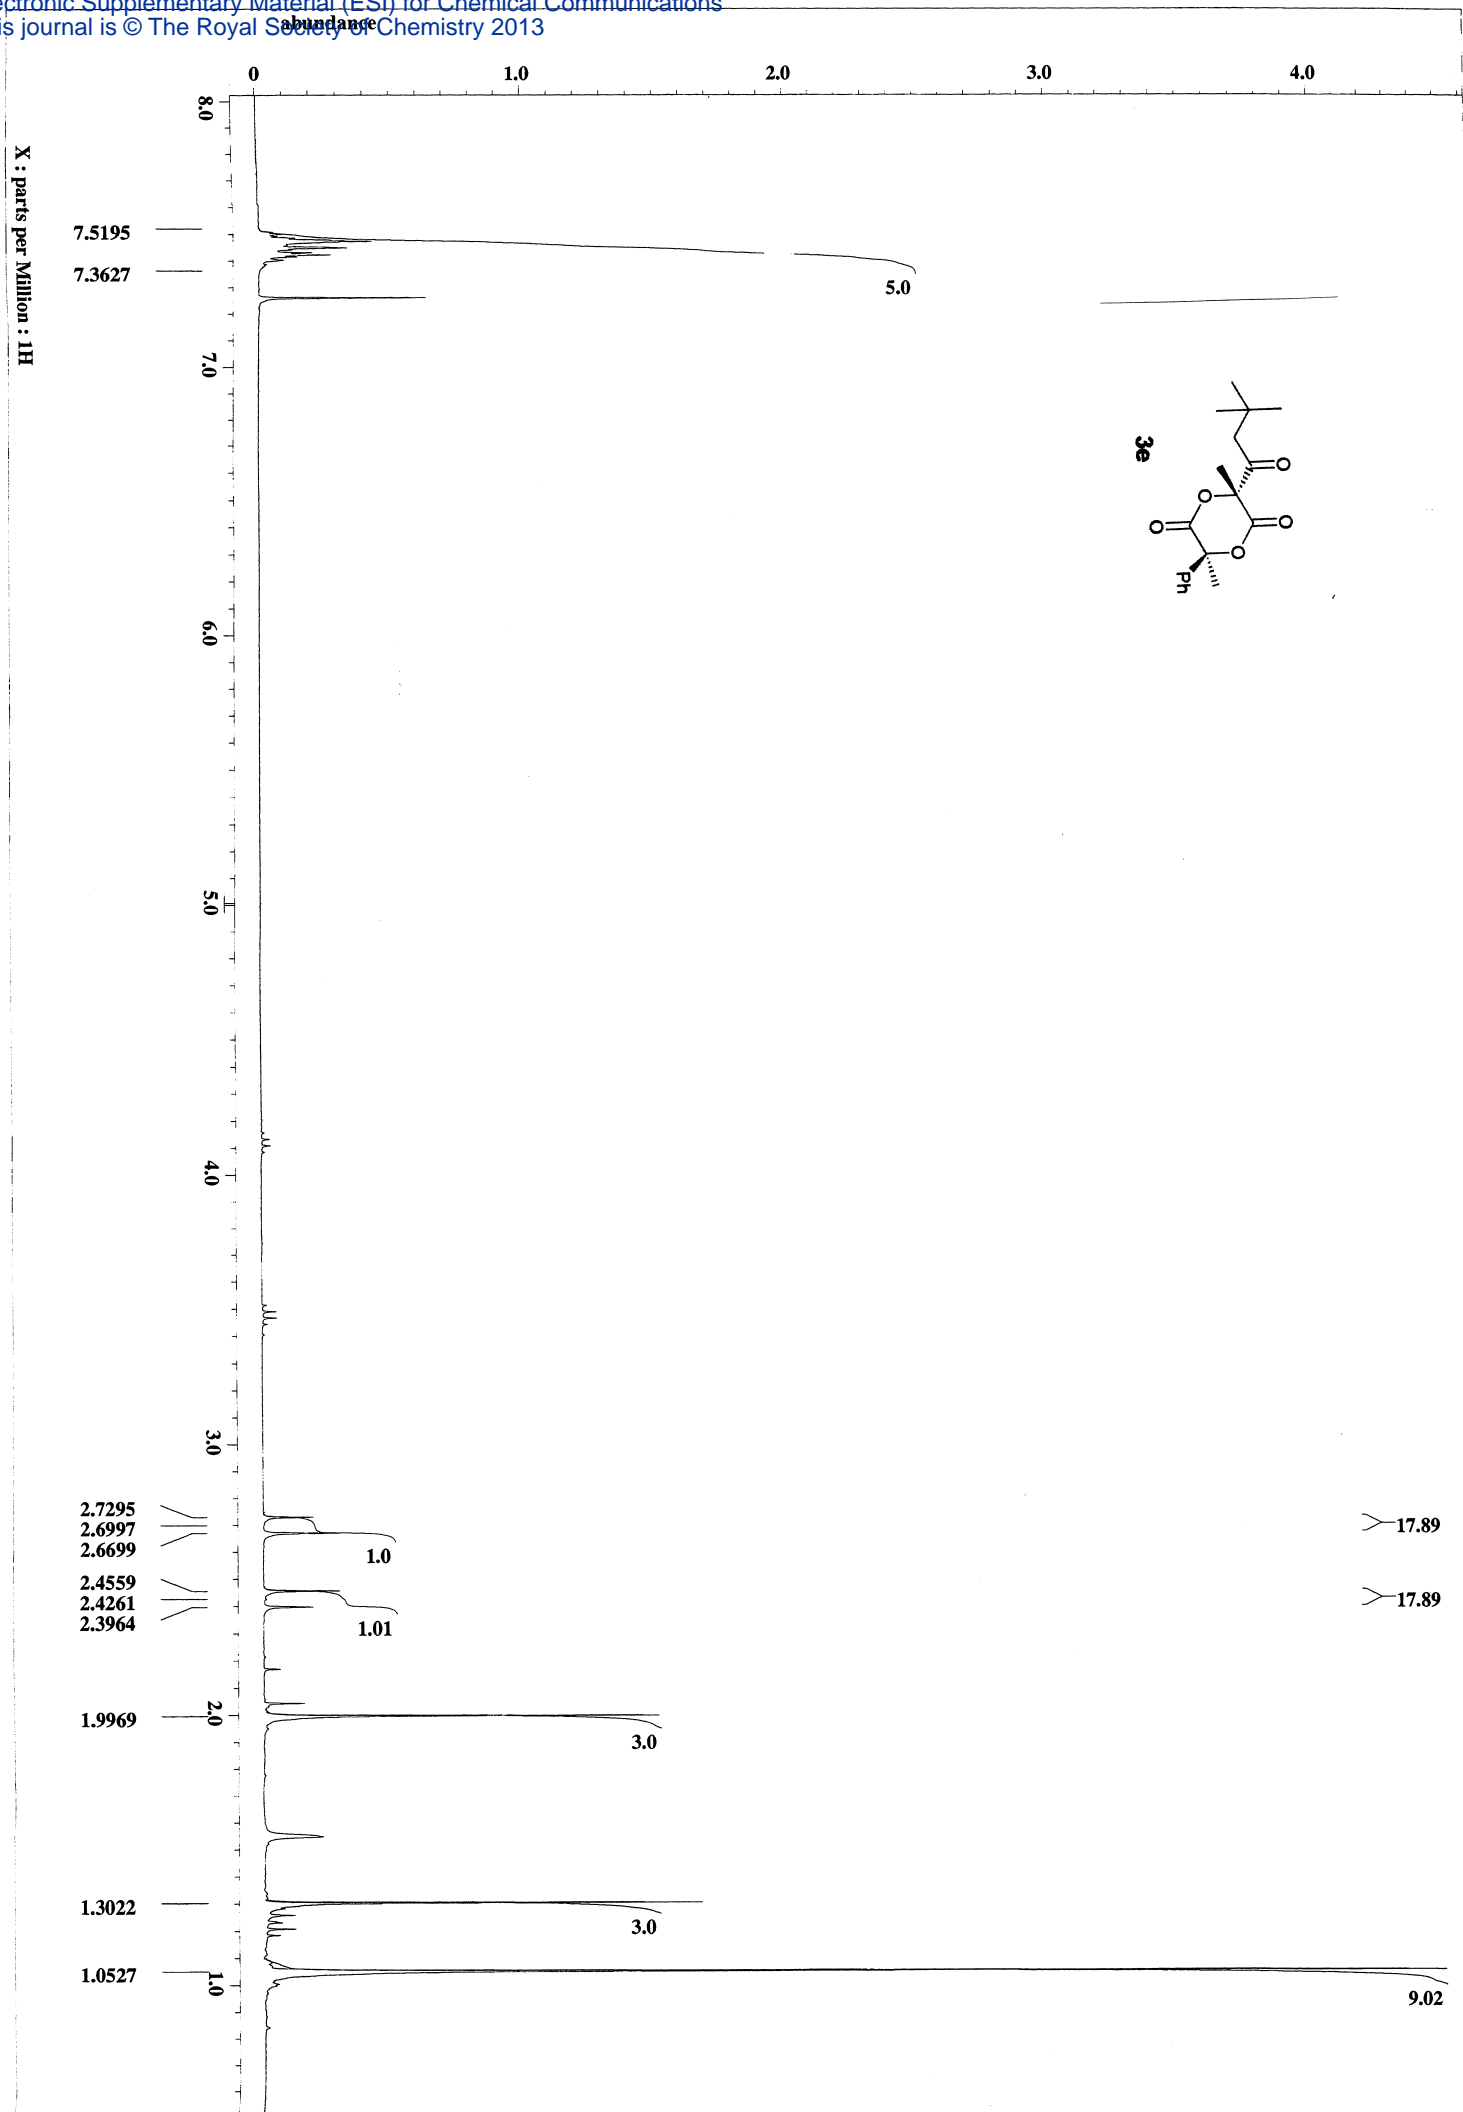

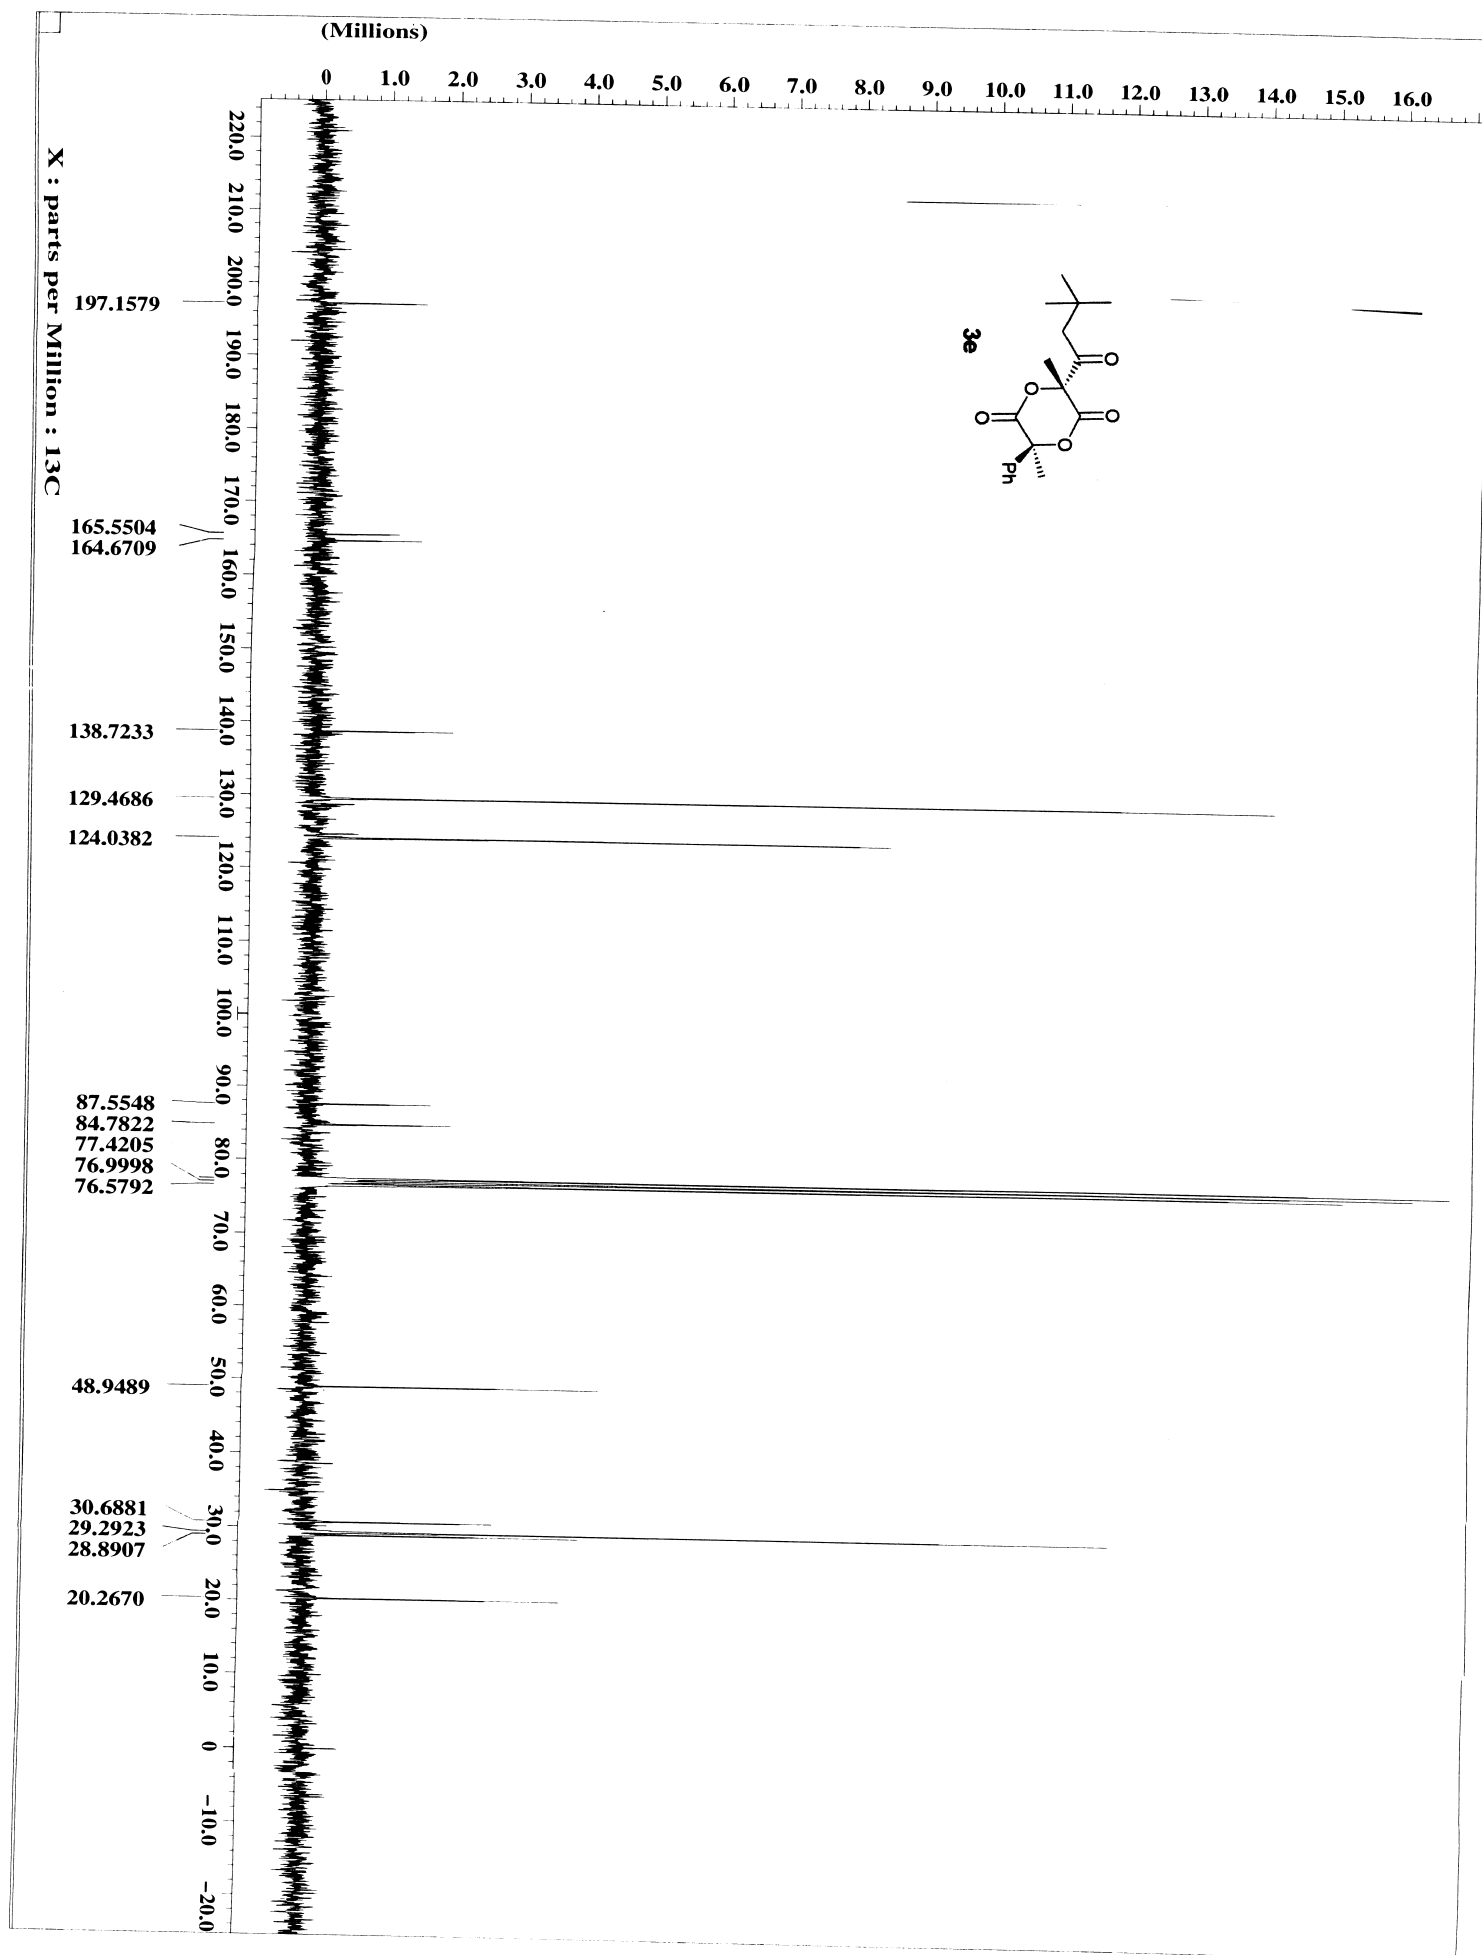

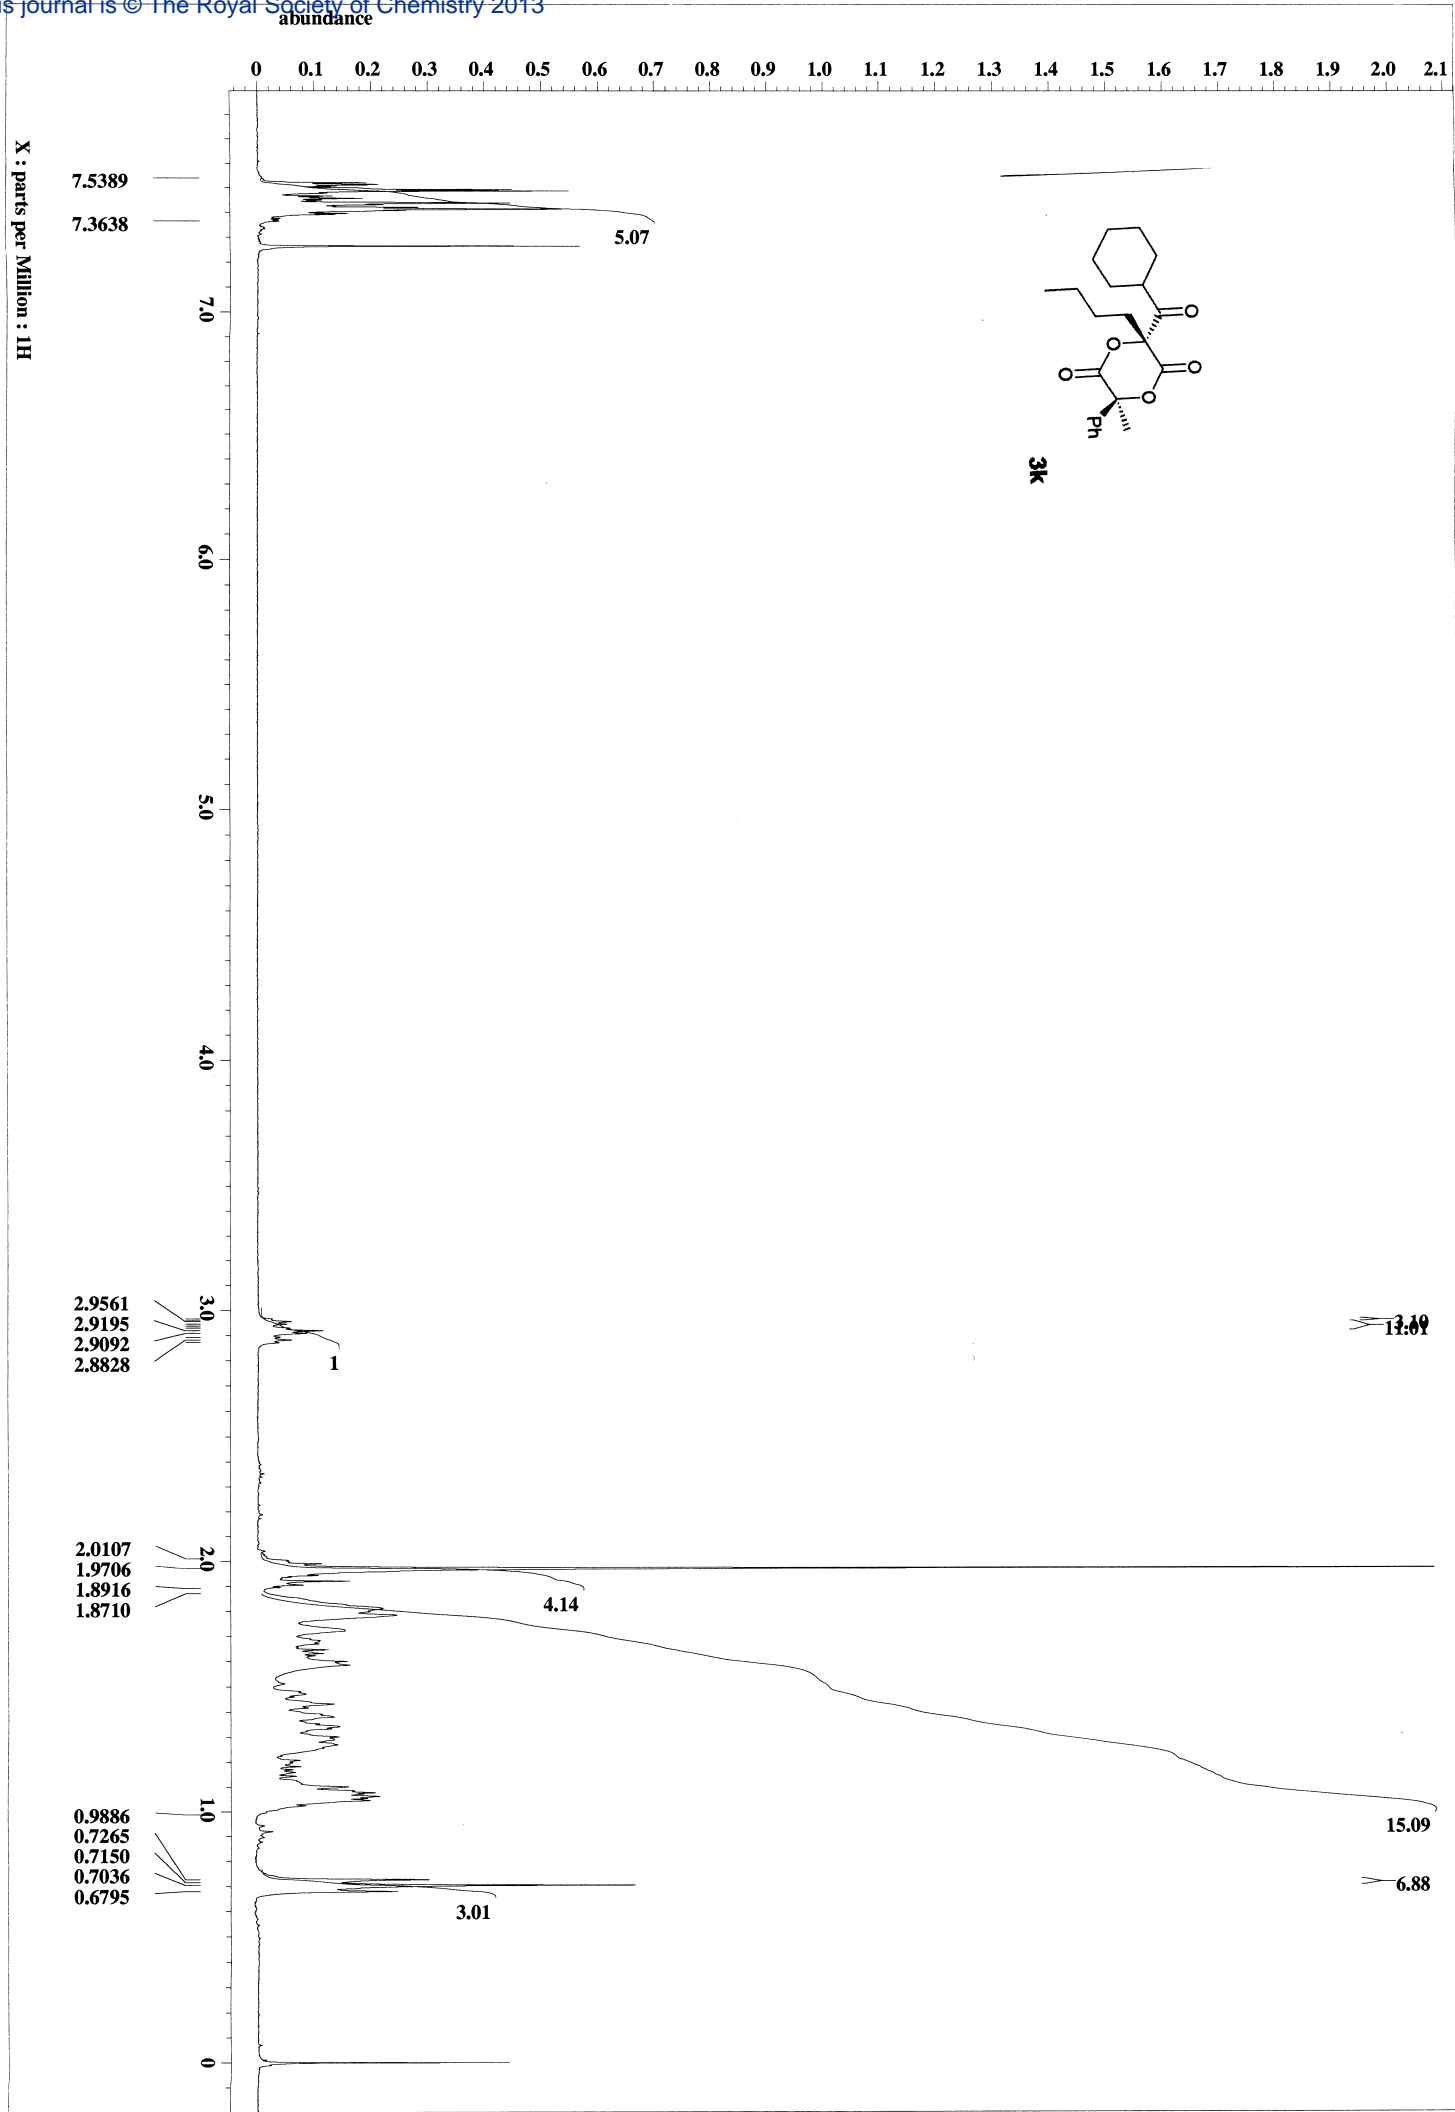

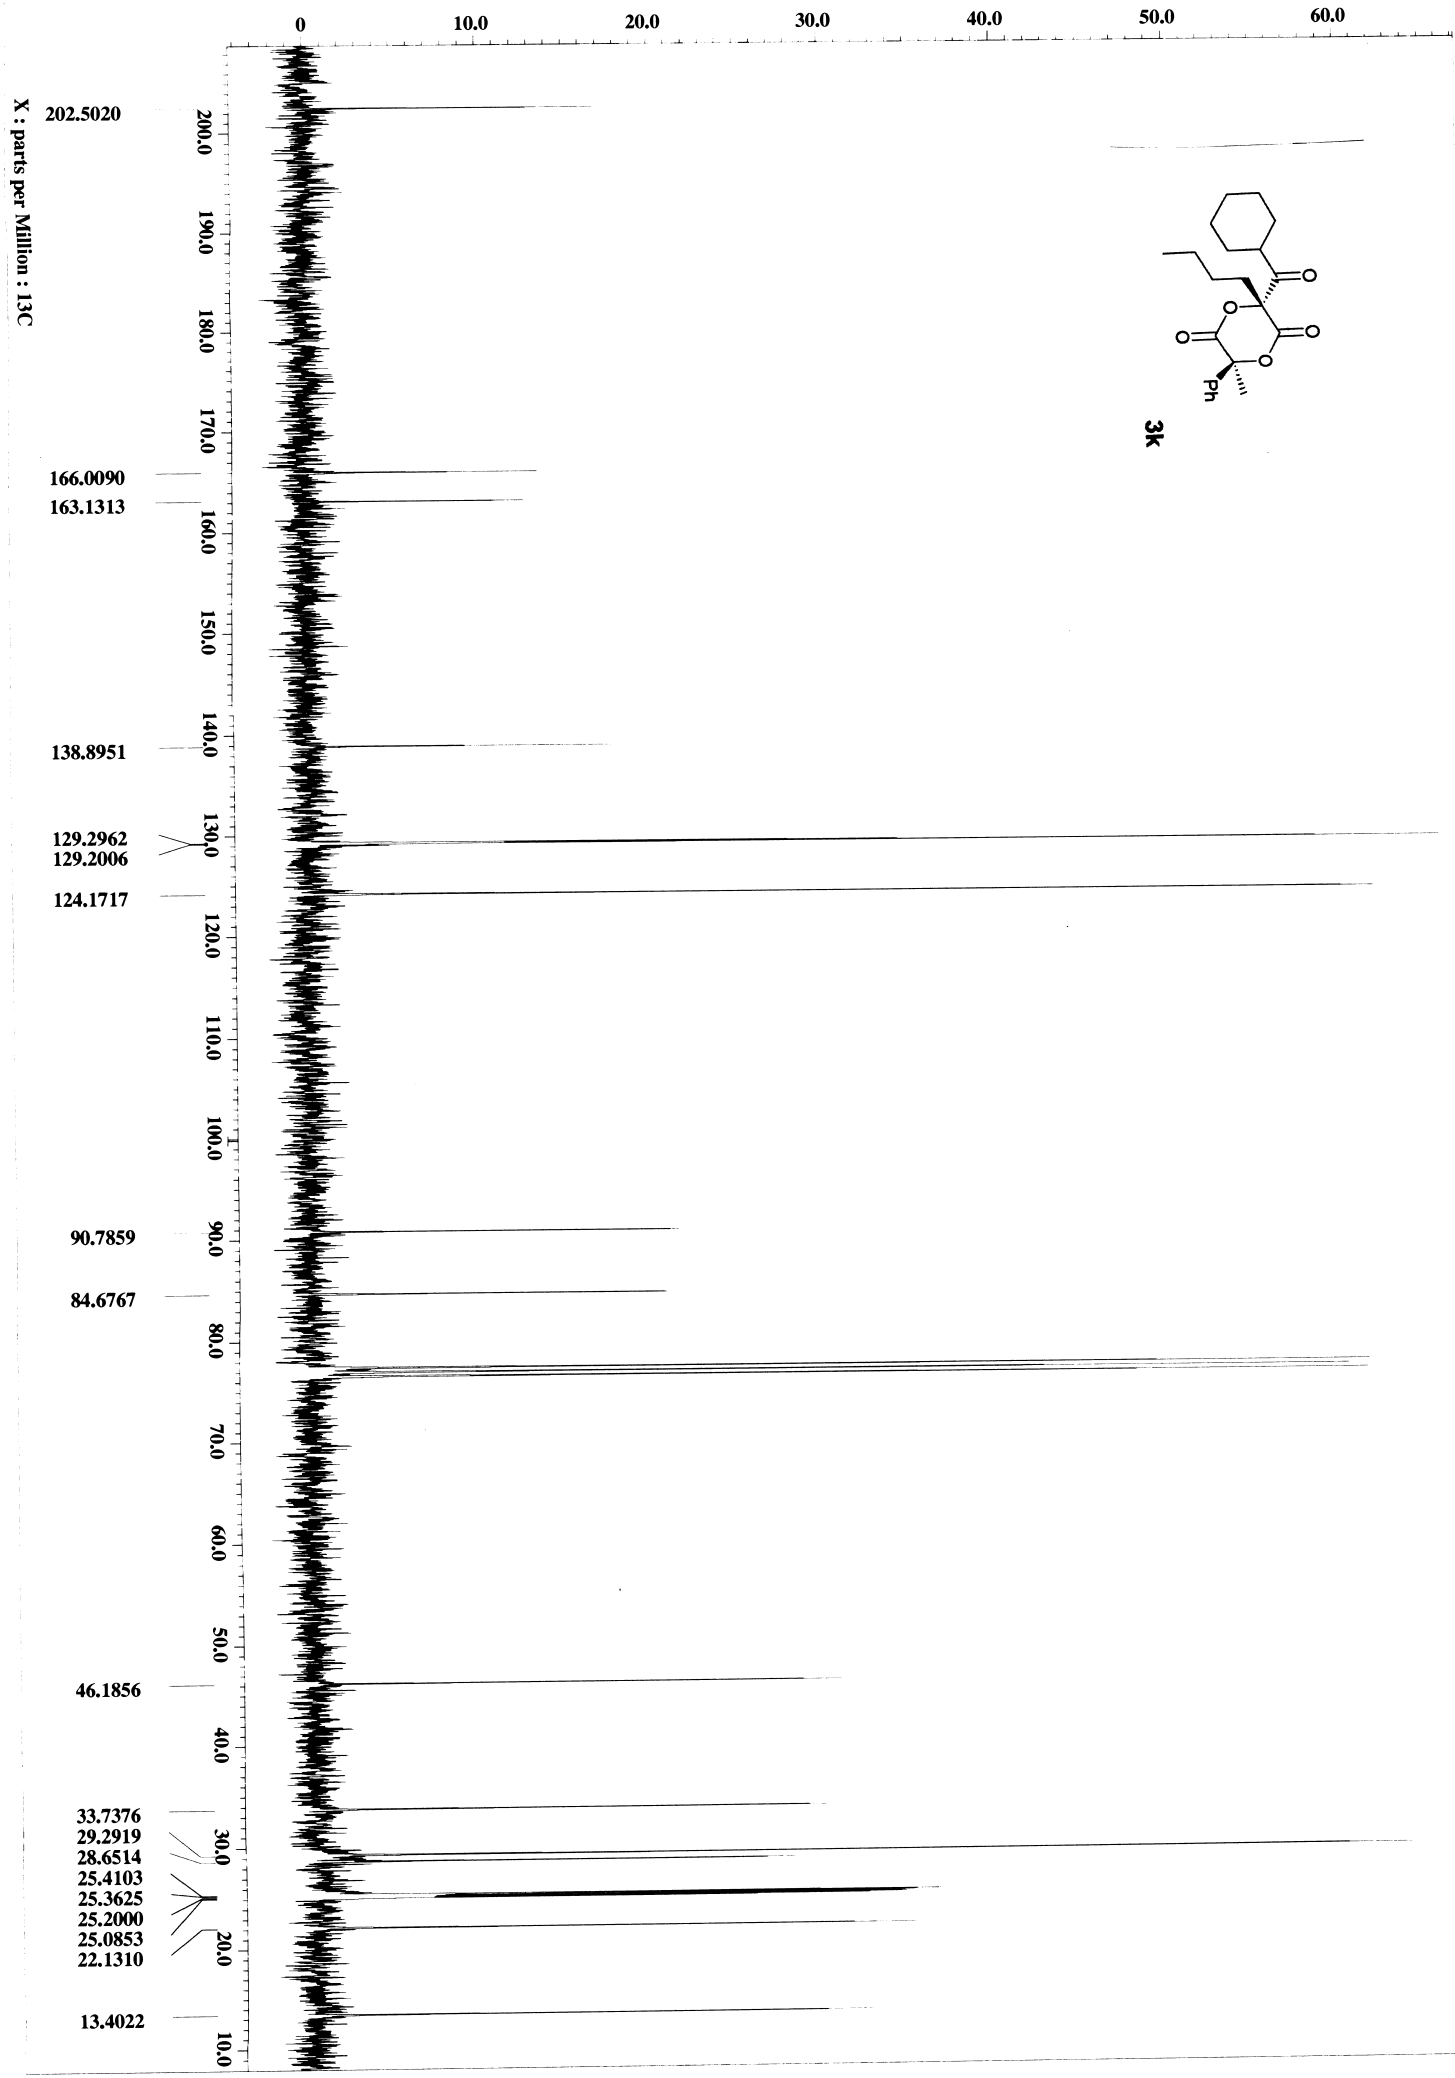

X : parts per Million : 1H

abundance

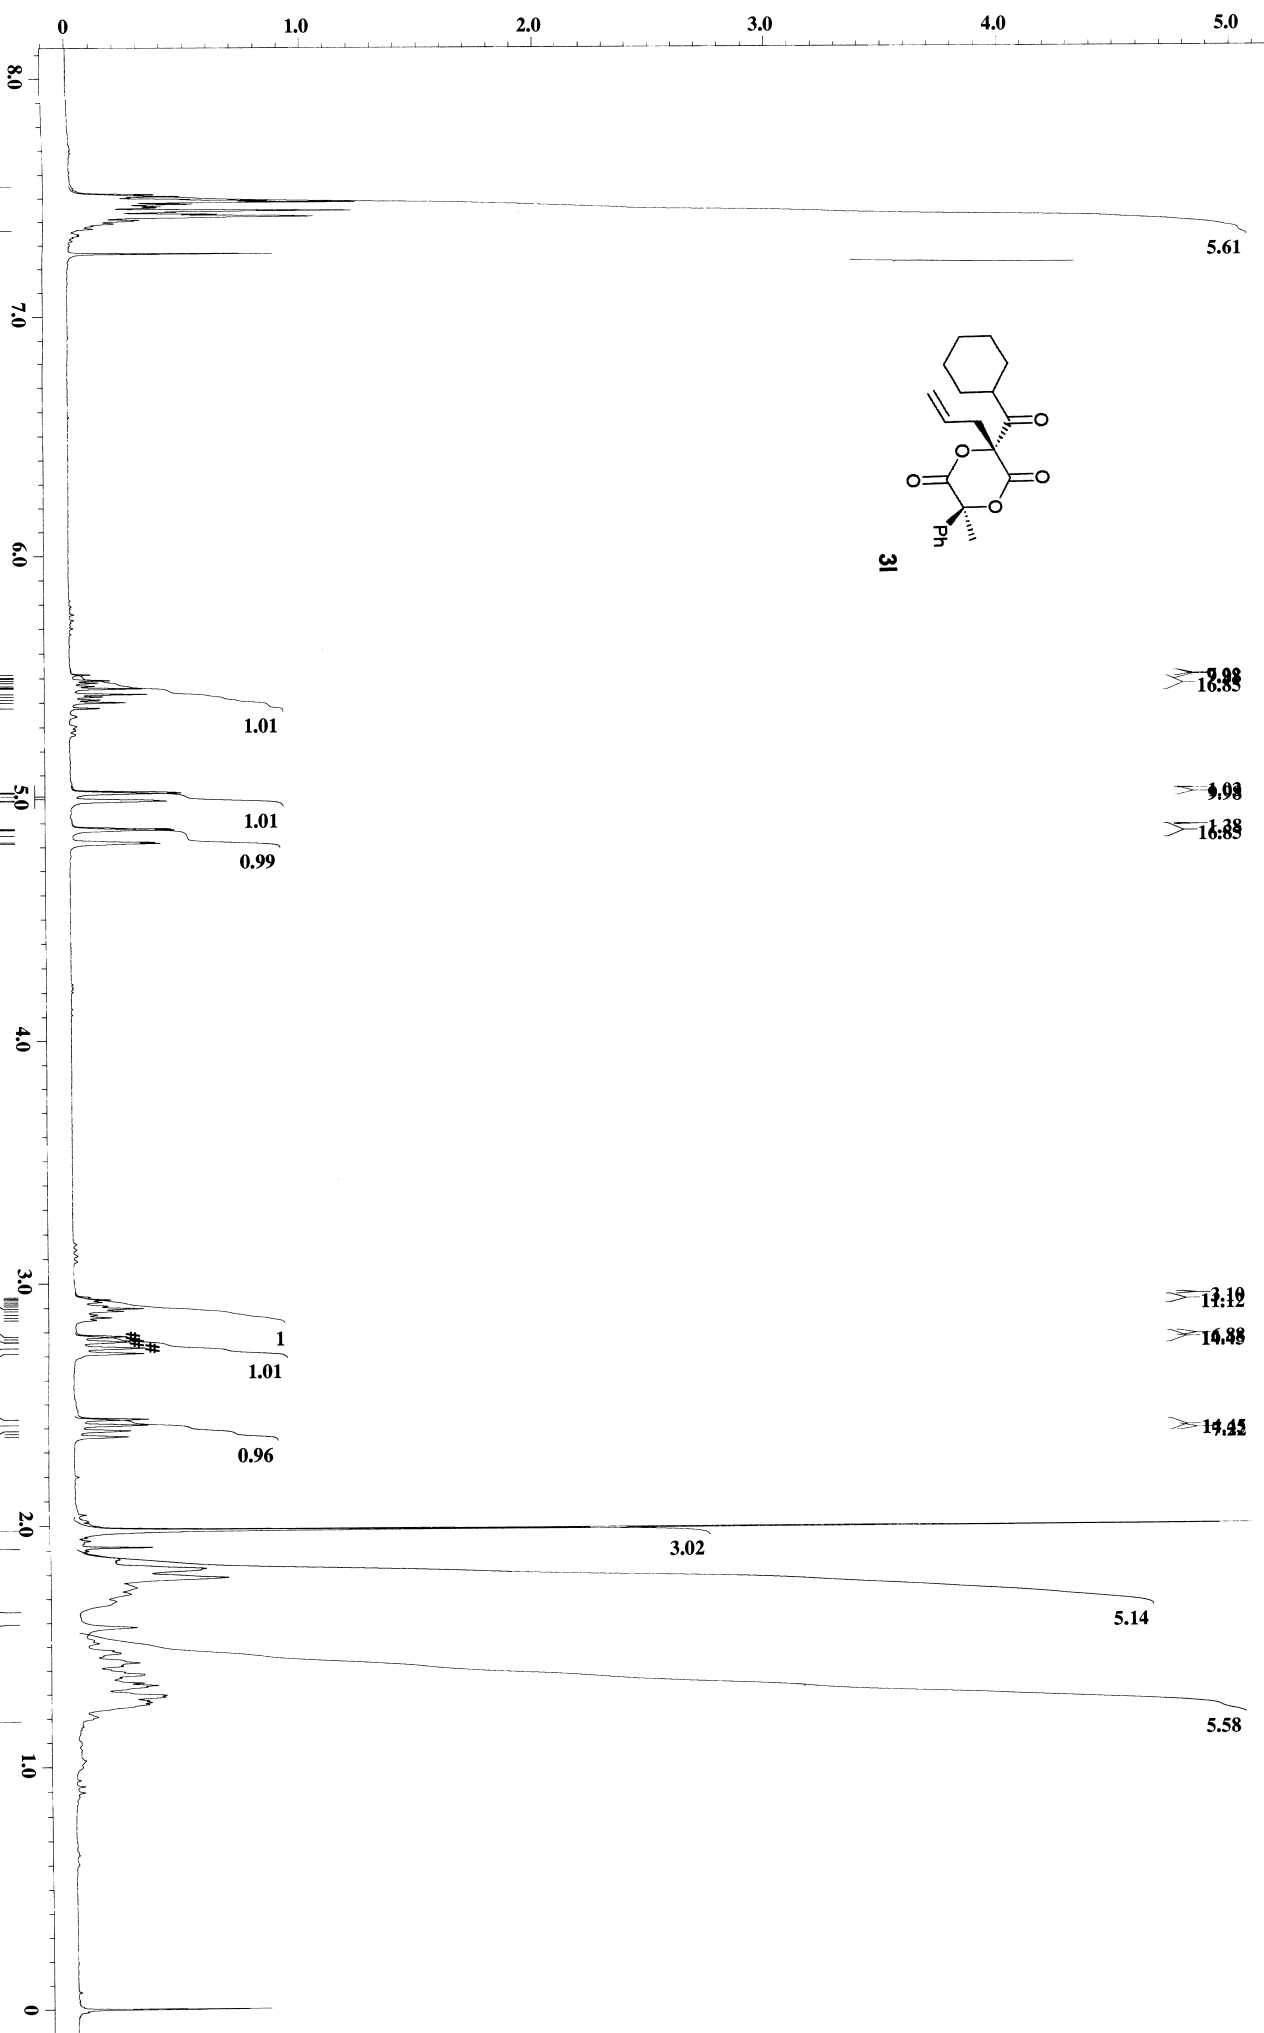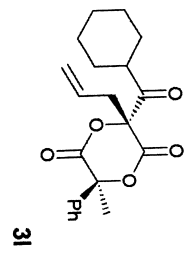

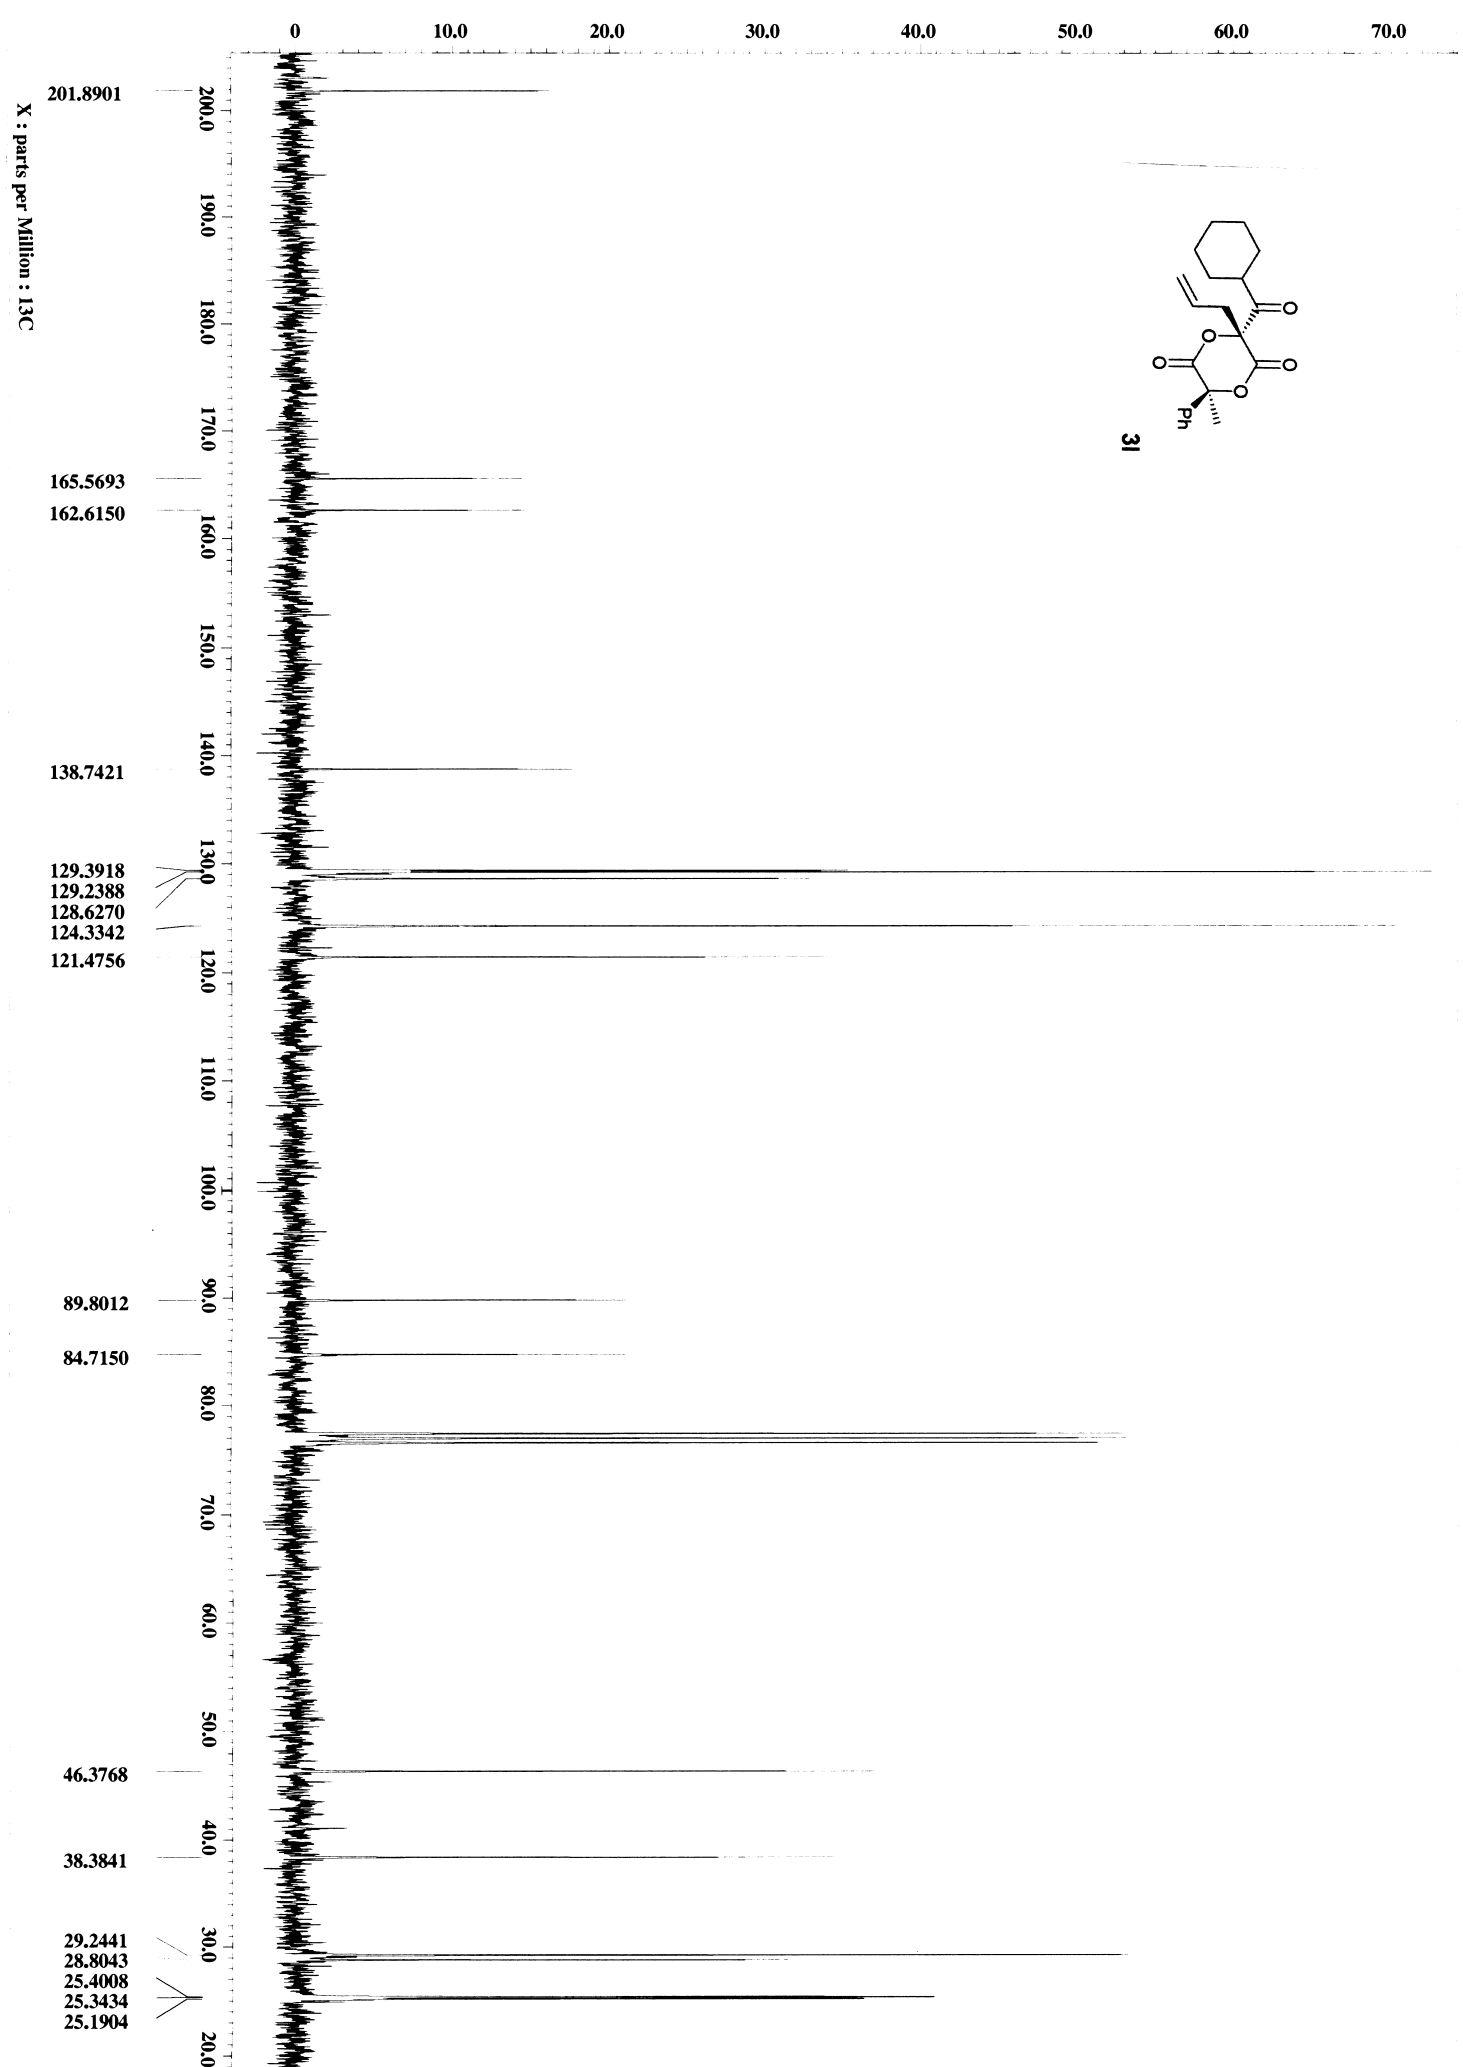

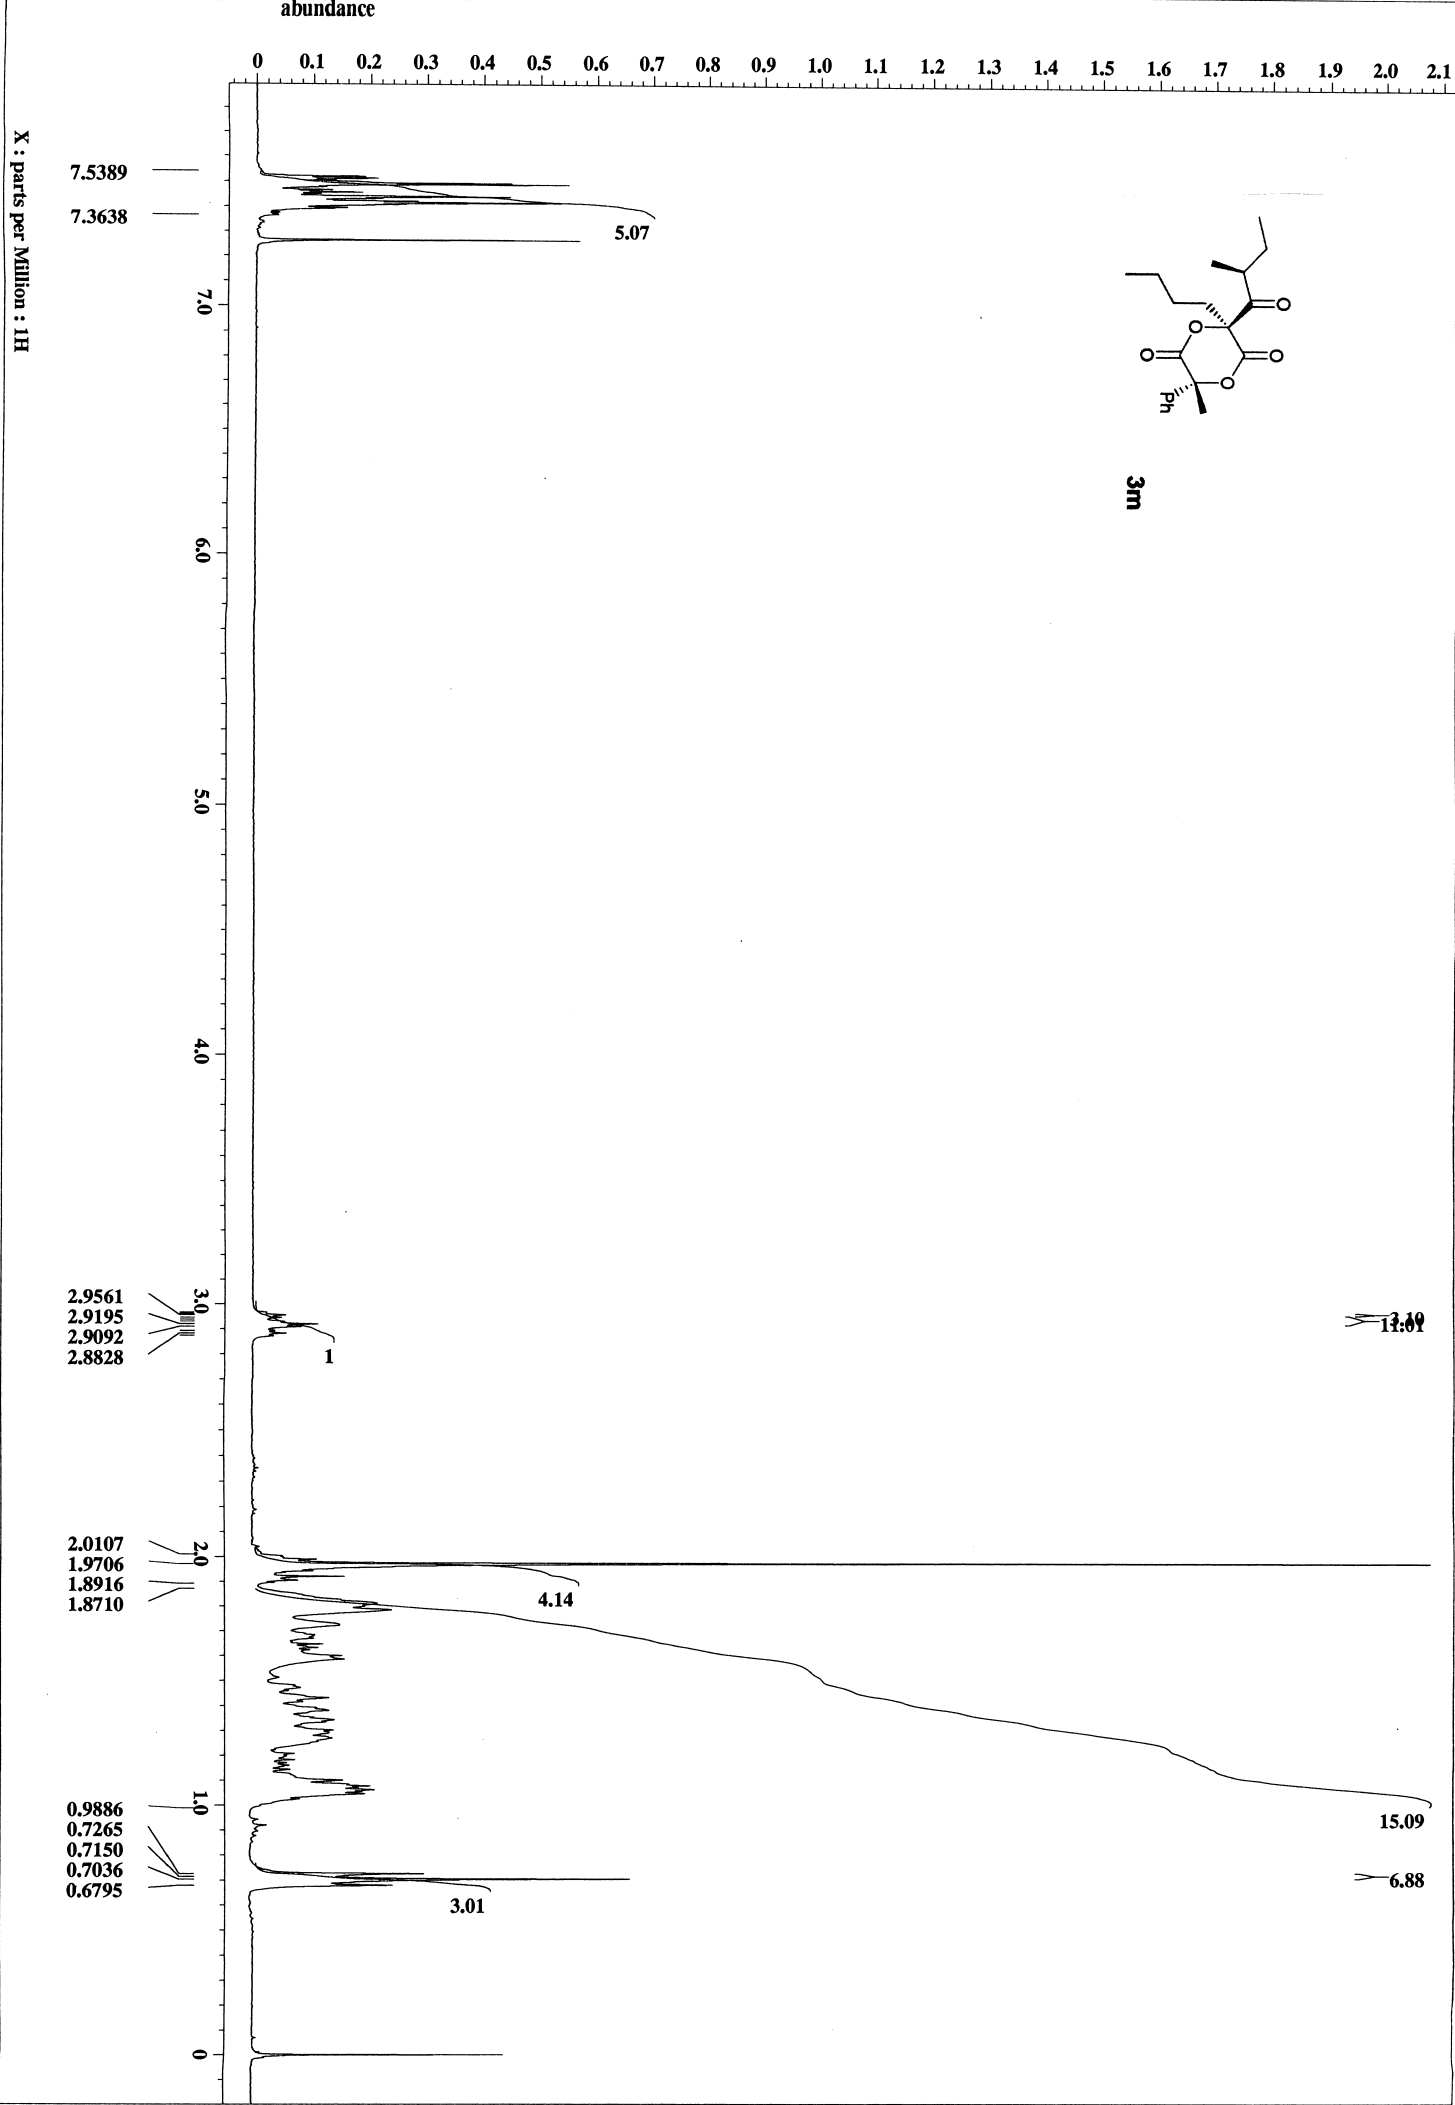

(thousandths)

X : parts per Million : 13C

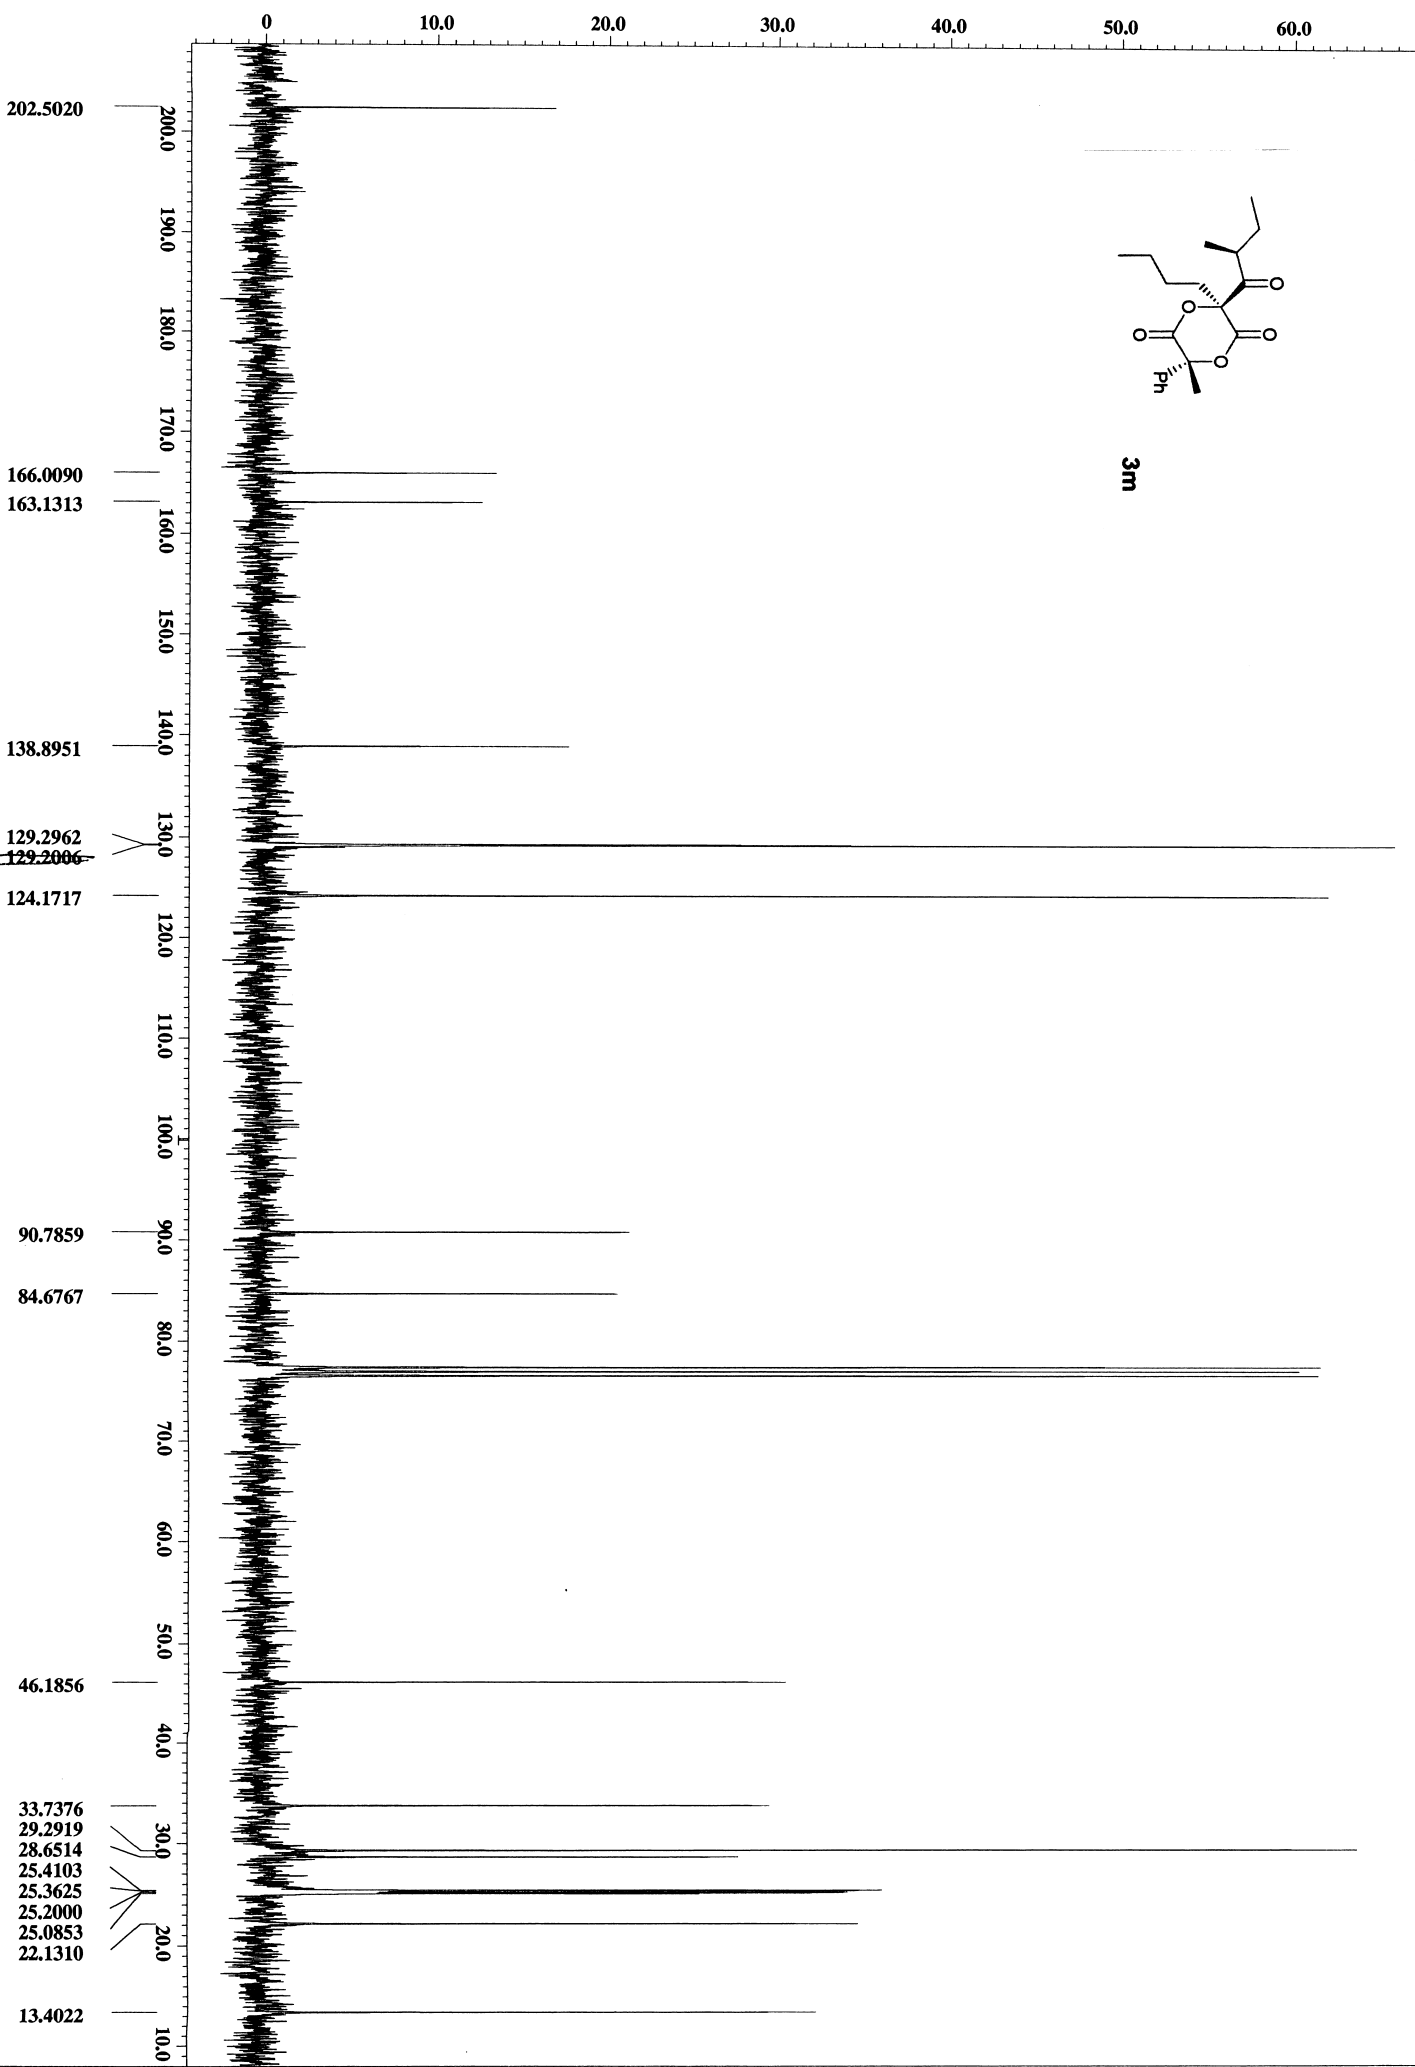



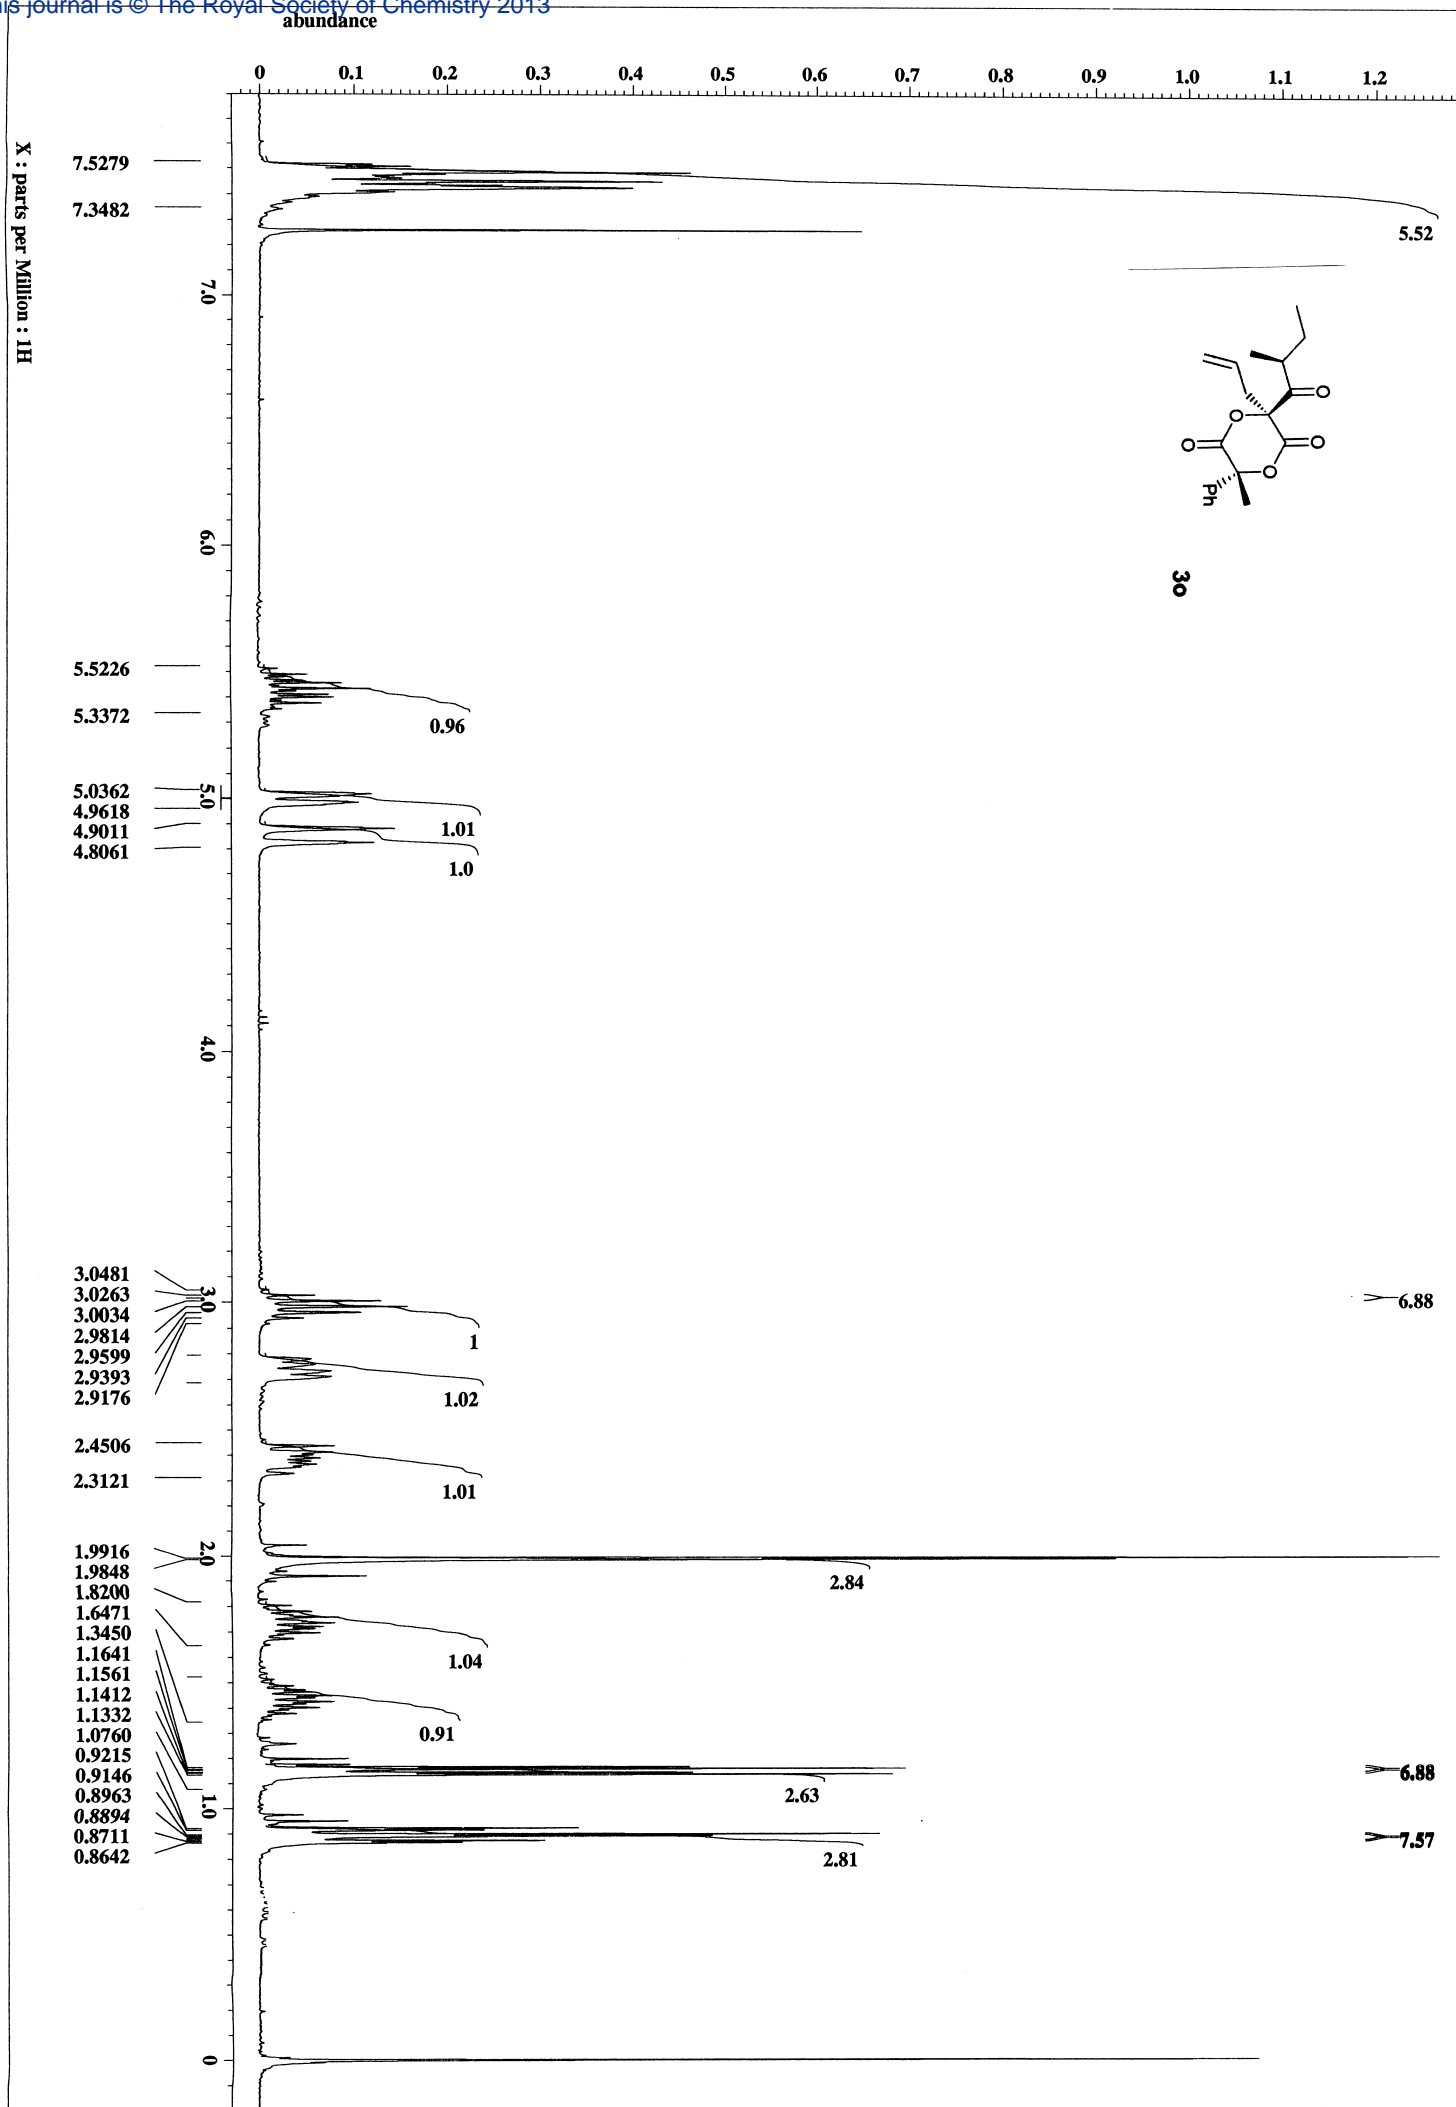

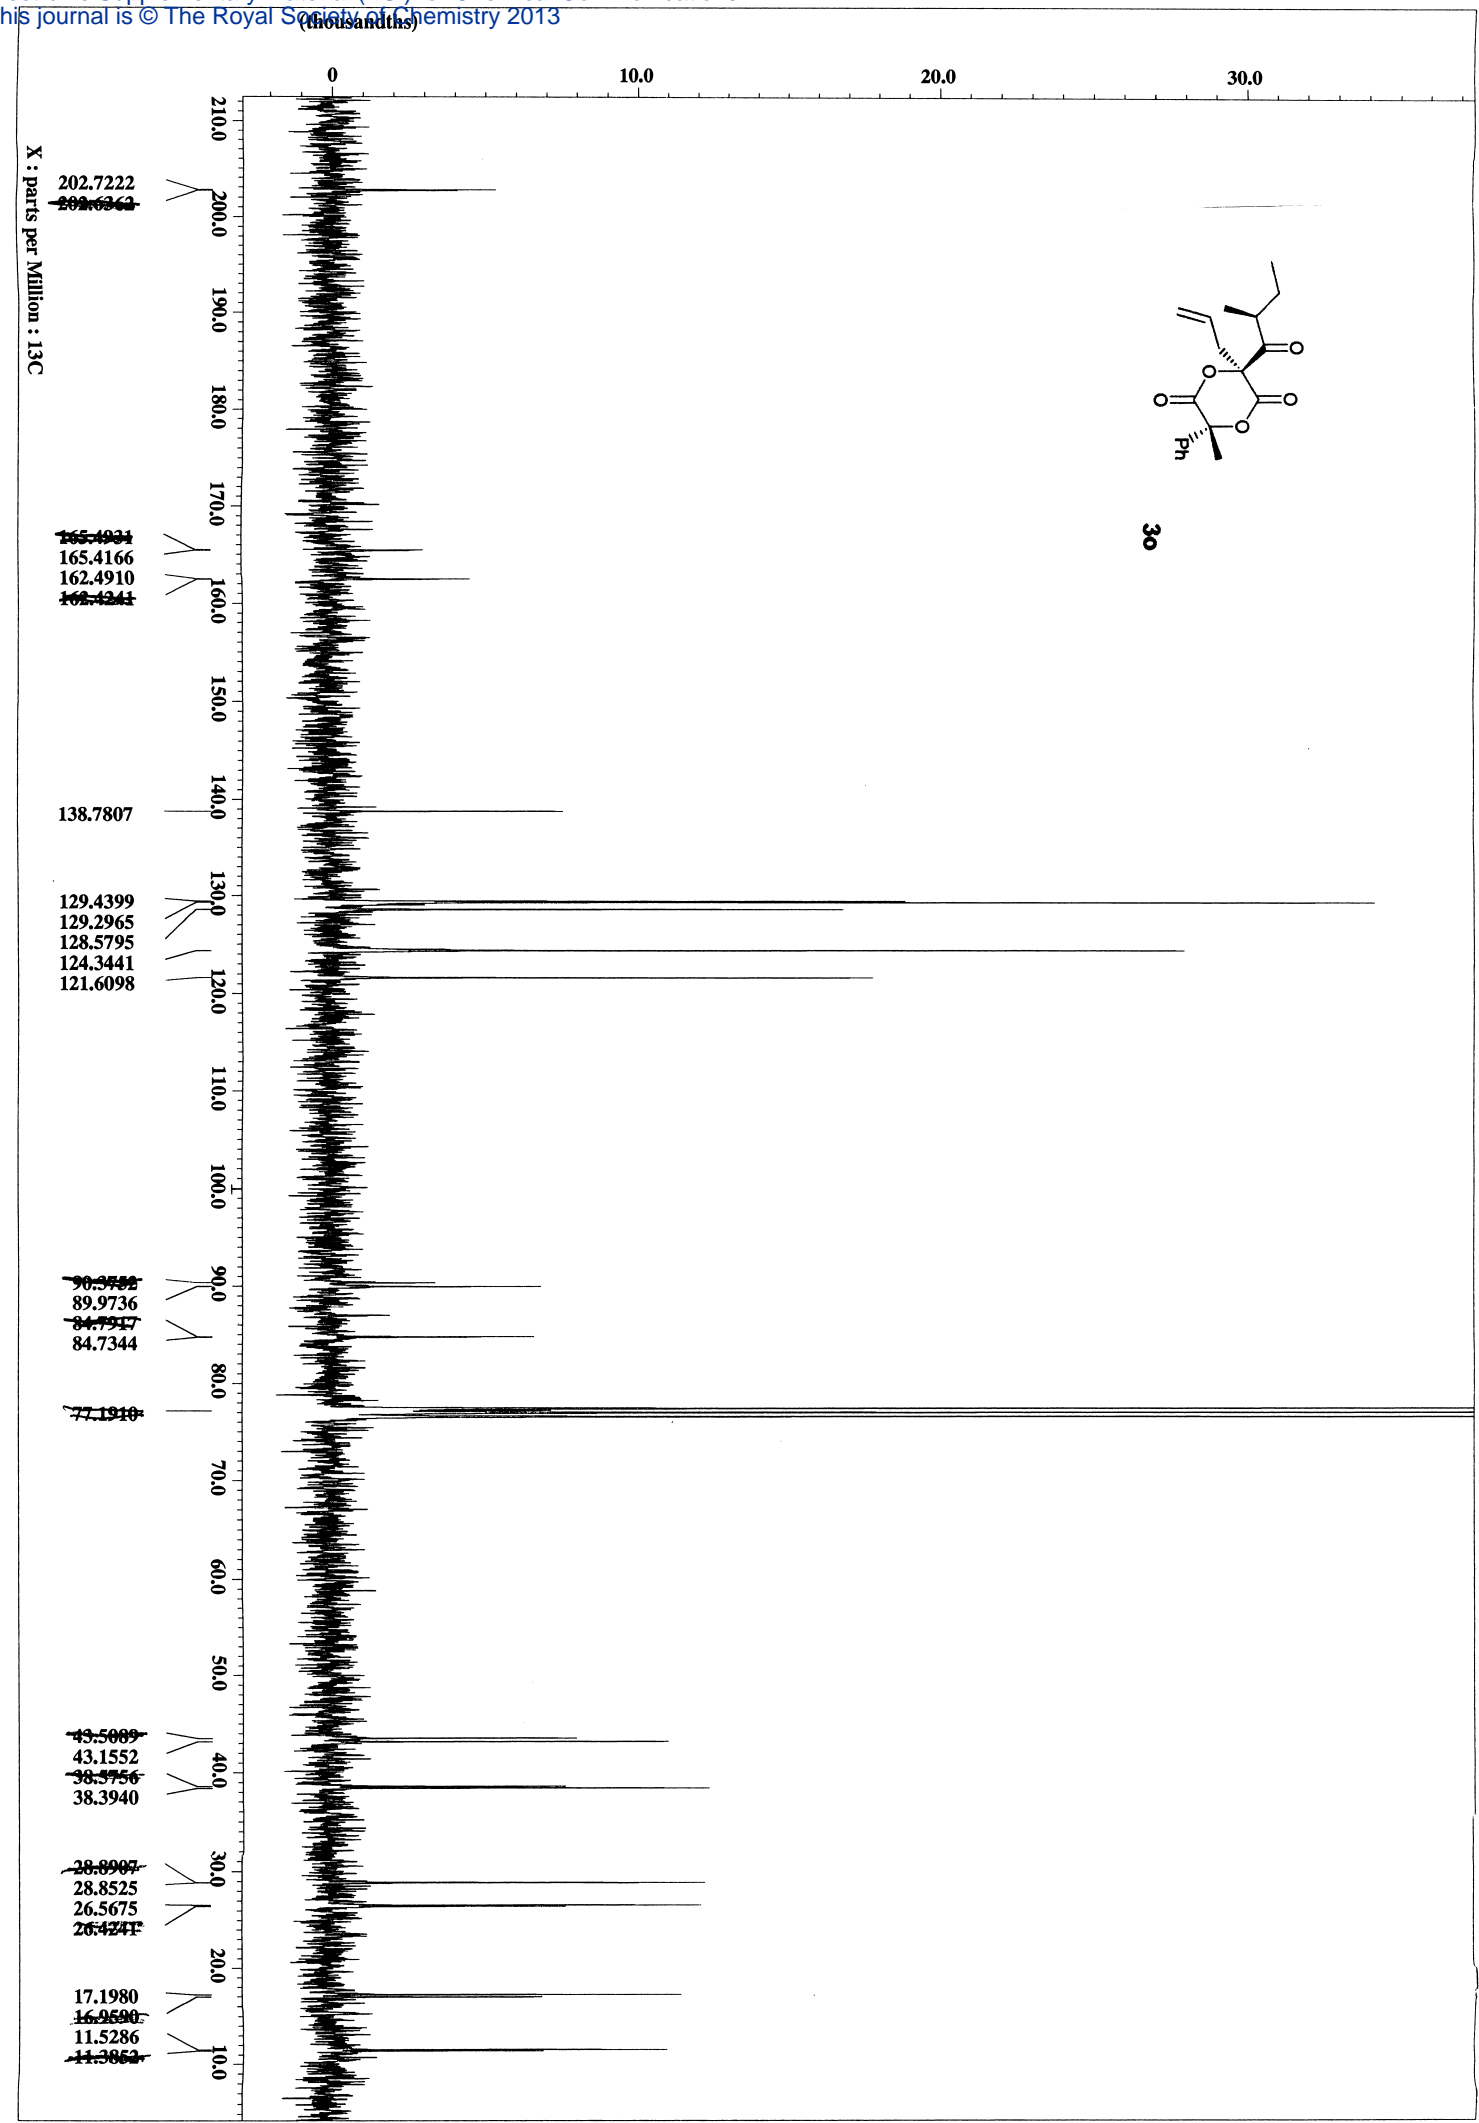

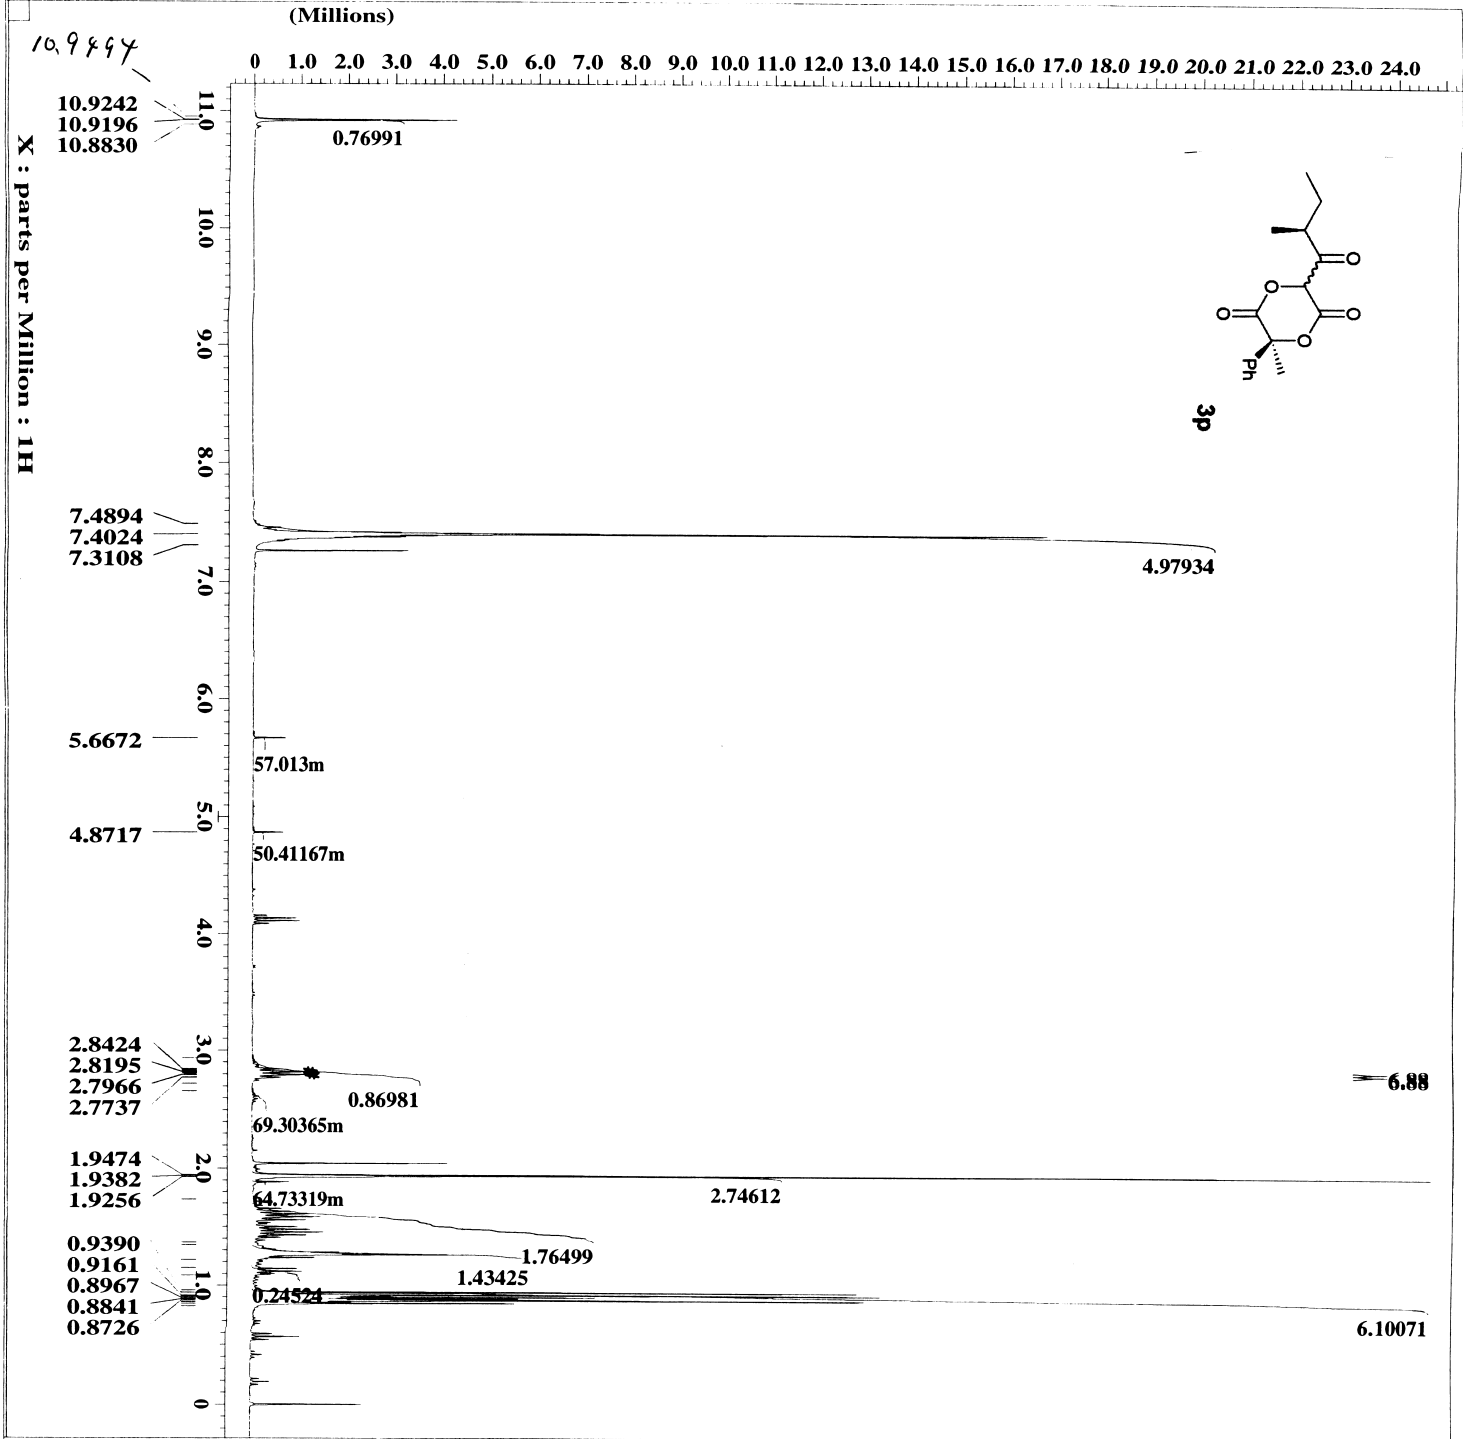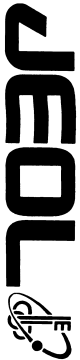

----- ACQUISITION PARAMETERS -----  
Derived from: single\_pulse.1327  
File Name = single\_pulse.1329  
Author =  
Sample ID = S#825616  
Content = single\_pulse  
Creation Date = 30-NOV-2005 22:59:01  
Revision Date = 30-NOV-2005 23:14:15  
Spec Site = ECA300 (2 JMT30-2)  
Spec Type = DELTA2 NMR  
Data Format = 1D COMPLEX  
Dimensions = X  
Dim Title = 1H  
Dim Size = 13107  
Dim Units = [ppm]  
Experiment = single\_pulse.ex2  
Probe\_id = 2692  
Temp\_get = 24.7 [dC]  
Spin\_get = 16 [Hz]  
Solvent = CHLOROFORM-D  
Recvr\_gain = 42  
Scans = 8  
X\_prescans = 0  
Digital Filter = TRUE  
Filter\_factor = 8  
X\_points = 16384  
X\_domain = 1H  
X\_offset = 5 [ppm]  
X\_freq = 300.52965592 [MHz]  
X\_sweep = 5.63570784 [kHz]  
X\_acq\_time = 2.90717696 [s]  
X\_resolution = 0.34397631 [Hz]  
Relaxation\_delay = 7.90717696 [s]  
X\_angle = 45 [deg]  
X\_90\_width = 10.6 [us]  
X\_pulse = 5.3 [us]  
X\_atn = 5.8 [dB]  
Dante\_Preset = FALSE  
Irr\_mode = OFF  
Irr\_domain = 1H  
Irr\_freq = 300.52965592 [MHz]  
Irr\_offset = 5 [ppm]  
Irr\_pwidth = 0.153 [ms]  
Dead\_time = 0 [us]  
Delay = 0 [us]  
Tr1\_mode = OFF  
Tr1\_domain = 1H  
Tr1\_freq = 300.52965592 [MHz]  
Tr1\_offset = 5 [ppm]  
Tr1\_pwidth = 1 [us]  
Obs\_pwidth = 1 [us]  
Qu1\_pwidth = 1 [us]  
Sex\_pwidth = 1 [us]  
Sep\_pwidth = 1 [us]  
Oct\_pwidth = 1 [us]  
Non\_pwidth = 1 [us]  
Dec\_pwidth = 1 [us]

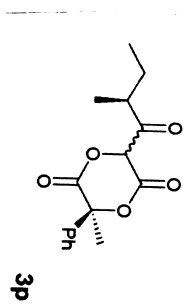

```

---- ACQUISITION PARAMETERS ----
Acquired from: single_pulse_dec_copy.23
File Name      = single_pulse_dec_copy.
Author         =
Sample ID      = S#826804
Content        = single_pulse_decoupled
Creation Date   = 30-NOV-2005 23:29:43

Revision Date   = 30-NOV-2005 23:30:56
Spec Size      = ECA300 (2 DMT30-2)

Spec Type      = DELTA2 NMR
Data Format     = ID COMPLEX
Dimensions     = X
Dim Title      = 13C
Dim Size       = 13107
Dim Units      = [ppm]
Experiment      = single_pulse_dec
Probe_id       = 2692
Temp_get       = 24.8(dC)
Spin_get       = 14 [Hz]
Solvent        = CHLOROFORM-D
Recvr_gain     = 60
Scaans         = 591
X prescans     = 4
Digital filter = TRUE
P1filter_factor = 8
X_points       = 16384
X_domain       = 13C
X_offset       = 100 [ppm]
X_freq         = 75.56823426 [MHz]
X_sweep        = 23.67424242 [kHz]
X_acq_time     = 0.692006016[s]
X_resolution   = 1.444961091[Hz]
Relaxation_delay = 2[s]
Repetition_time = 2.63206016[s]
X_angle        = 30[deg]
X_90_width     = 9.6 [us]
X_pulse        = 3.2 [us]
X_atn          = 8.6 [dB]
X_atn_time     = 2[us]
Non_time       = TRUE
Decoupling     = 1H
Irr_domain     = 300.52965592 [MHz]
Irr_freq       = 5 [ppm]
Irr_offset     = 0.153 [ms]
Irr_pwidth     = 28.8 [ds]
Irr_atn_dec    = 28.8 [ds]
Irr_noise      = WALTZ
Dead_time      = 0[us]
Delay          = 0[us]
Tri_pwidth     = 1[us]
Obs_pwidth     = 1[us]
Qui_pwidth     = 1[us]
Sex_pwidth     = 1[us]
Sep_pwidth     = 1[us]
Oct_pwidth     = 1[us]
Non_pwidth     = 1[us]
Dec_pwidth     = 1[us]

```

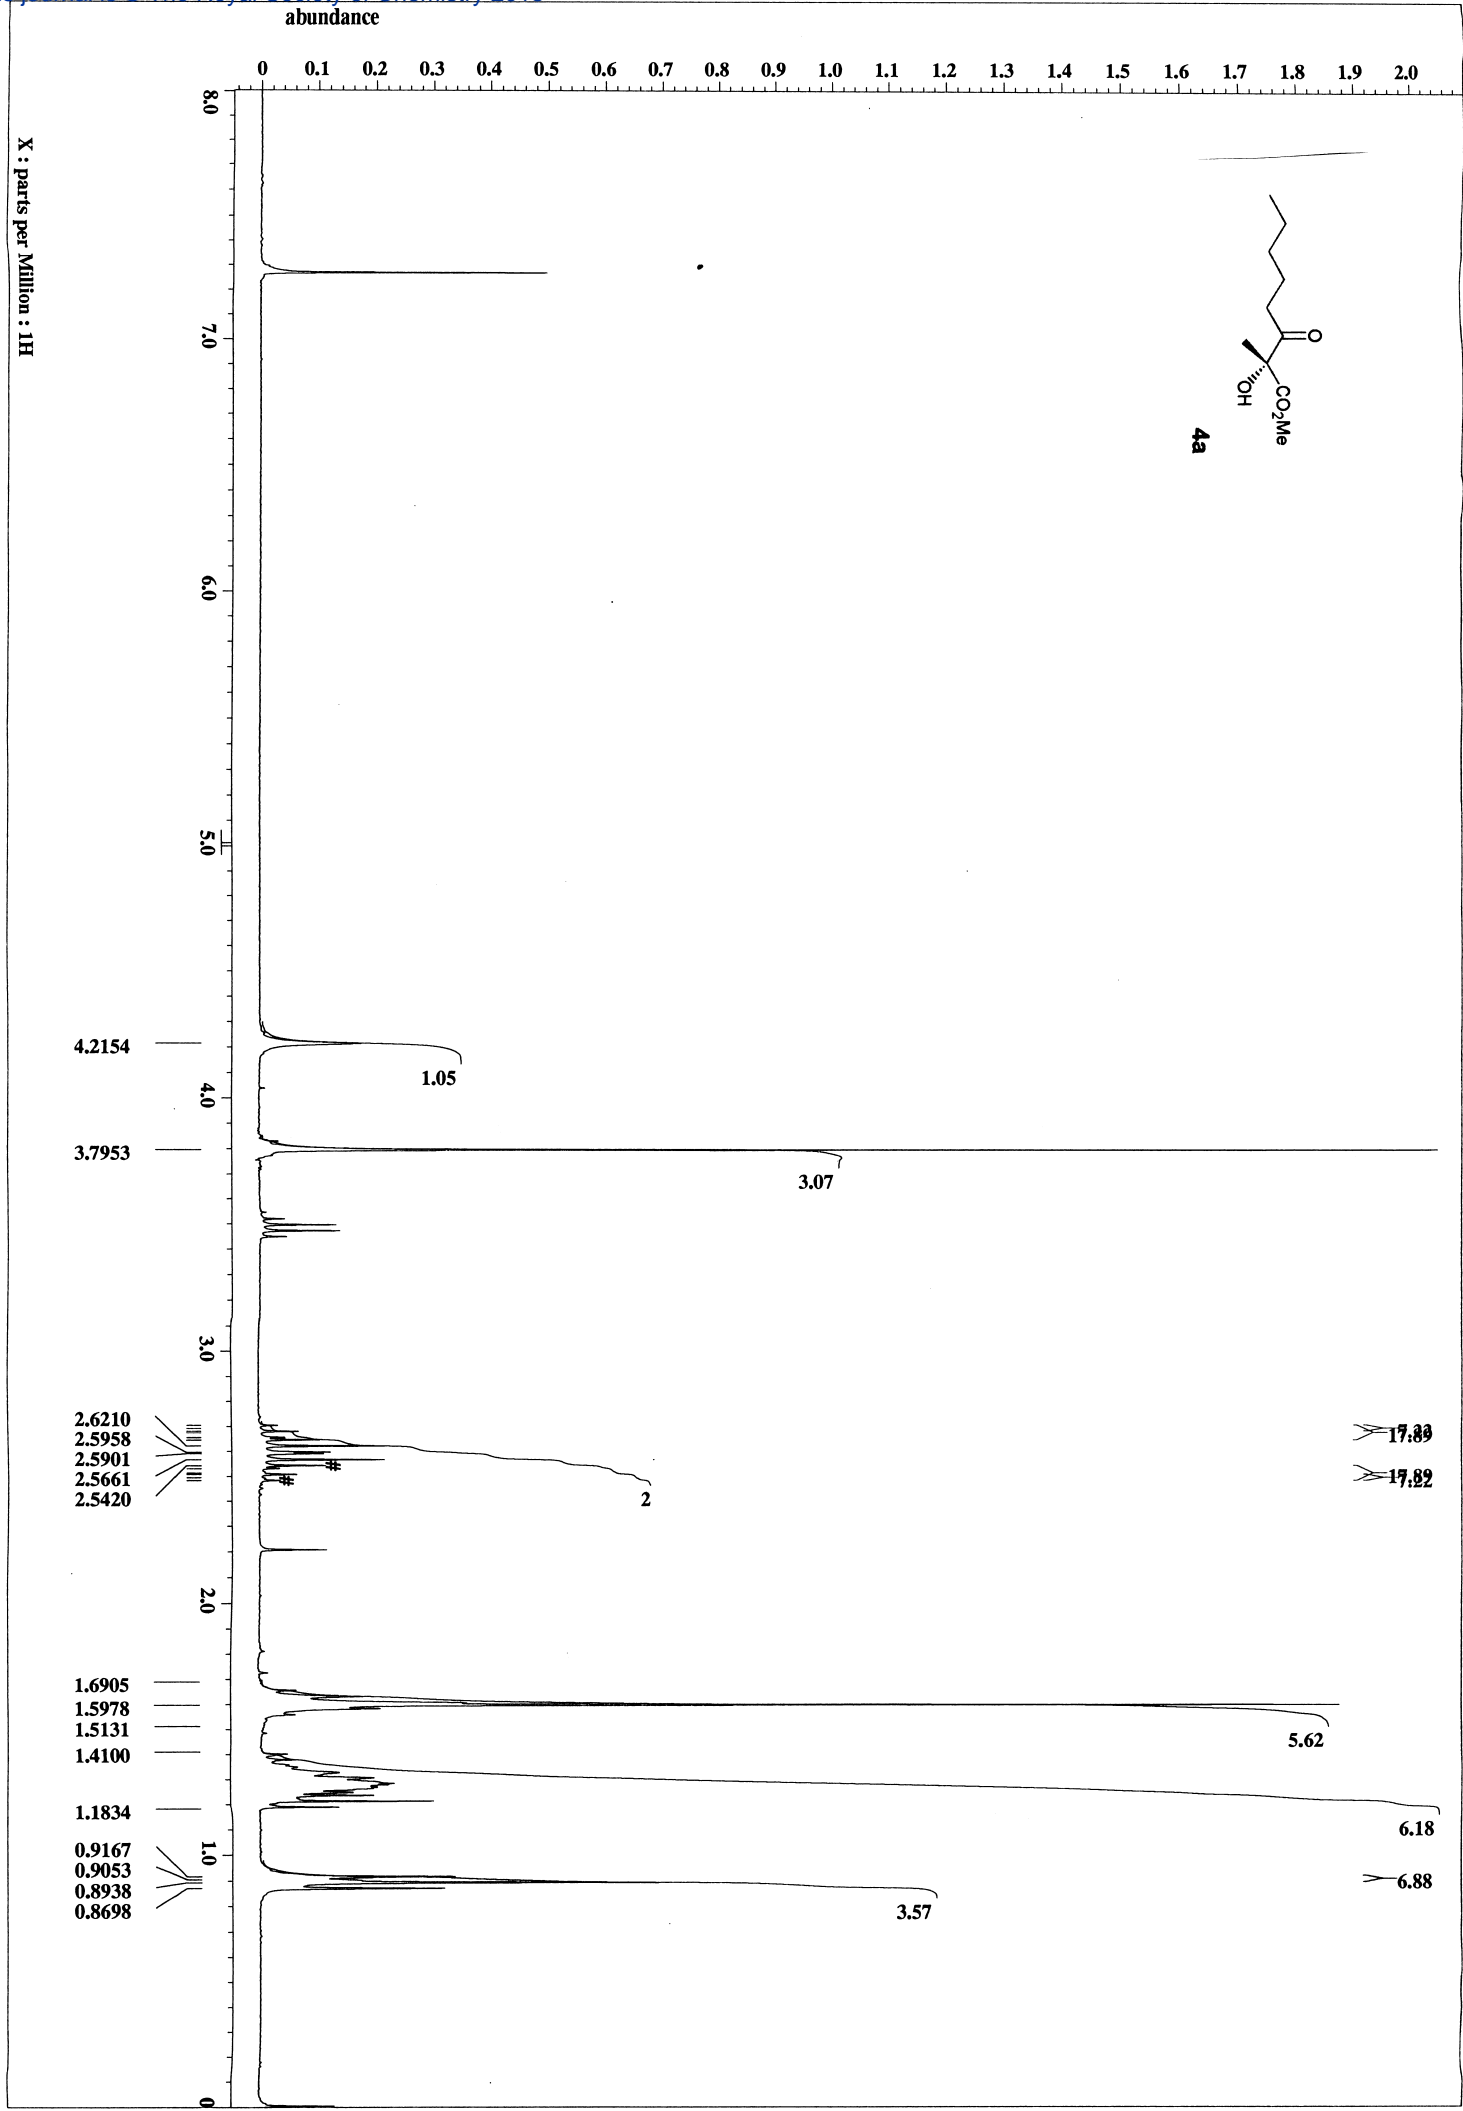

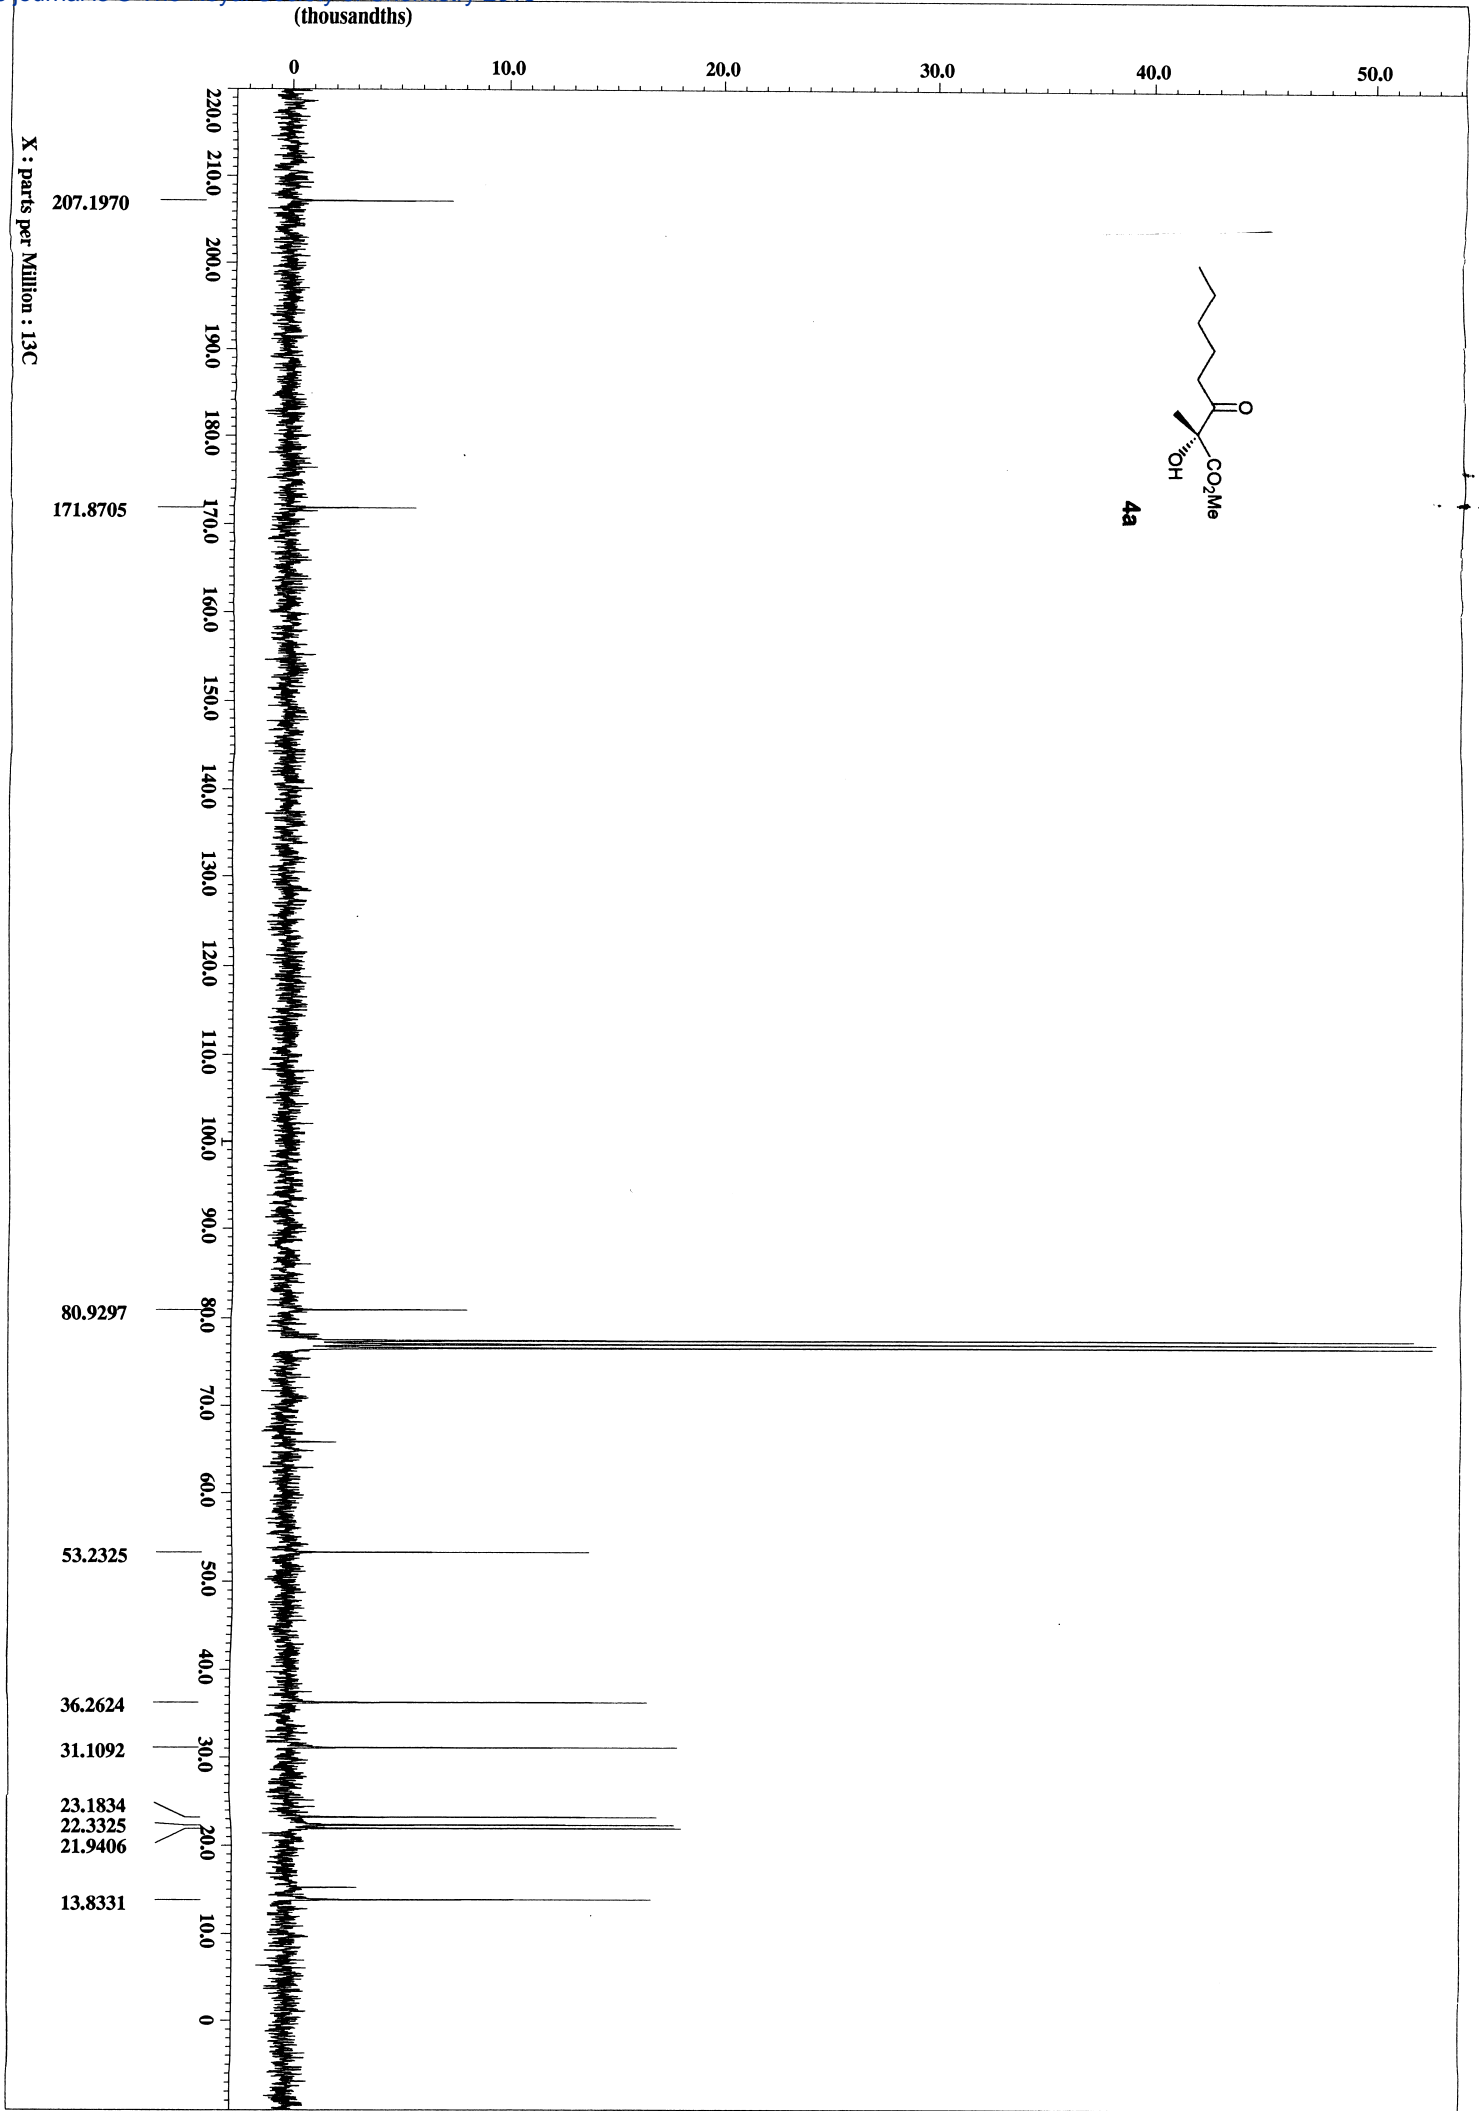

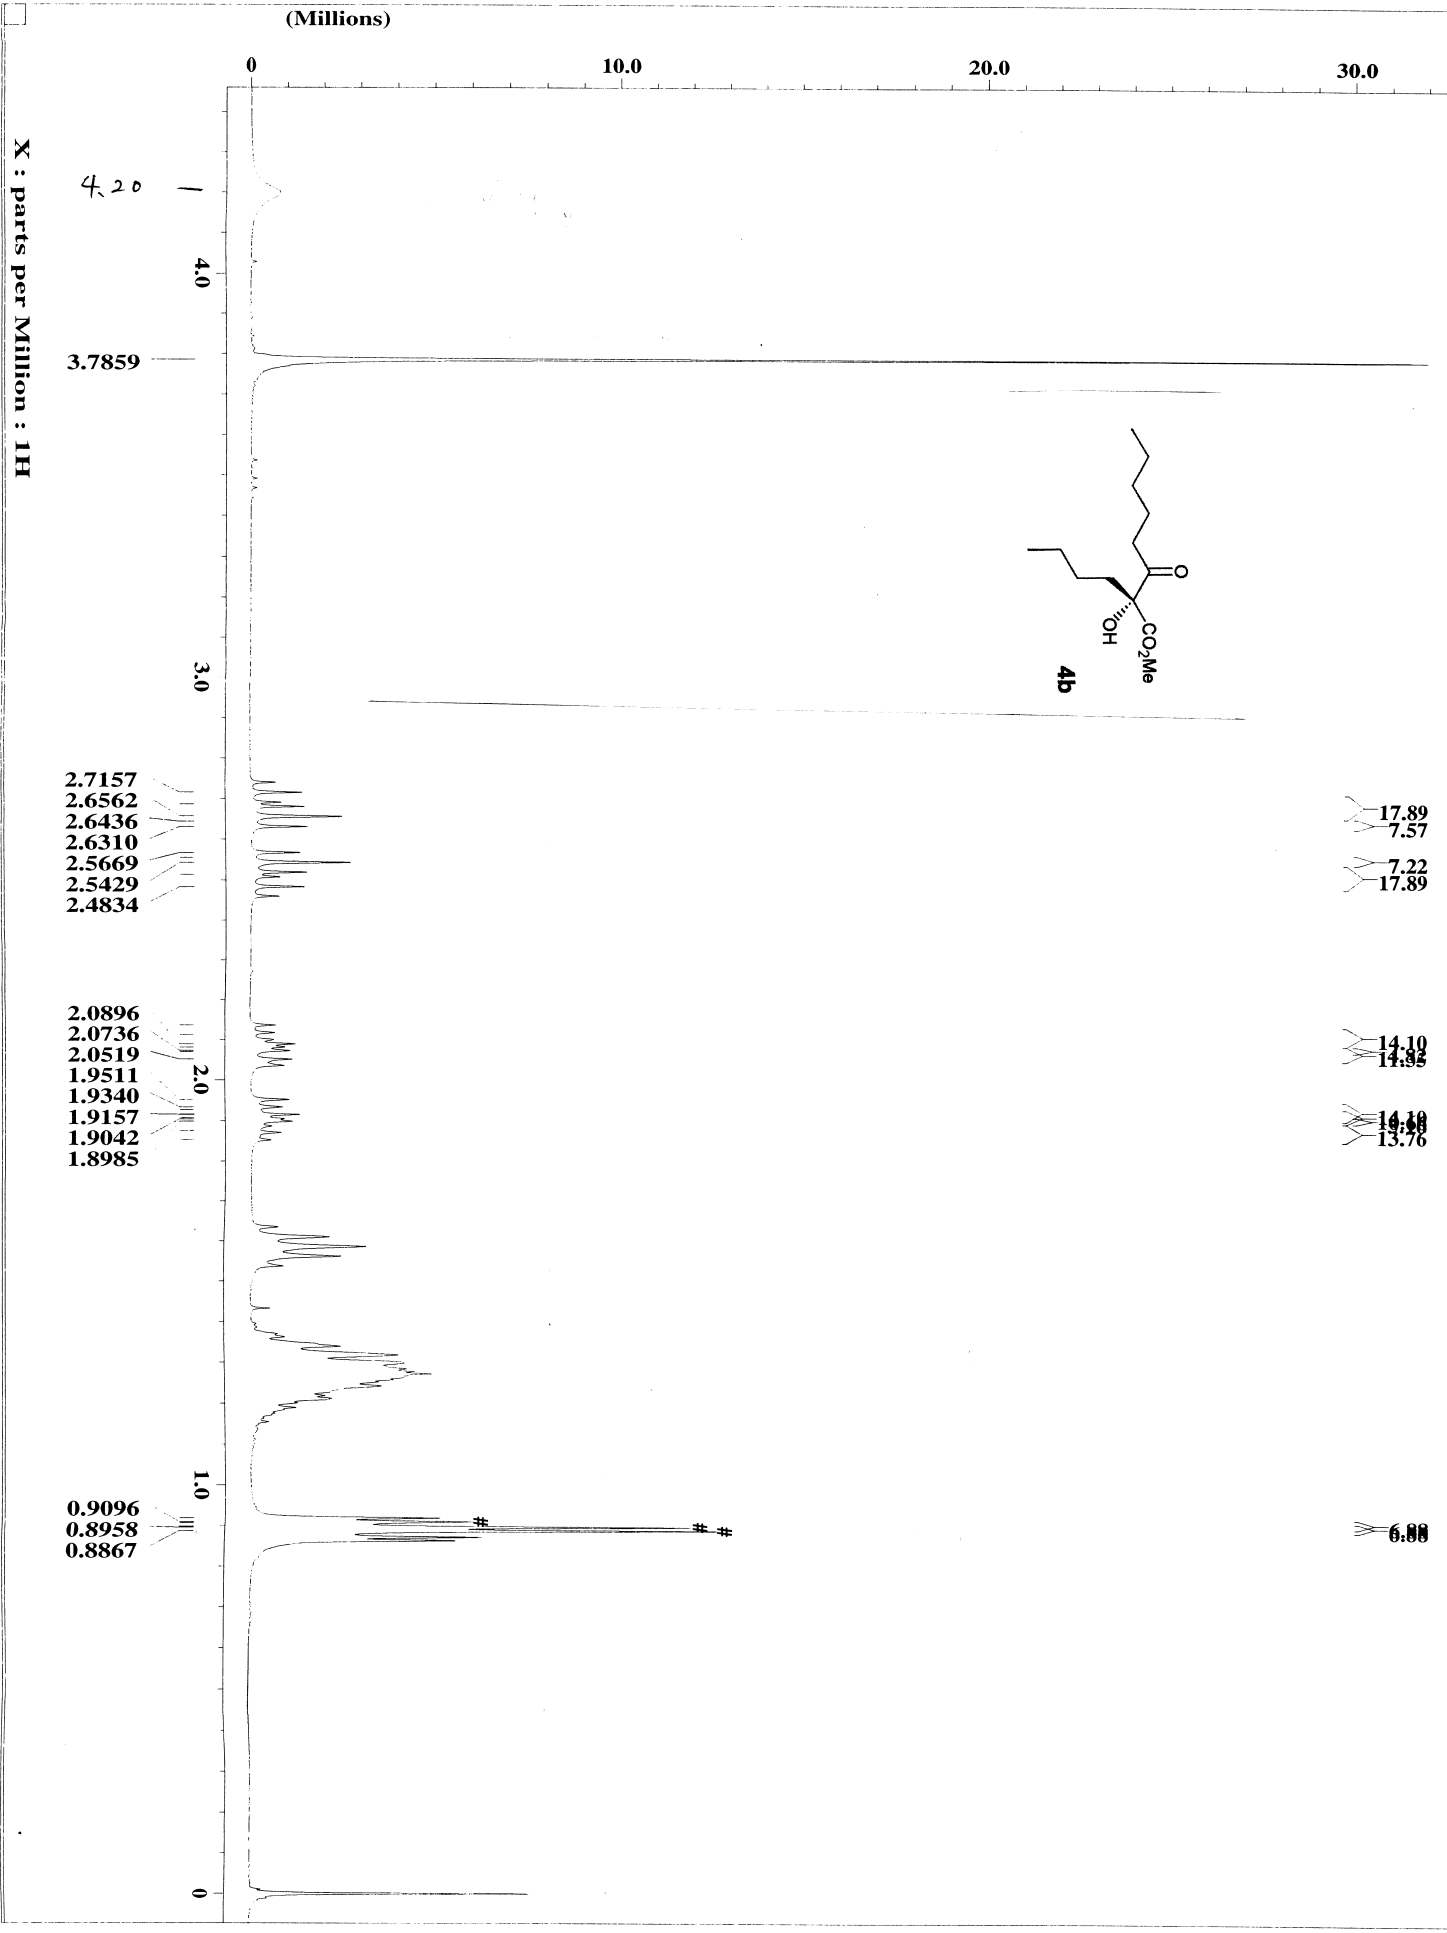

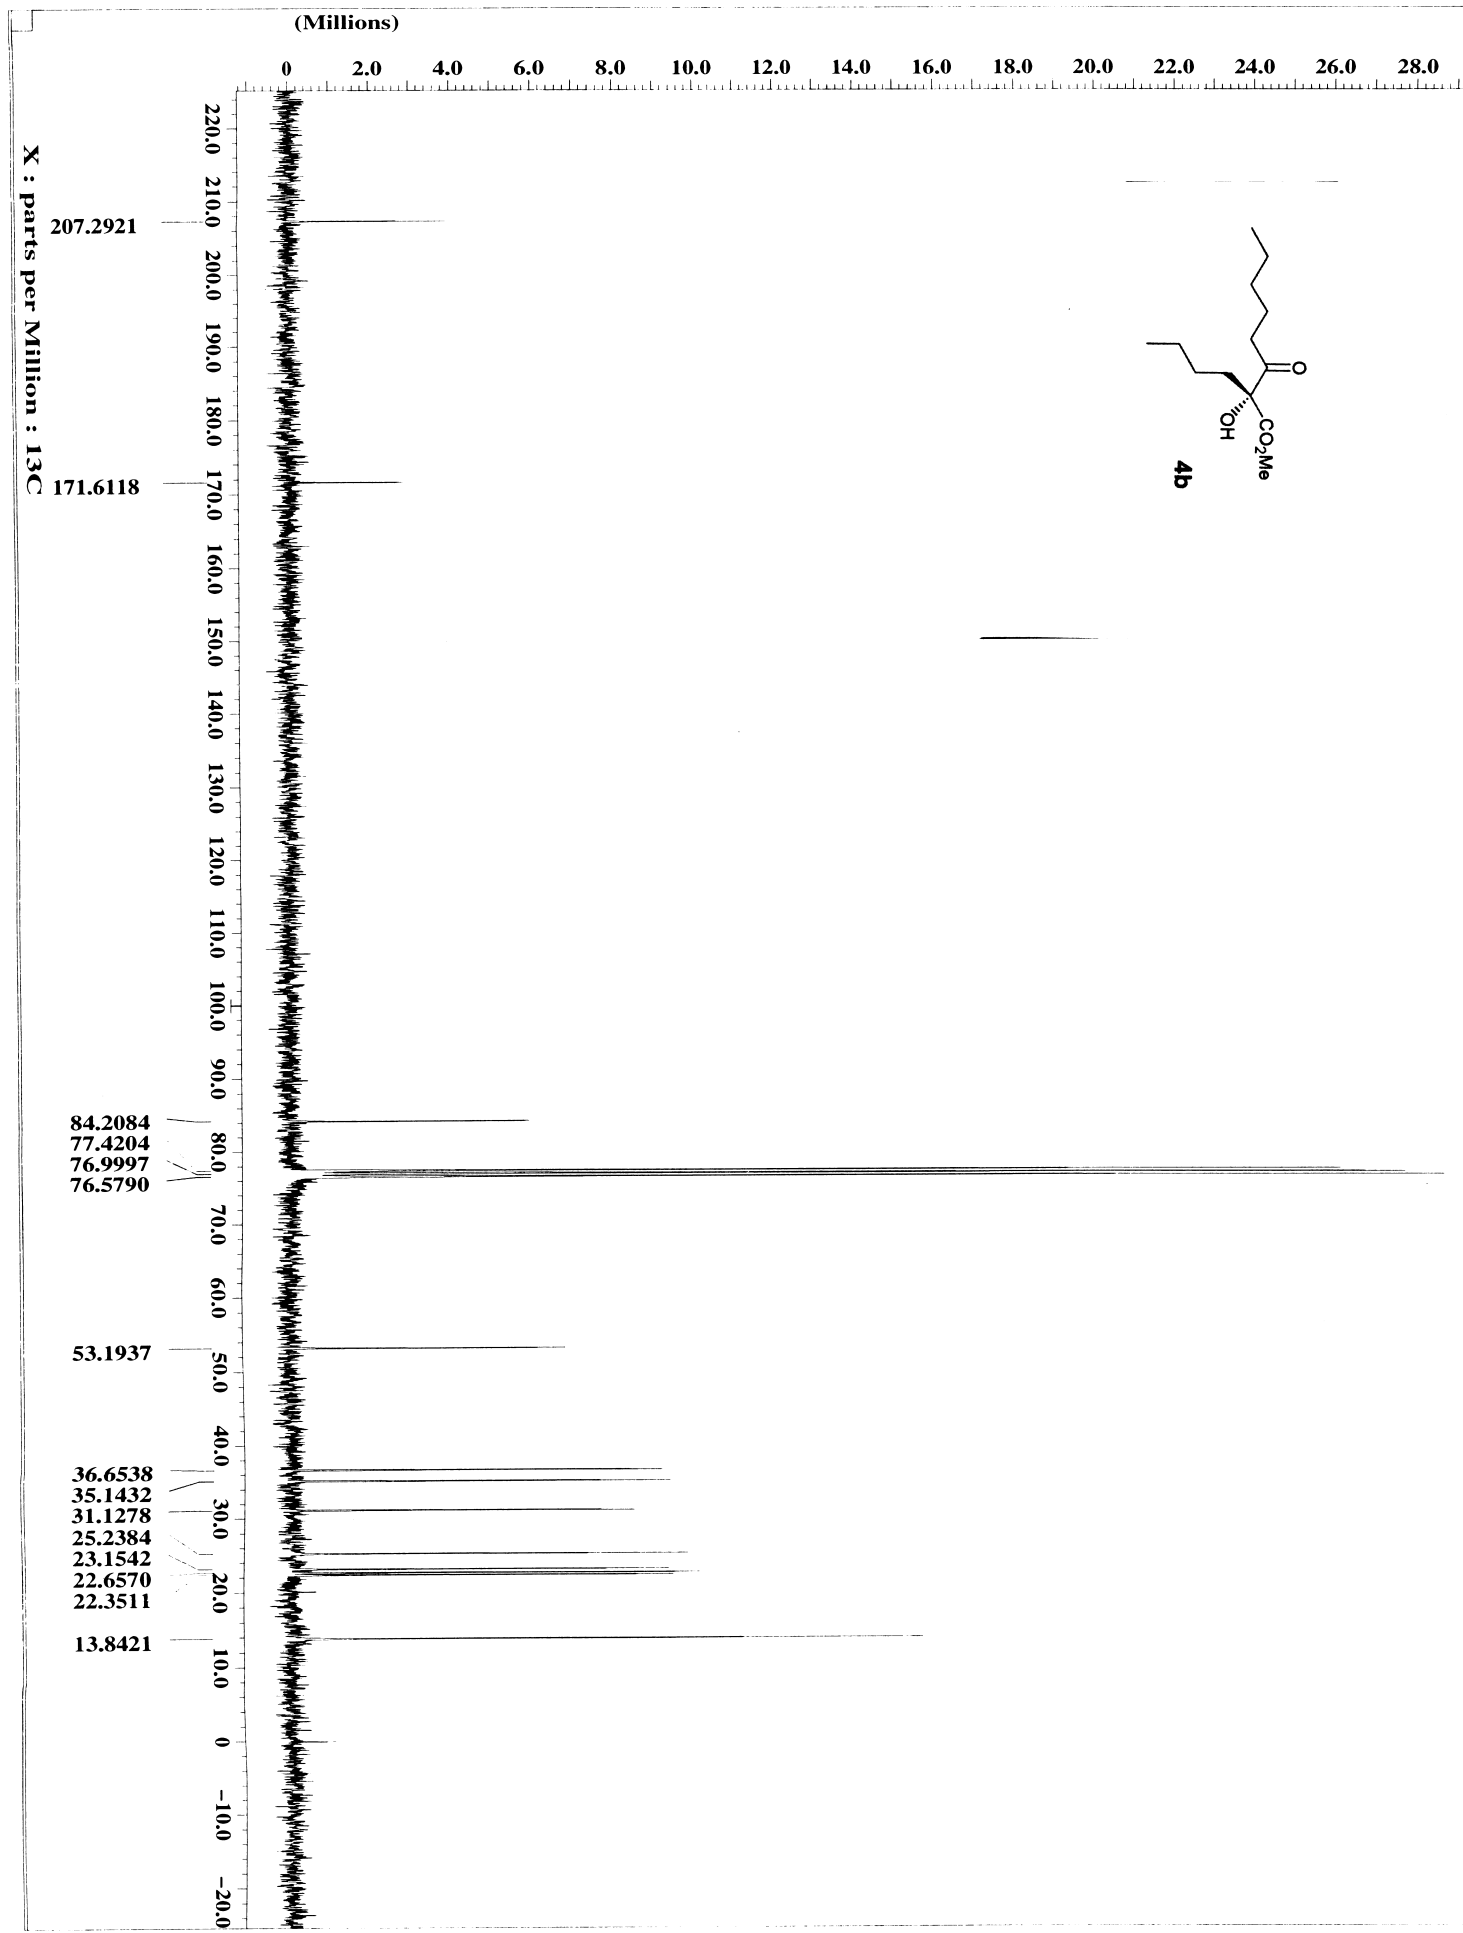



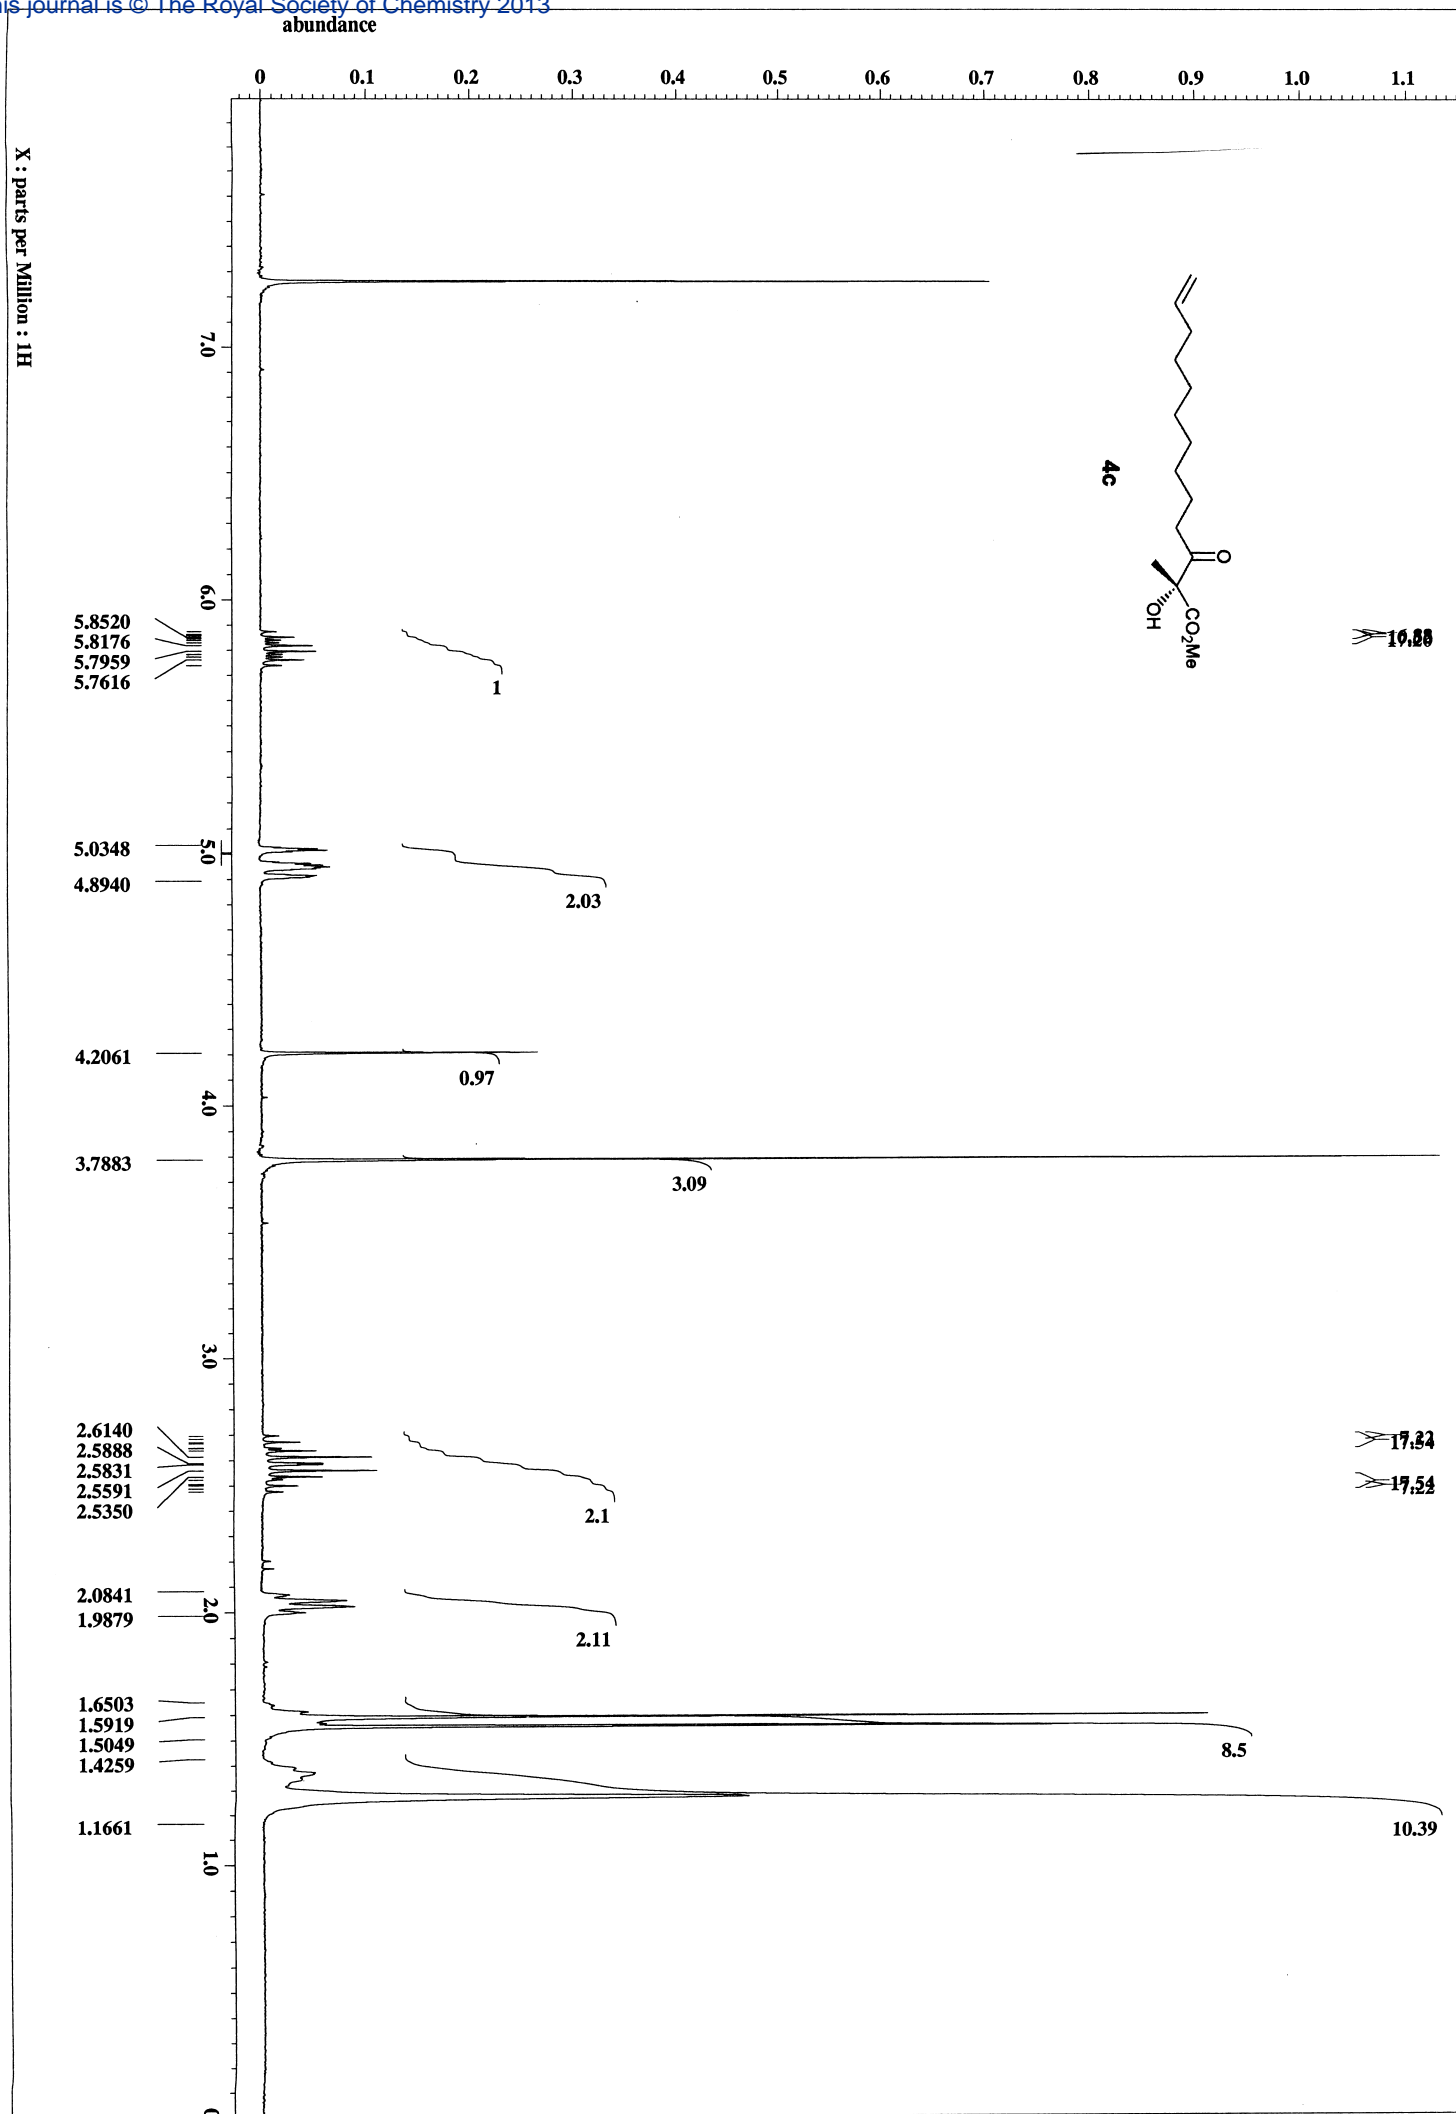

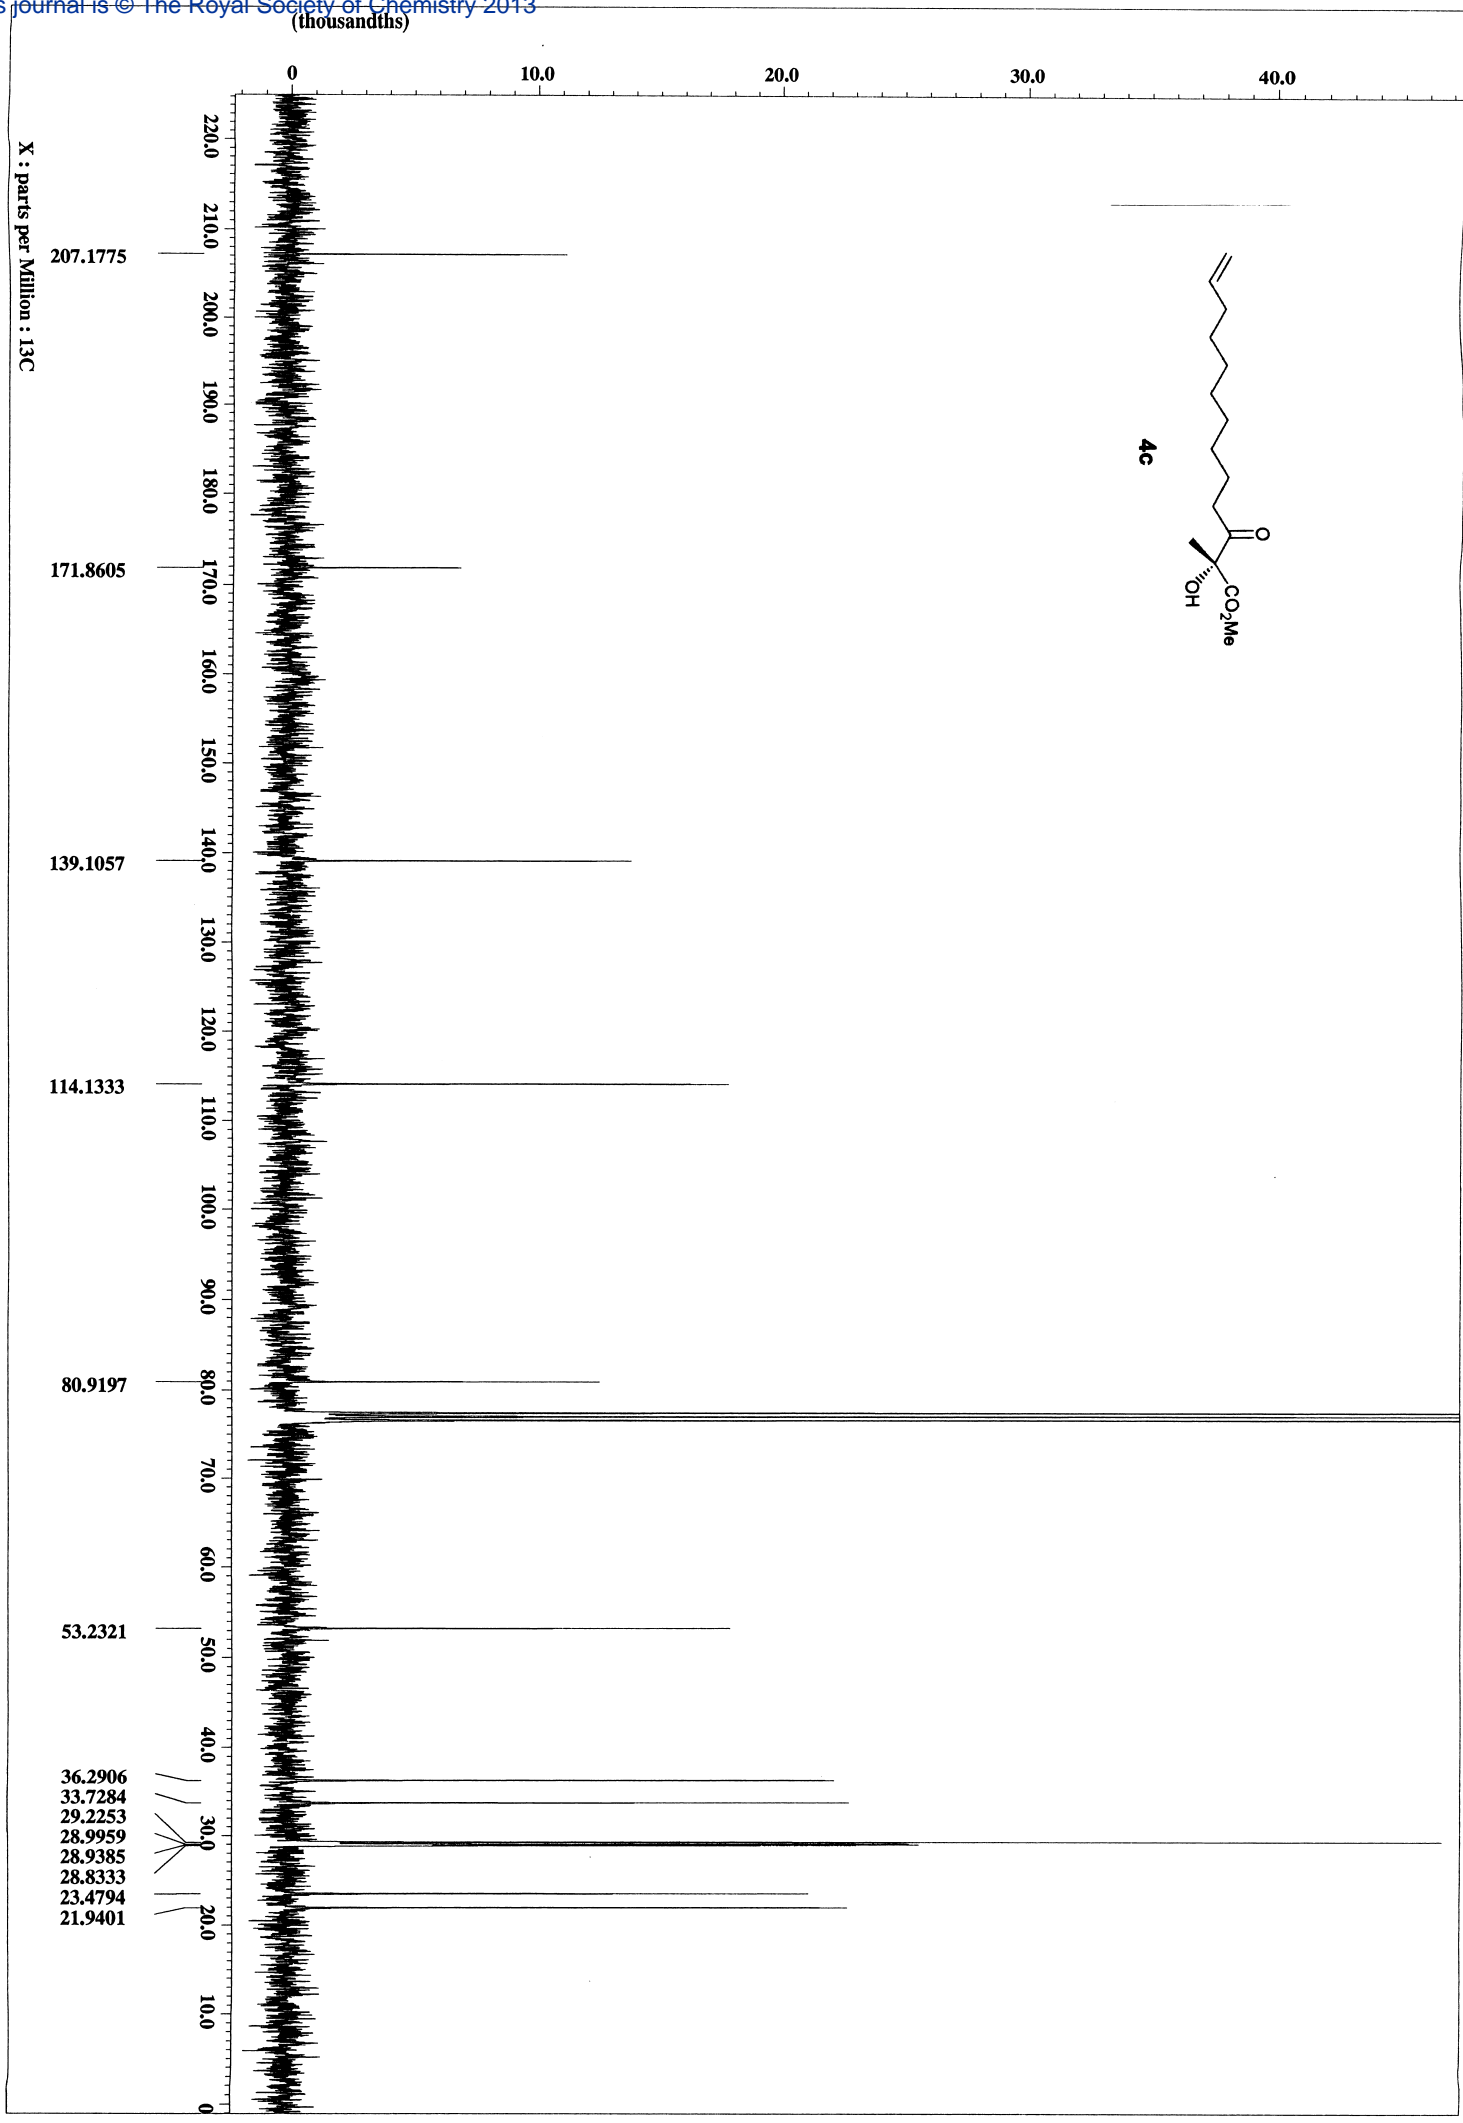

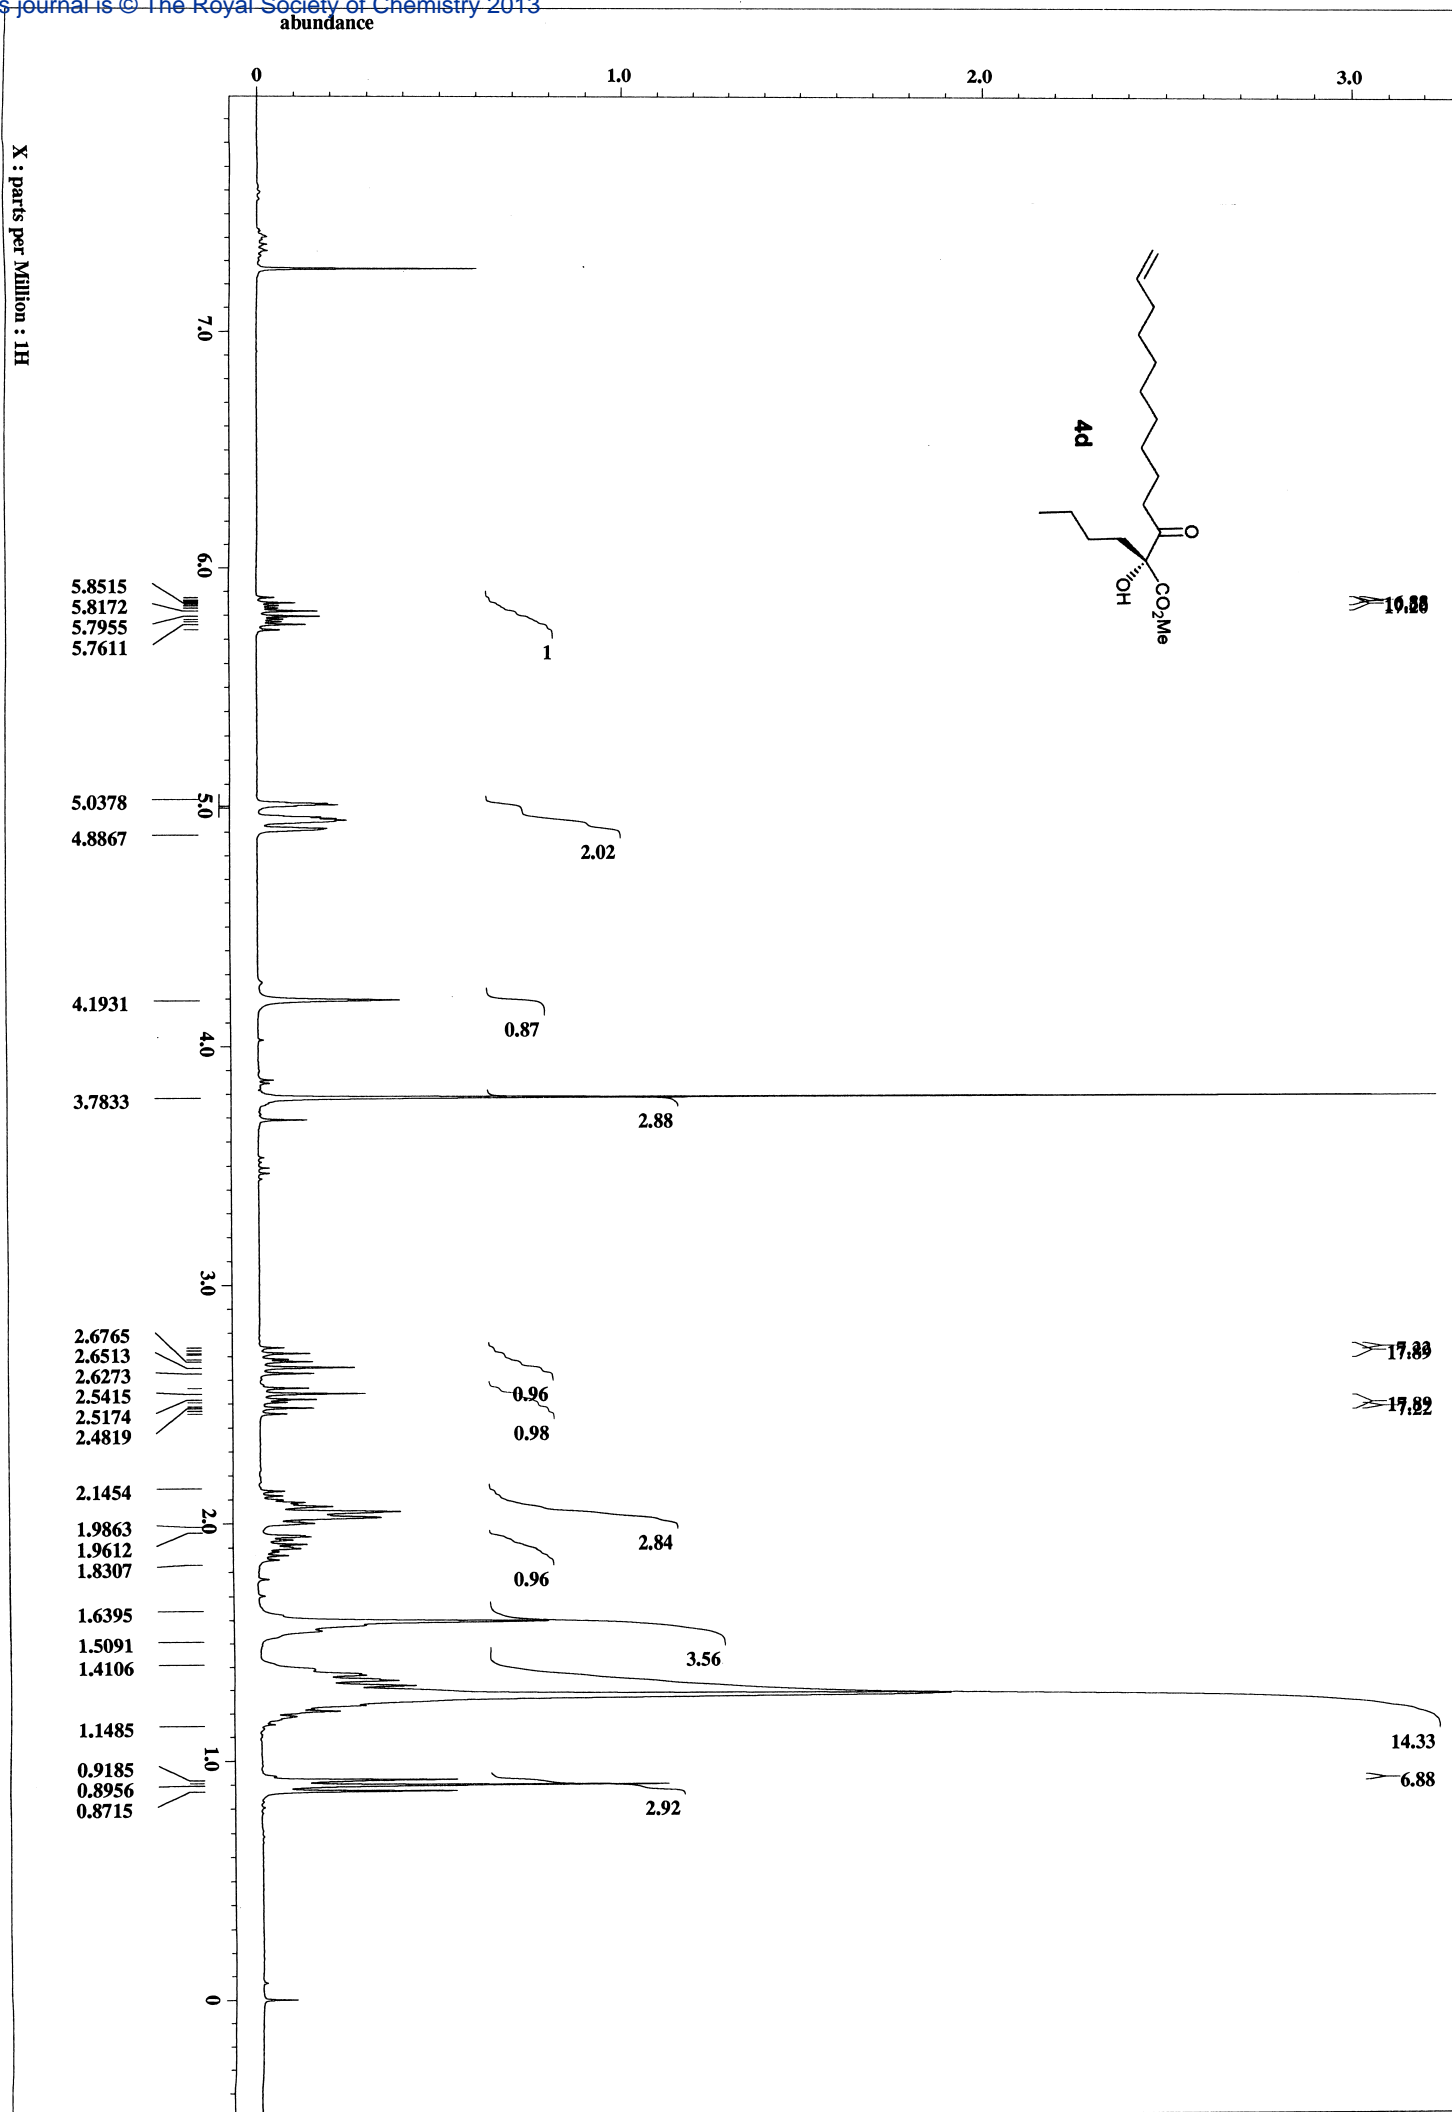

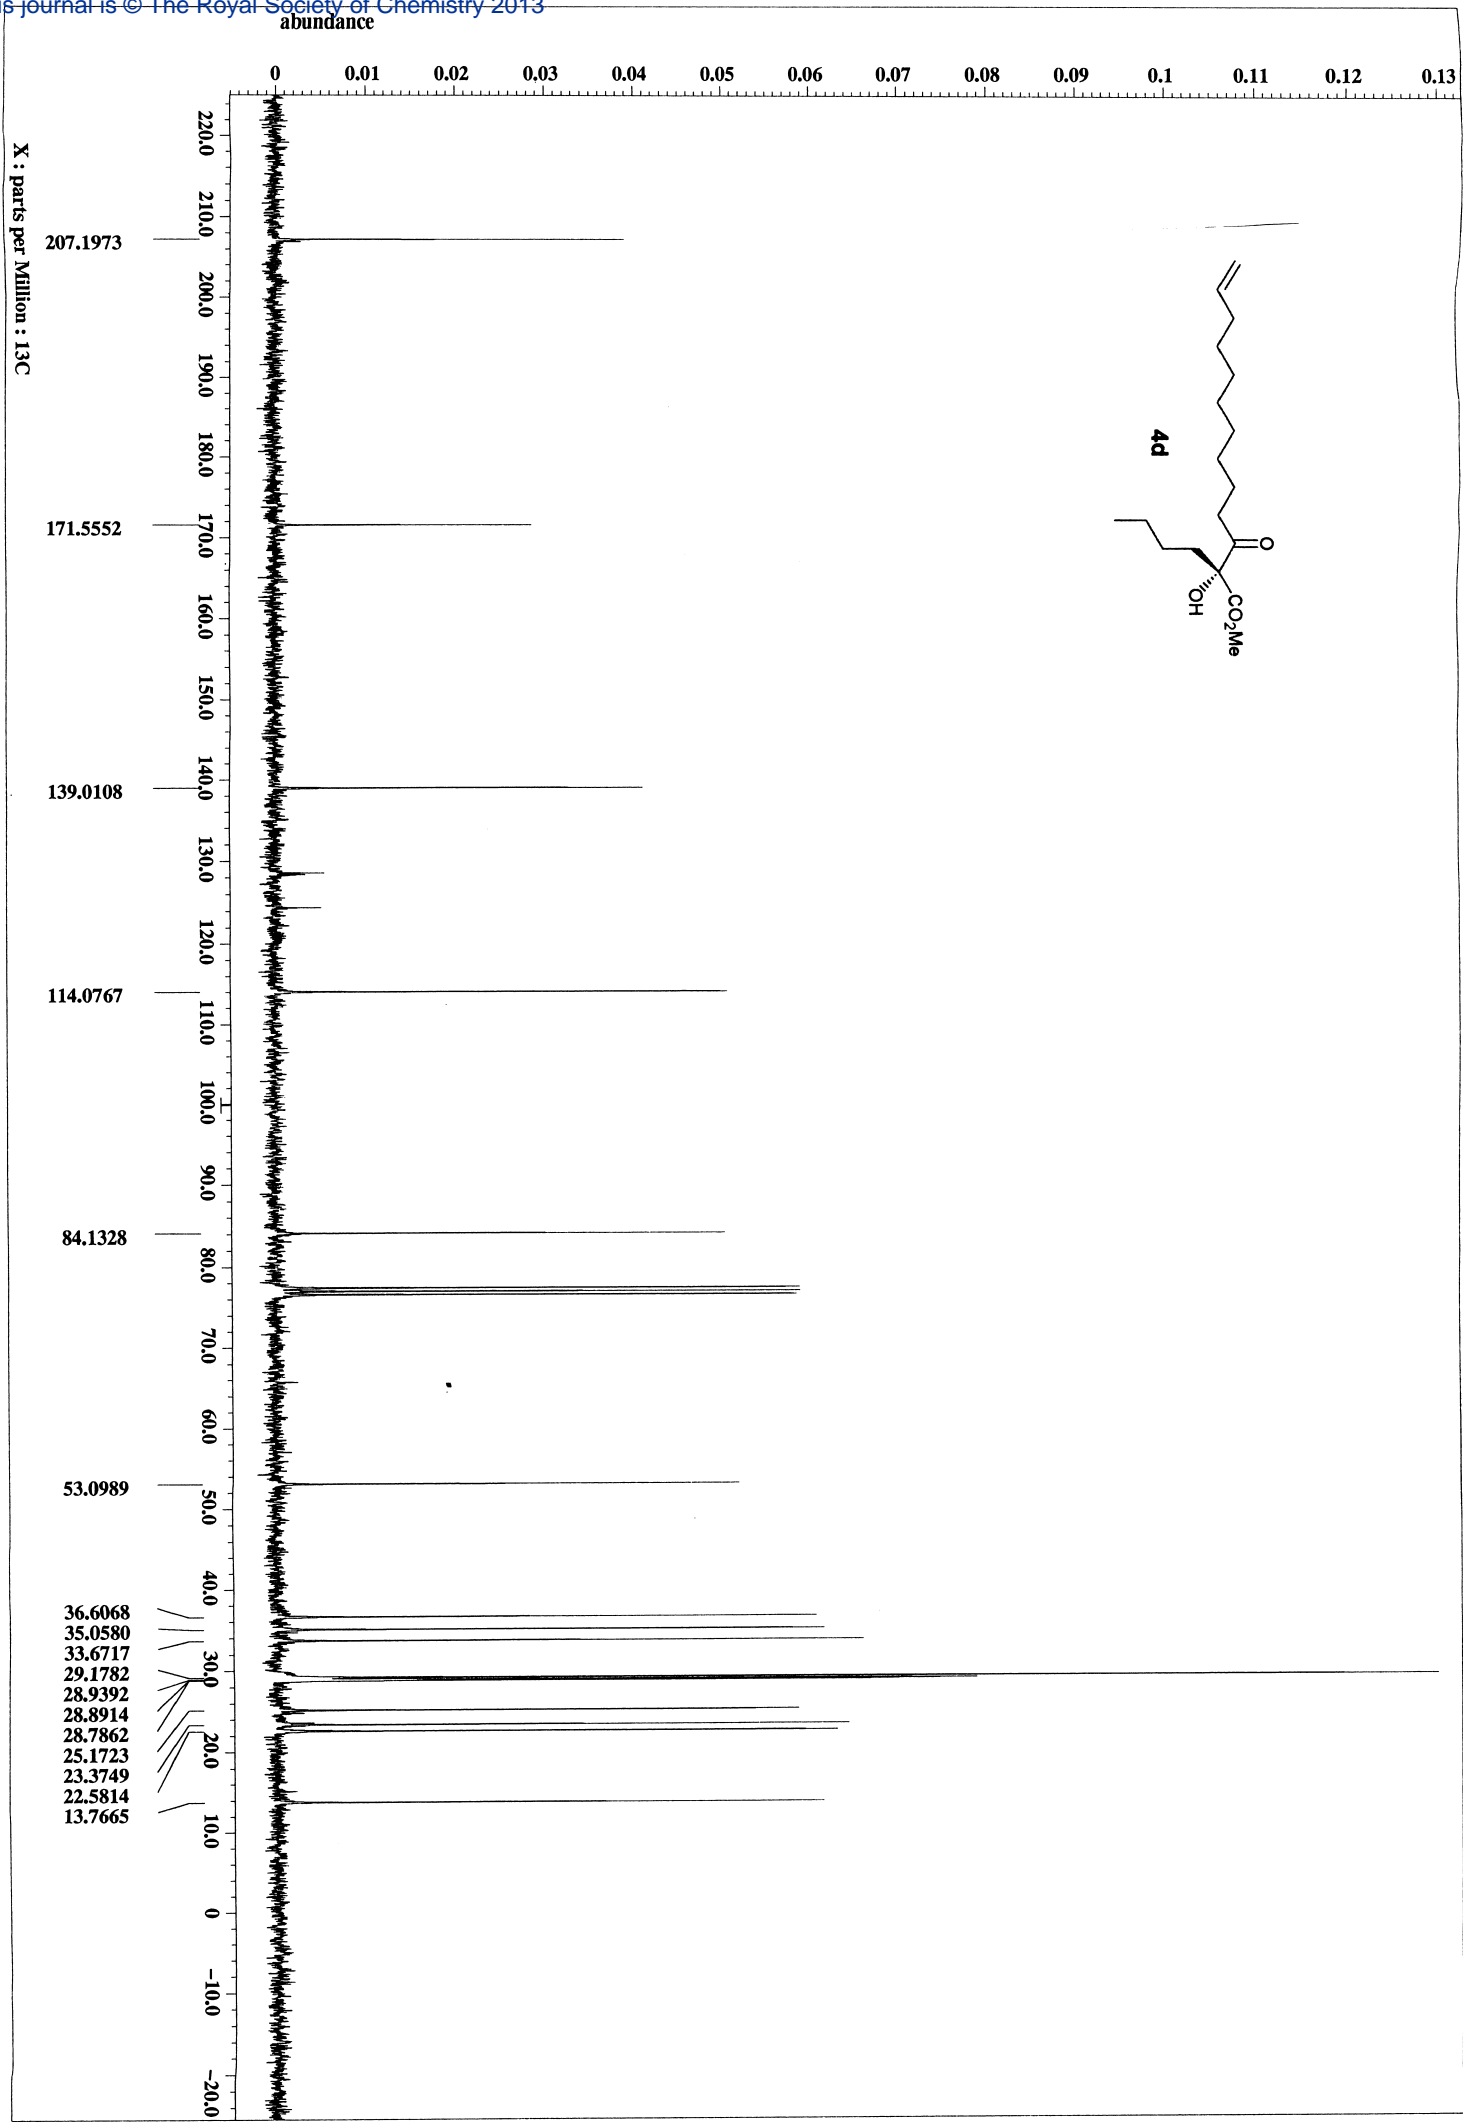

X : parts per Million : 1H

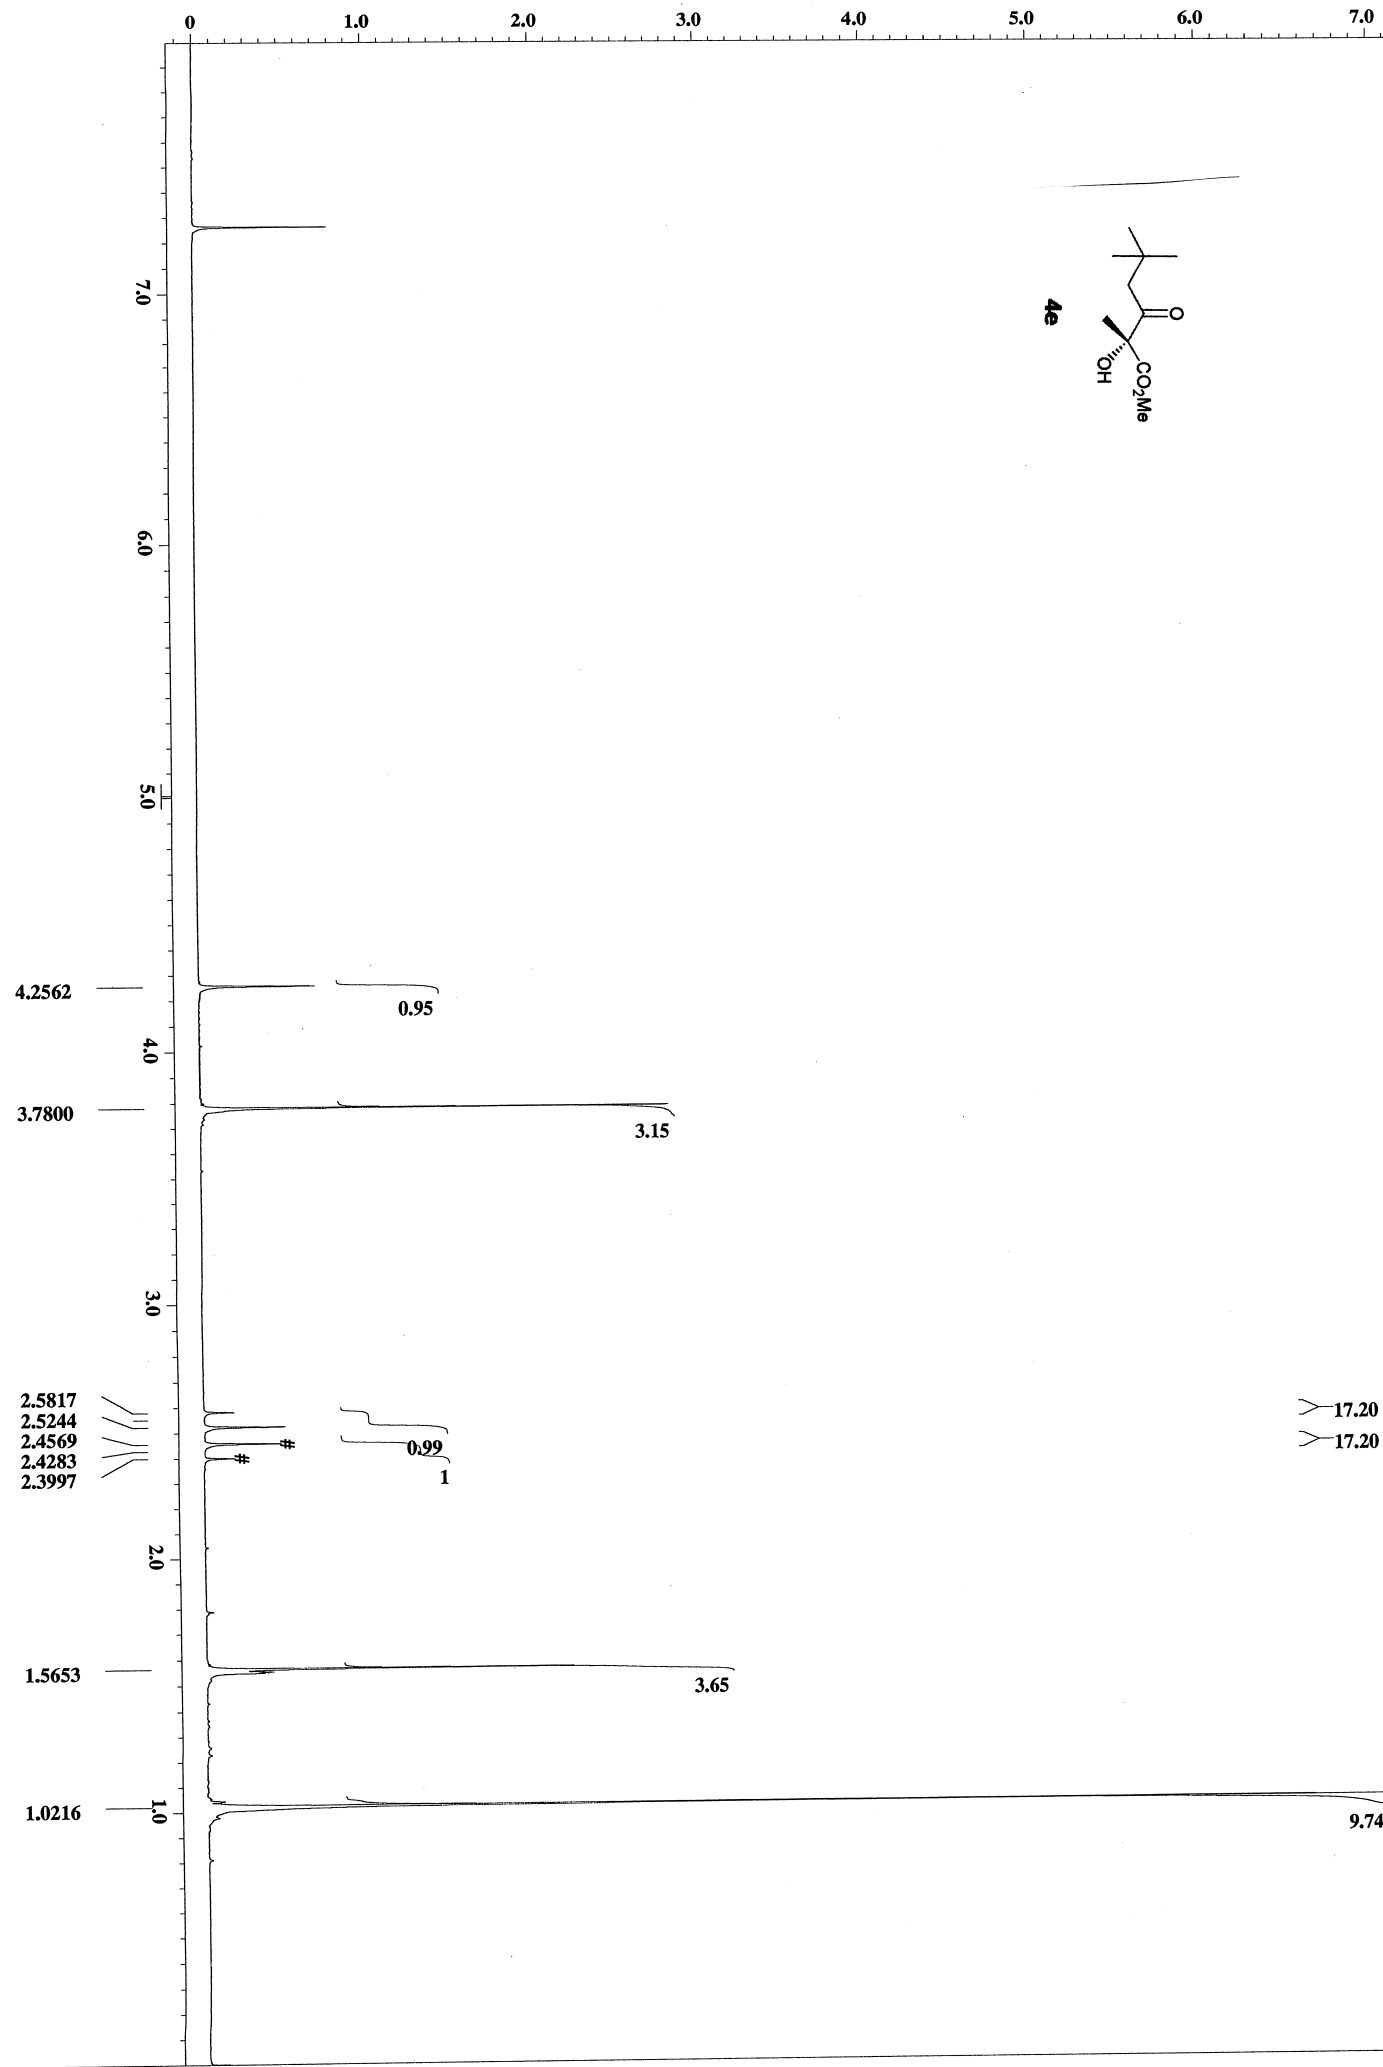

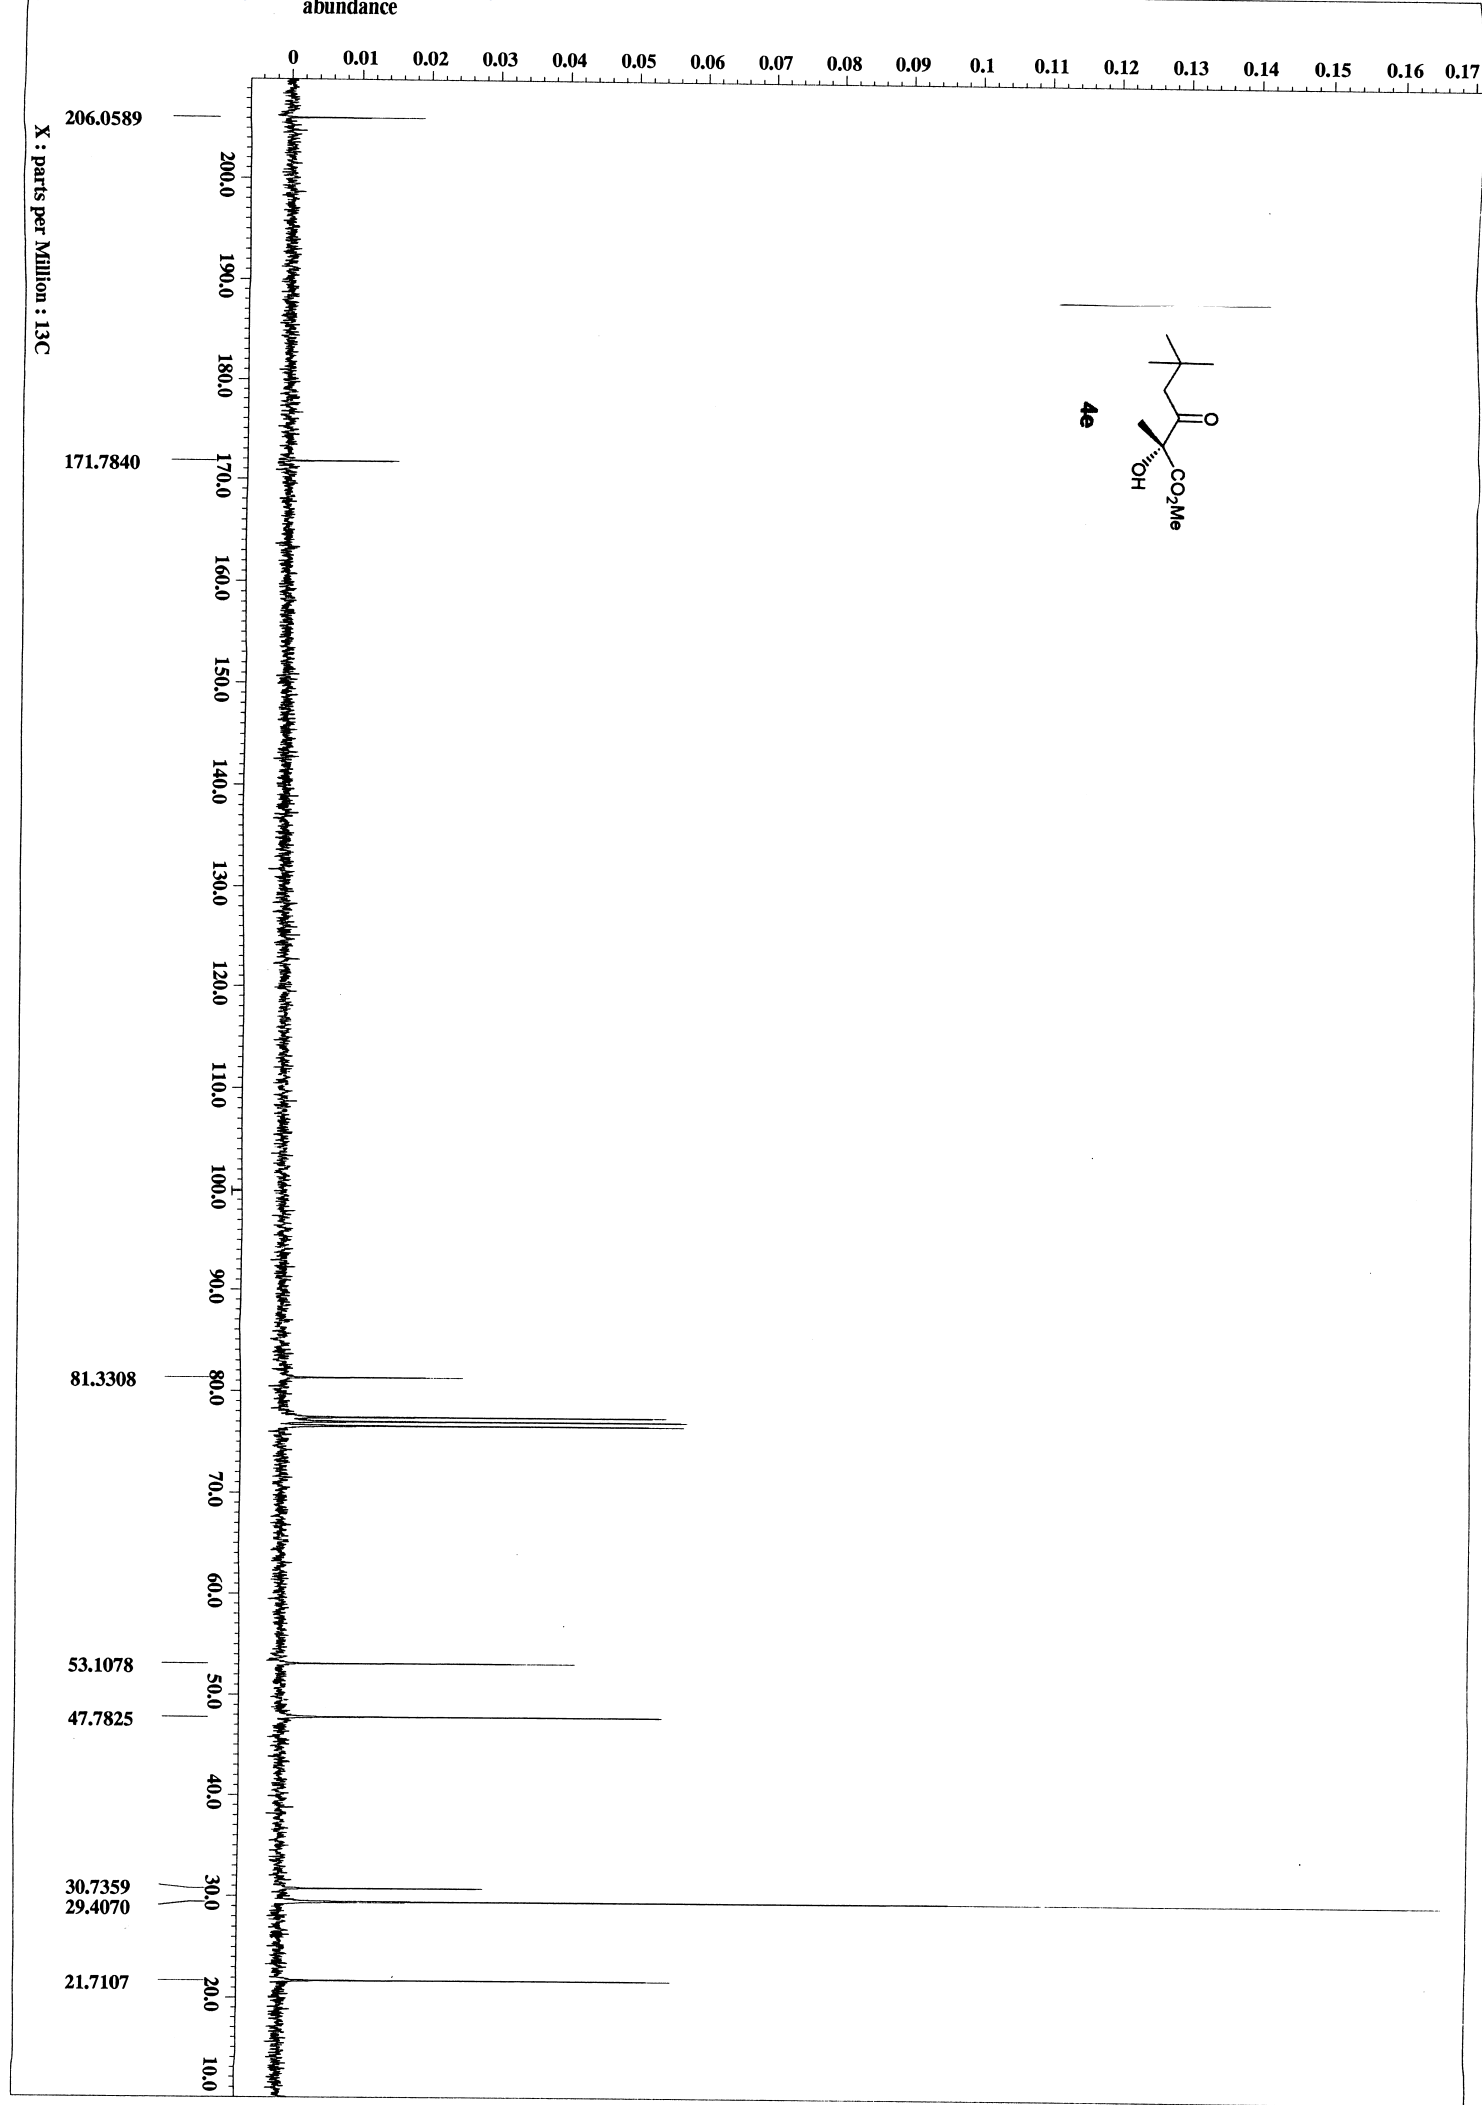

X : parts per Million : 1H

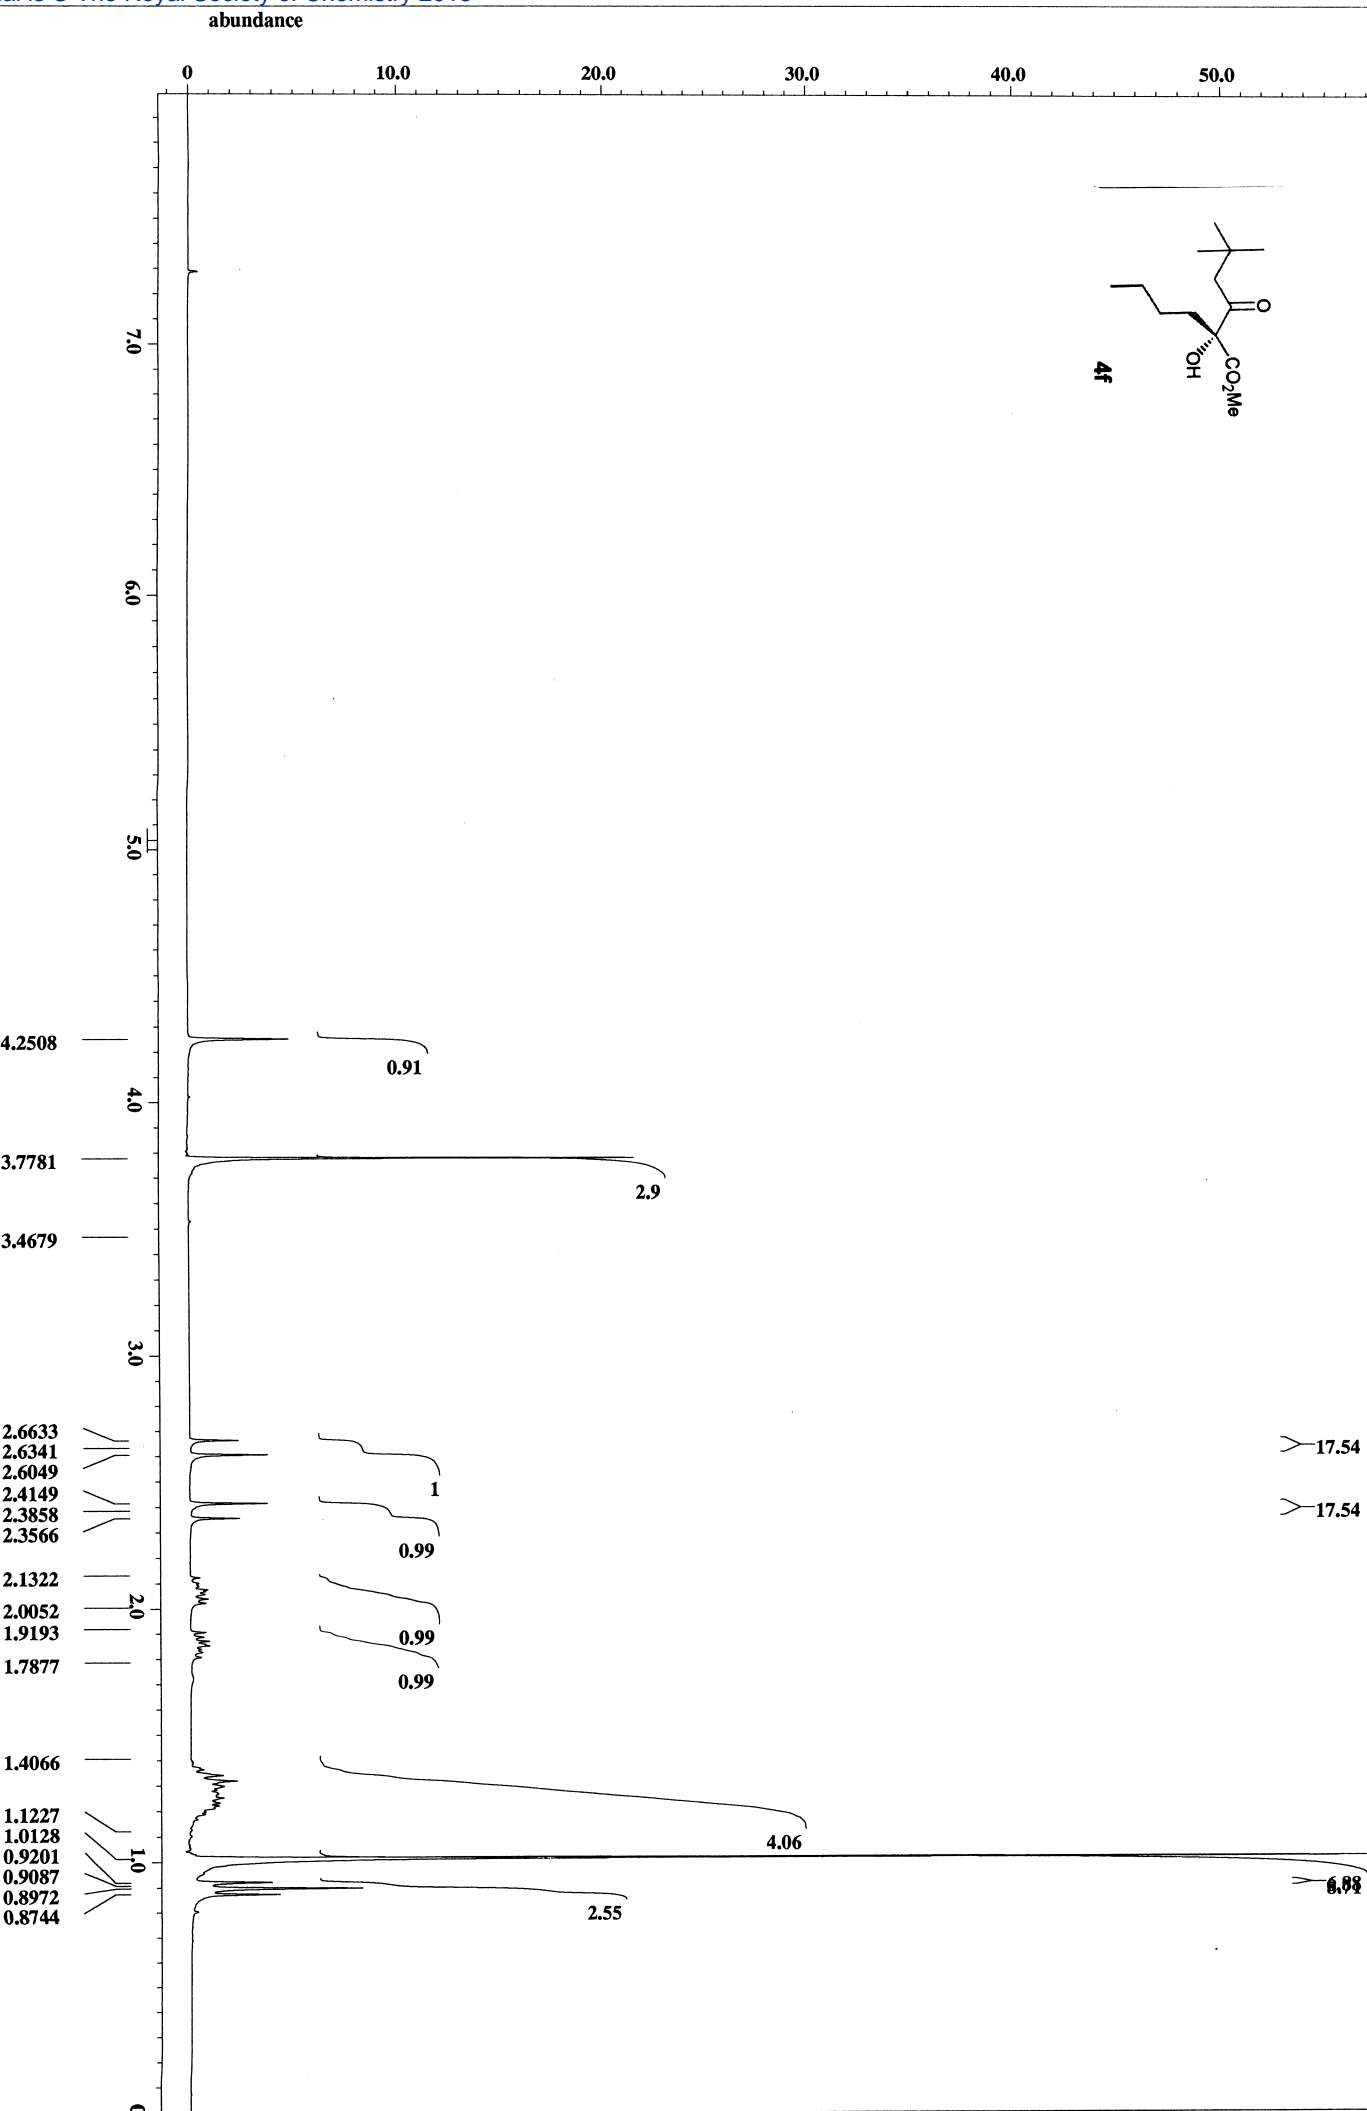

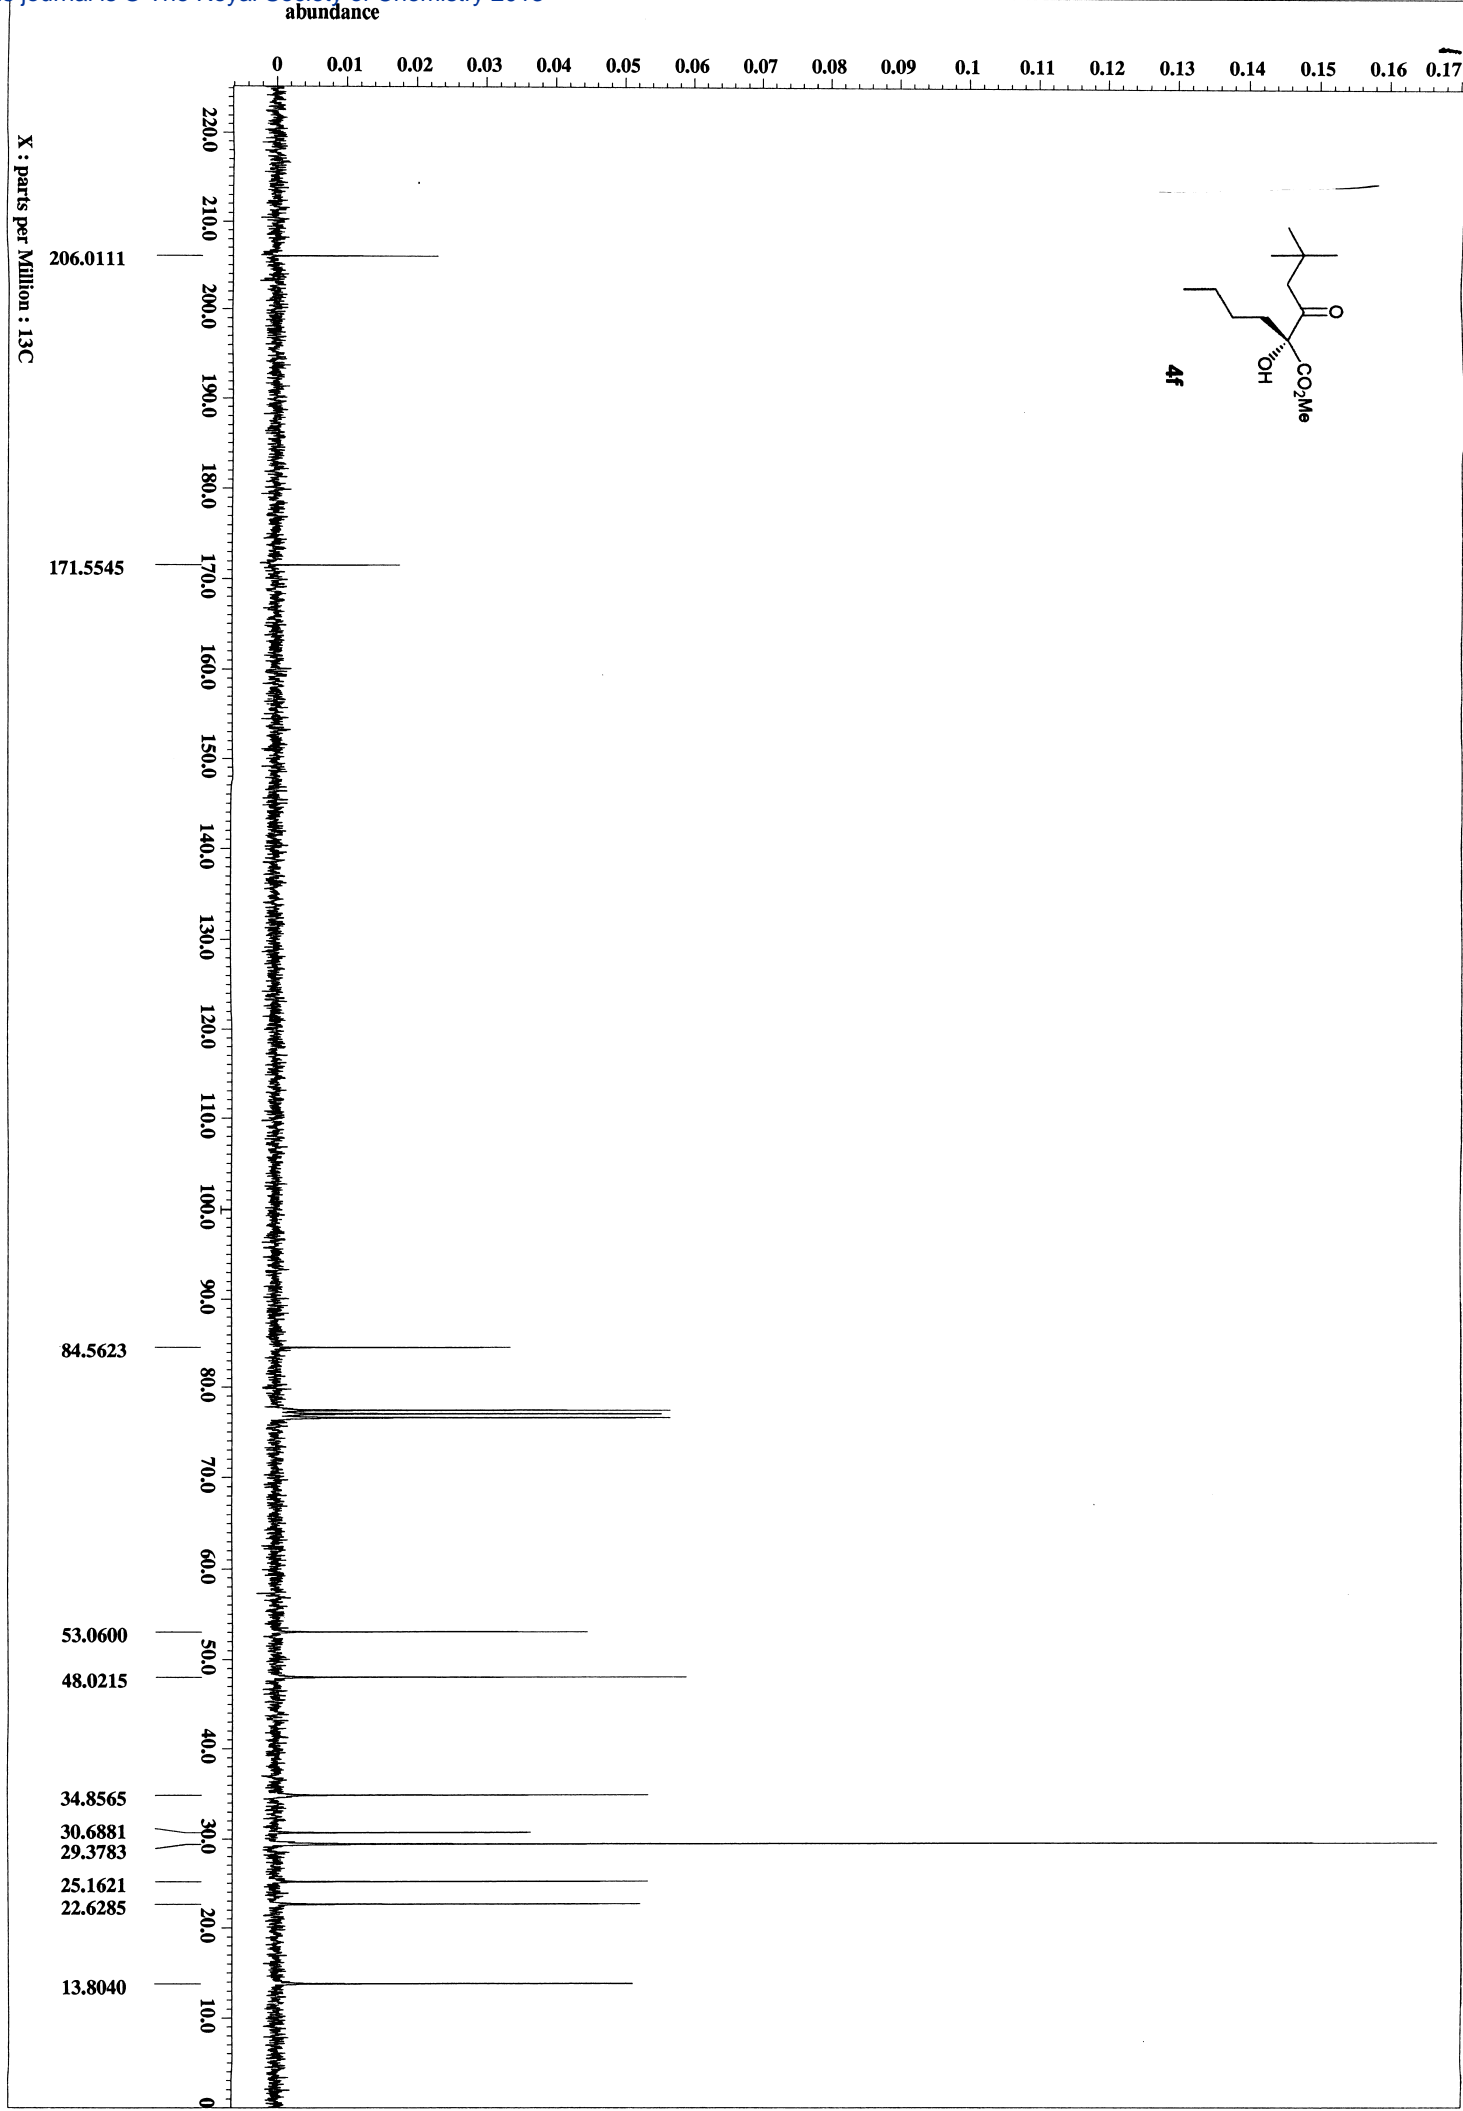



X : parts per Million : 1H

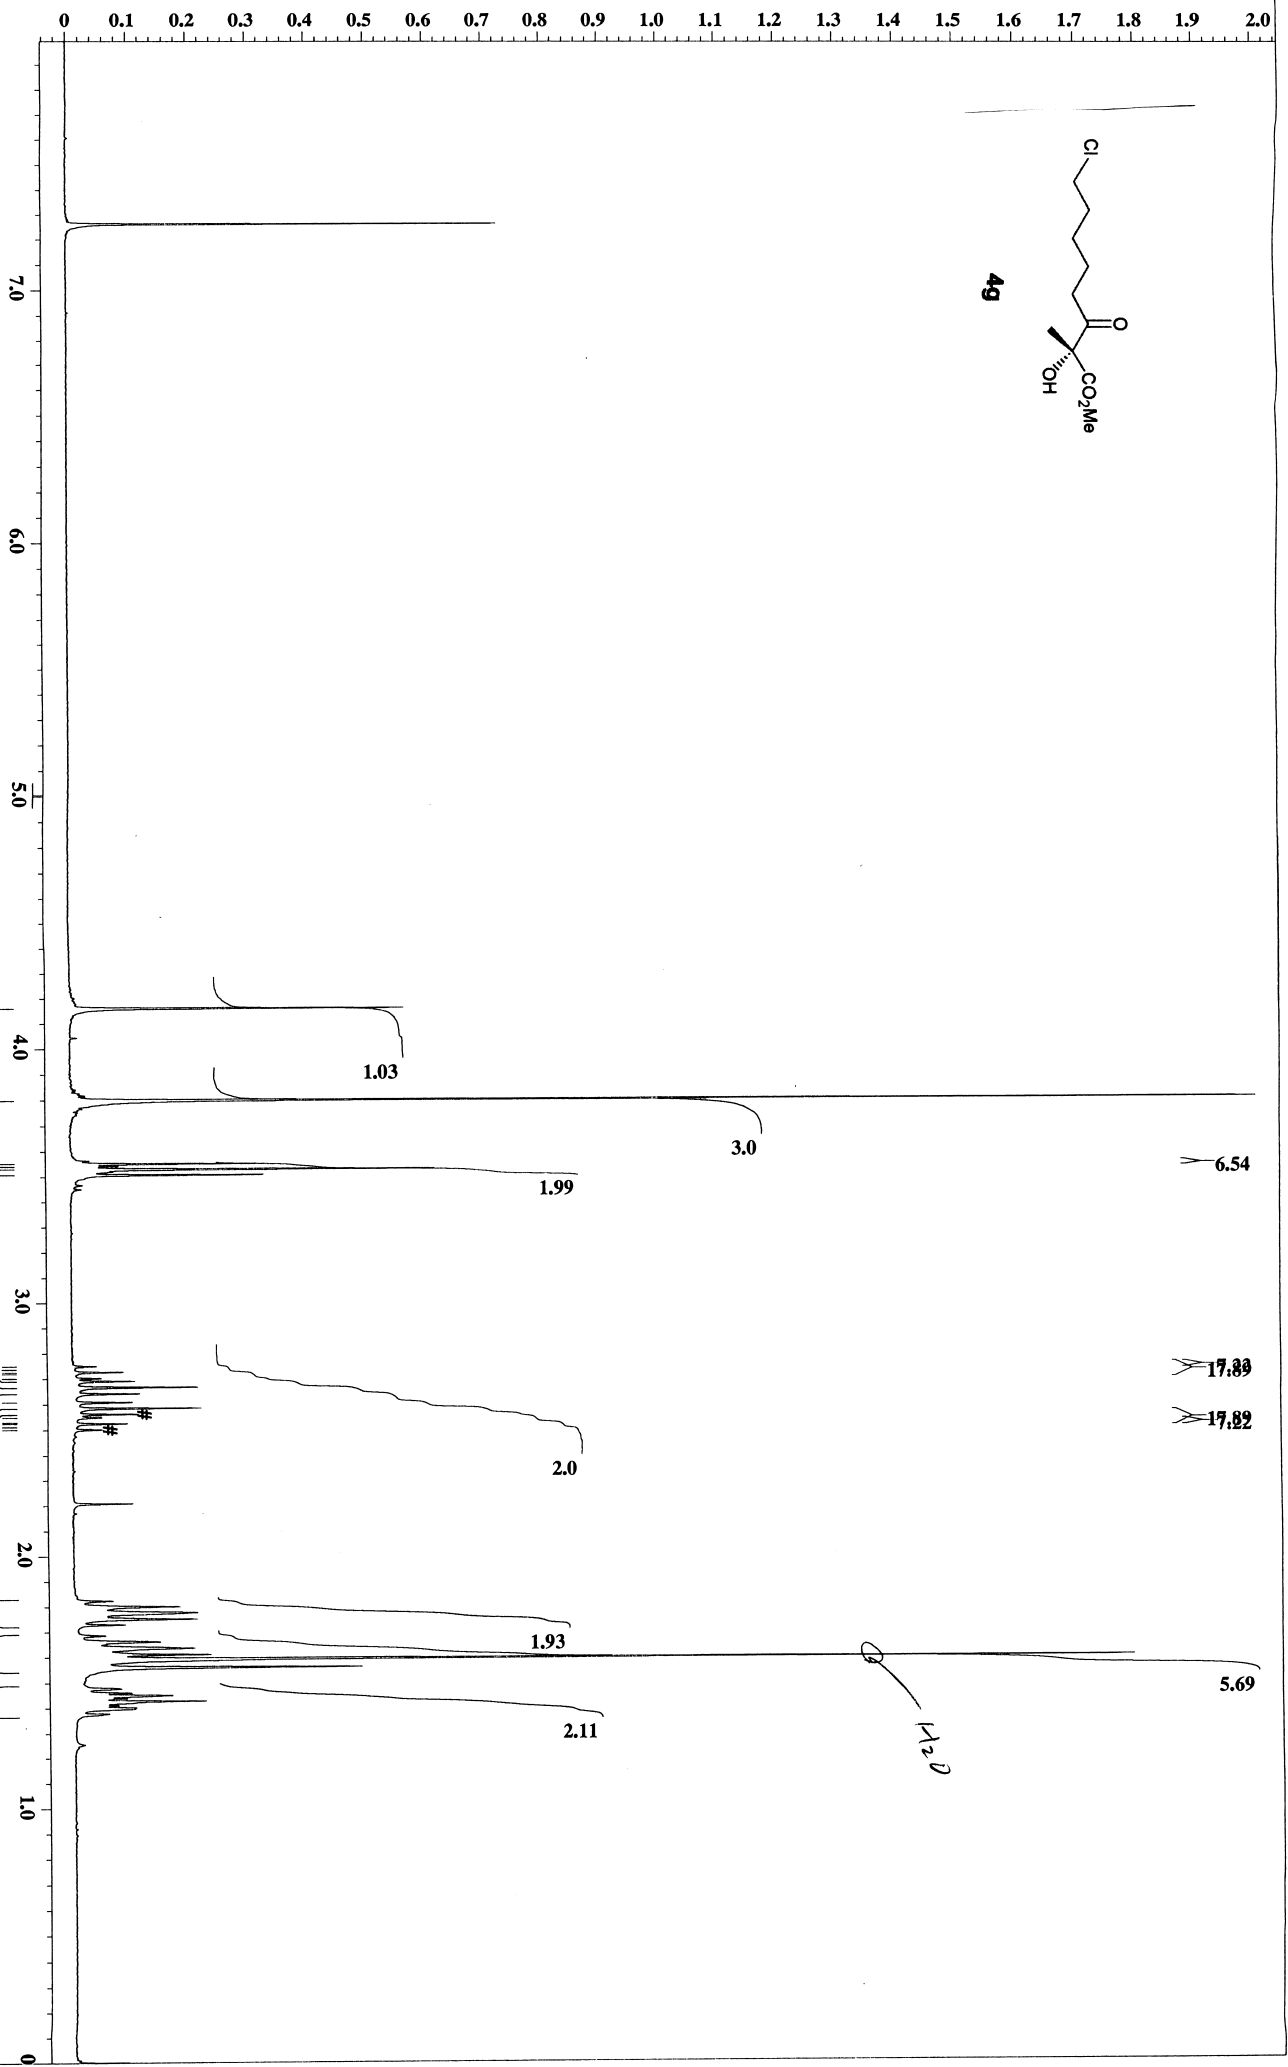

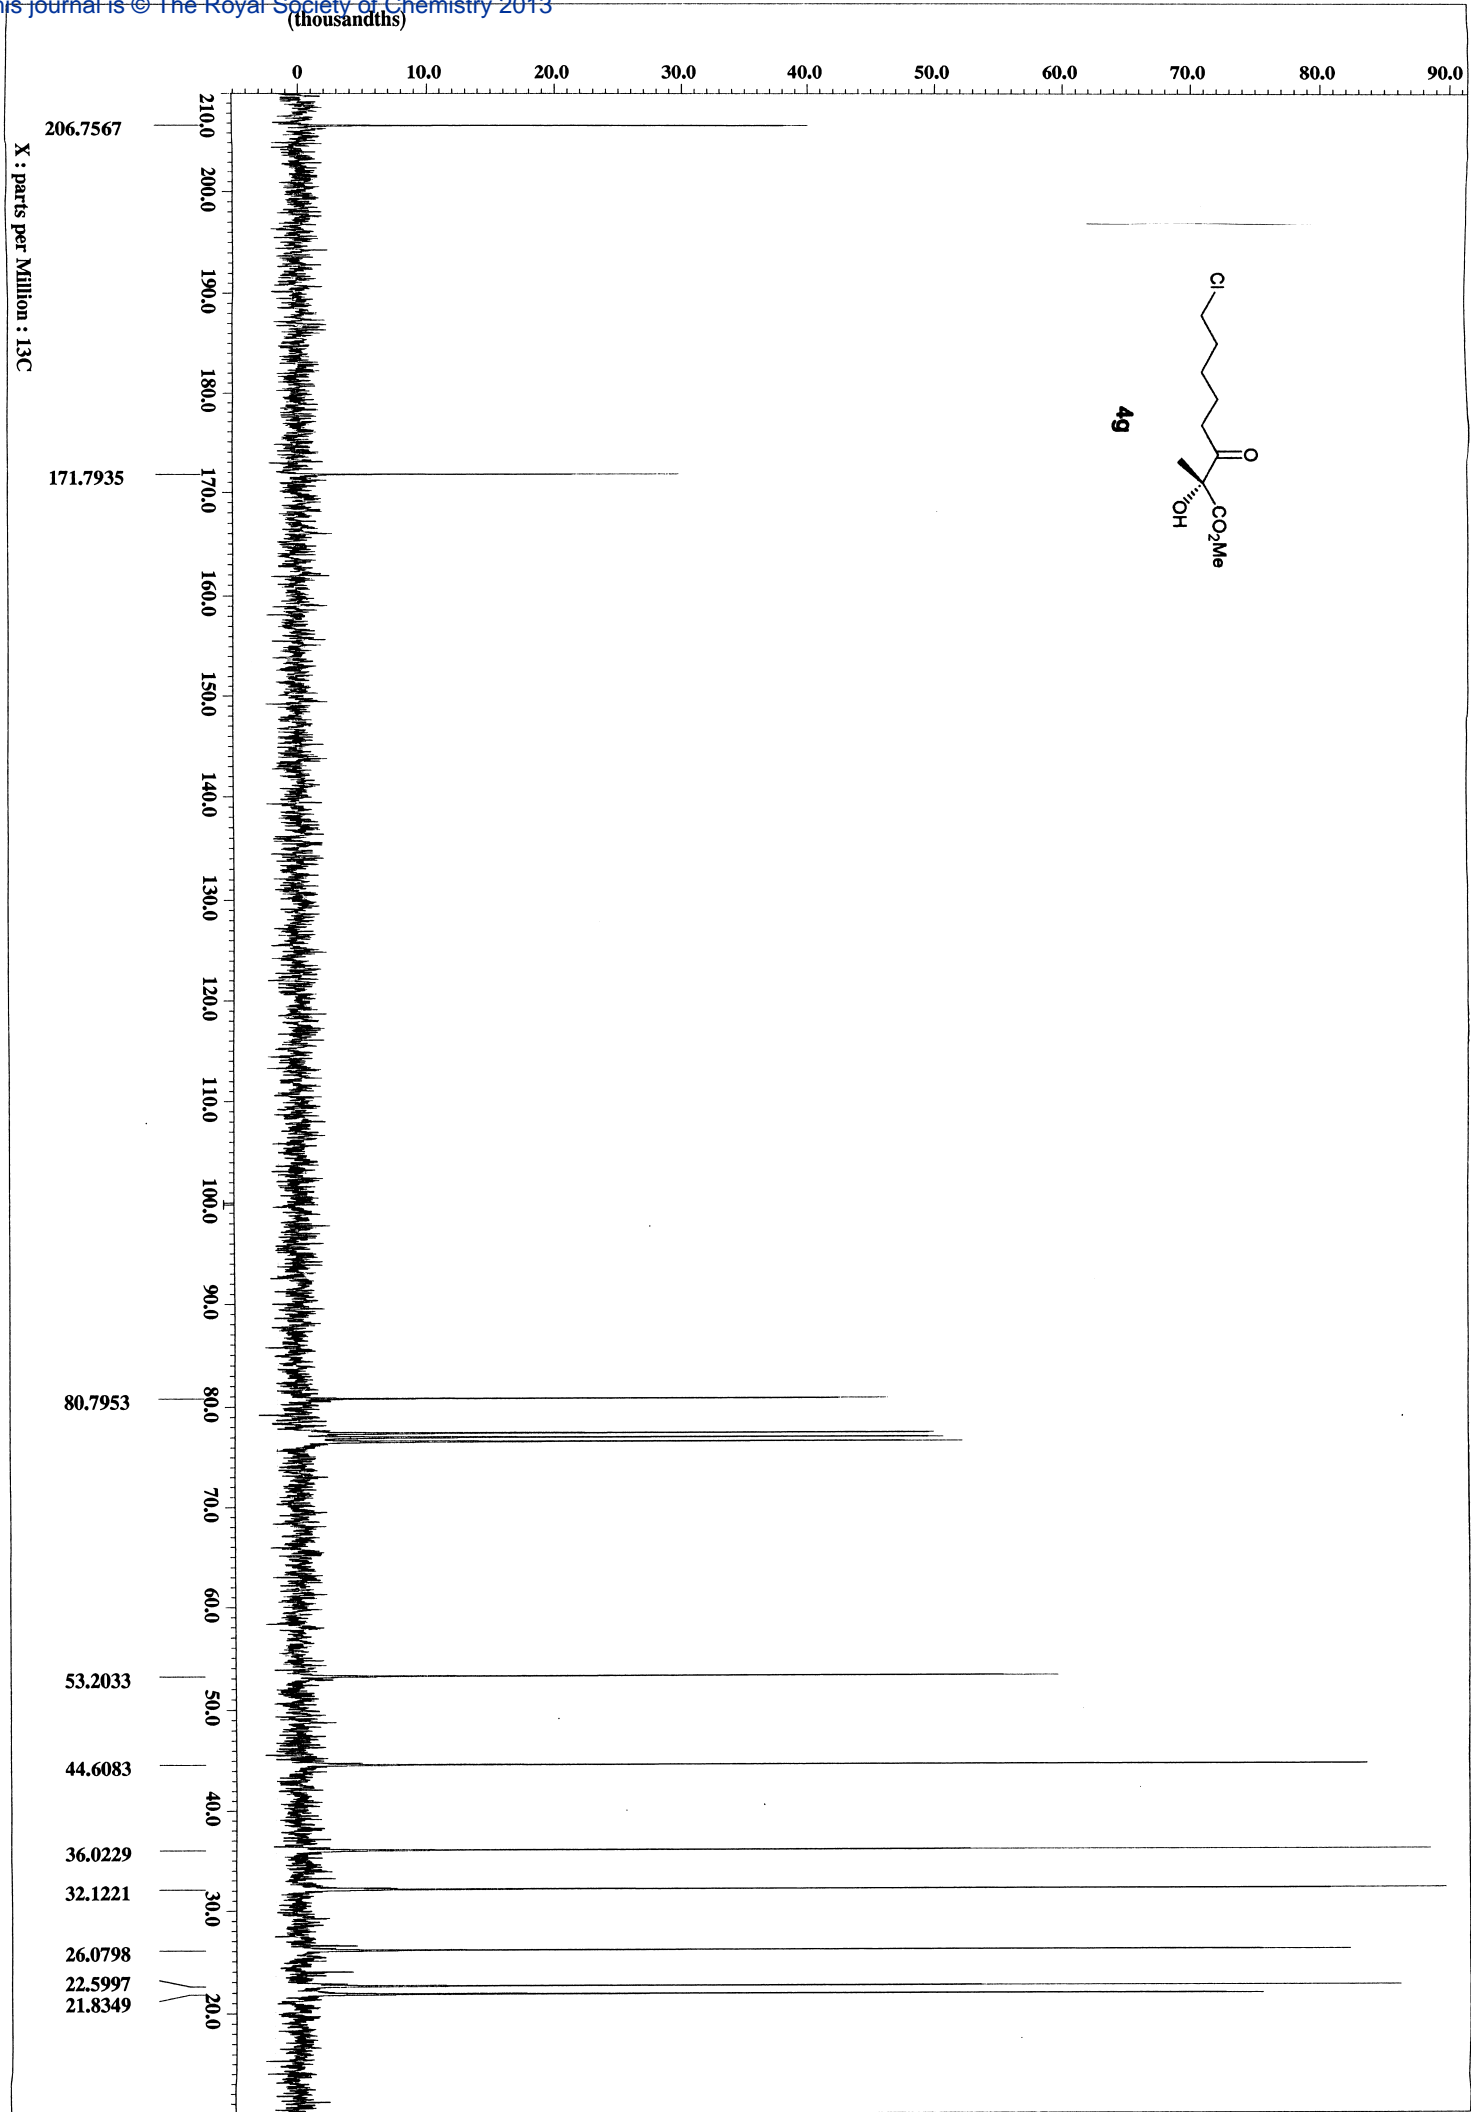

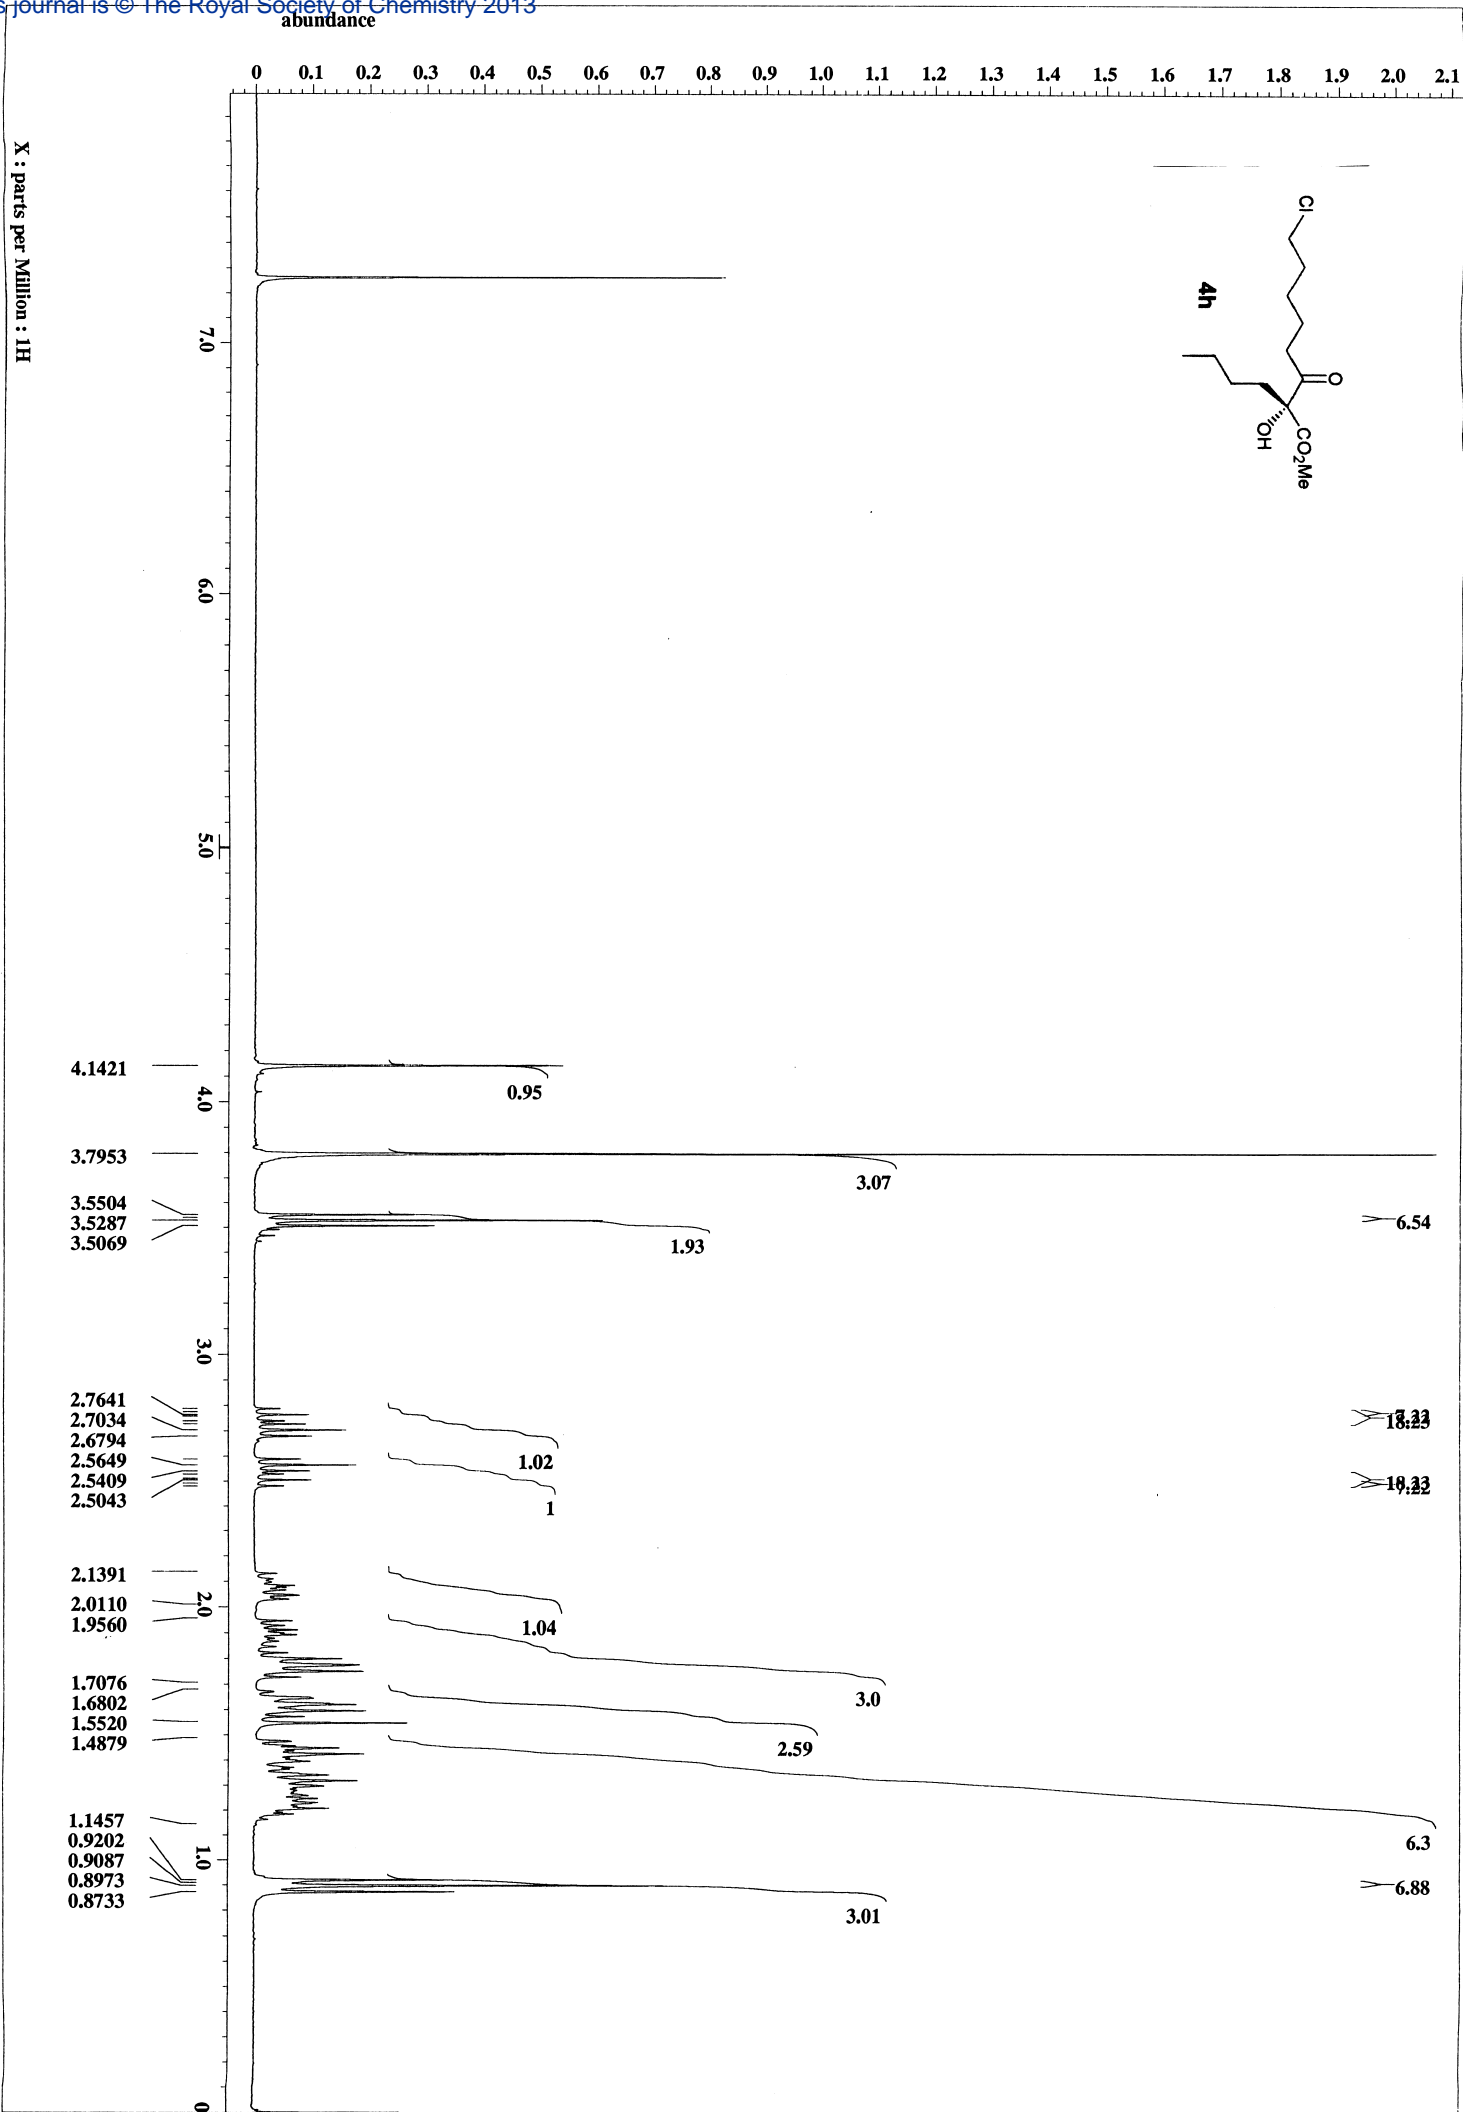

(thousandths)

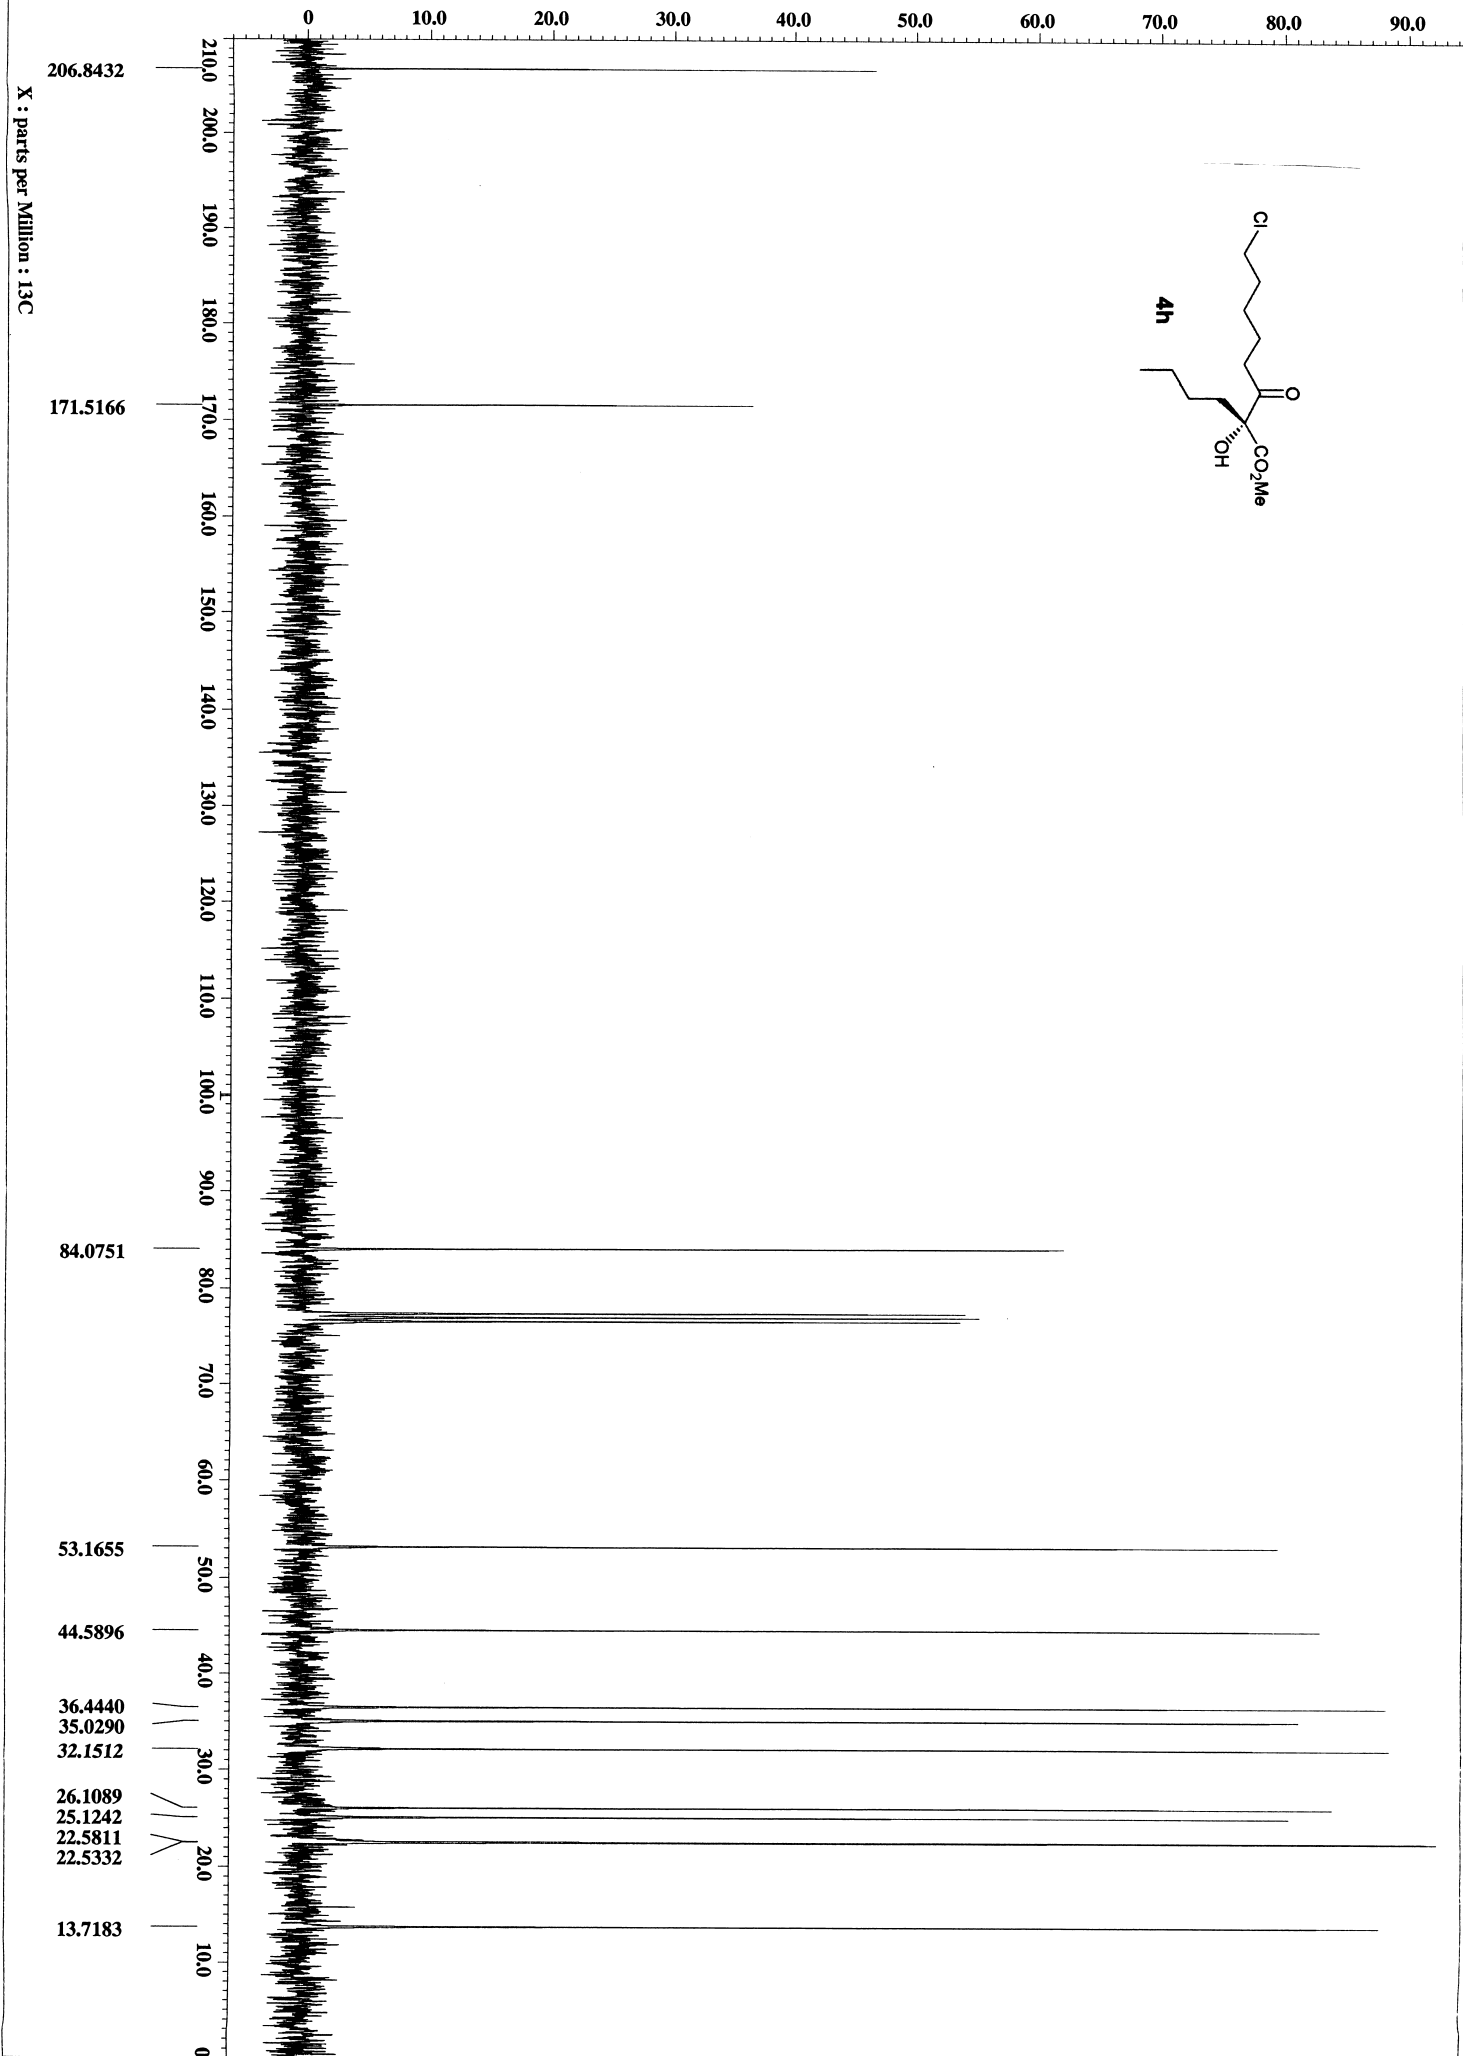

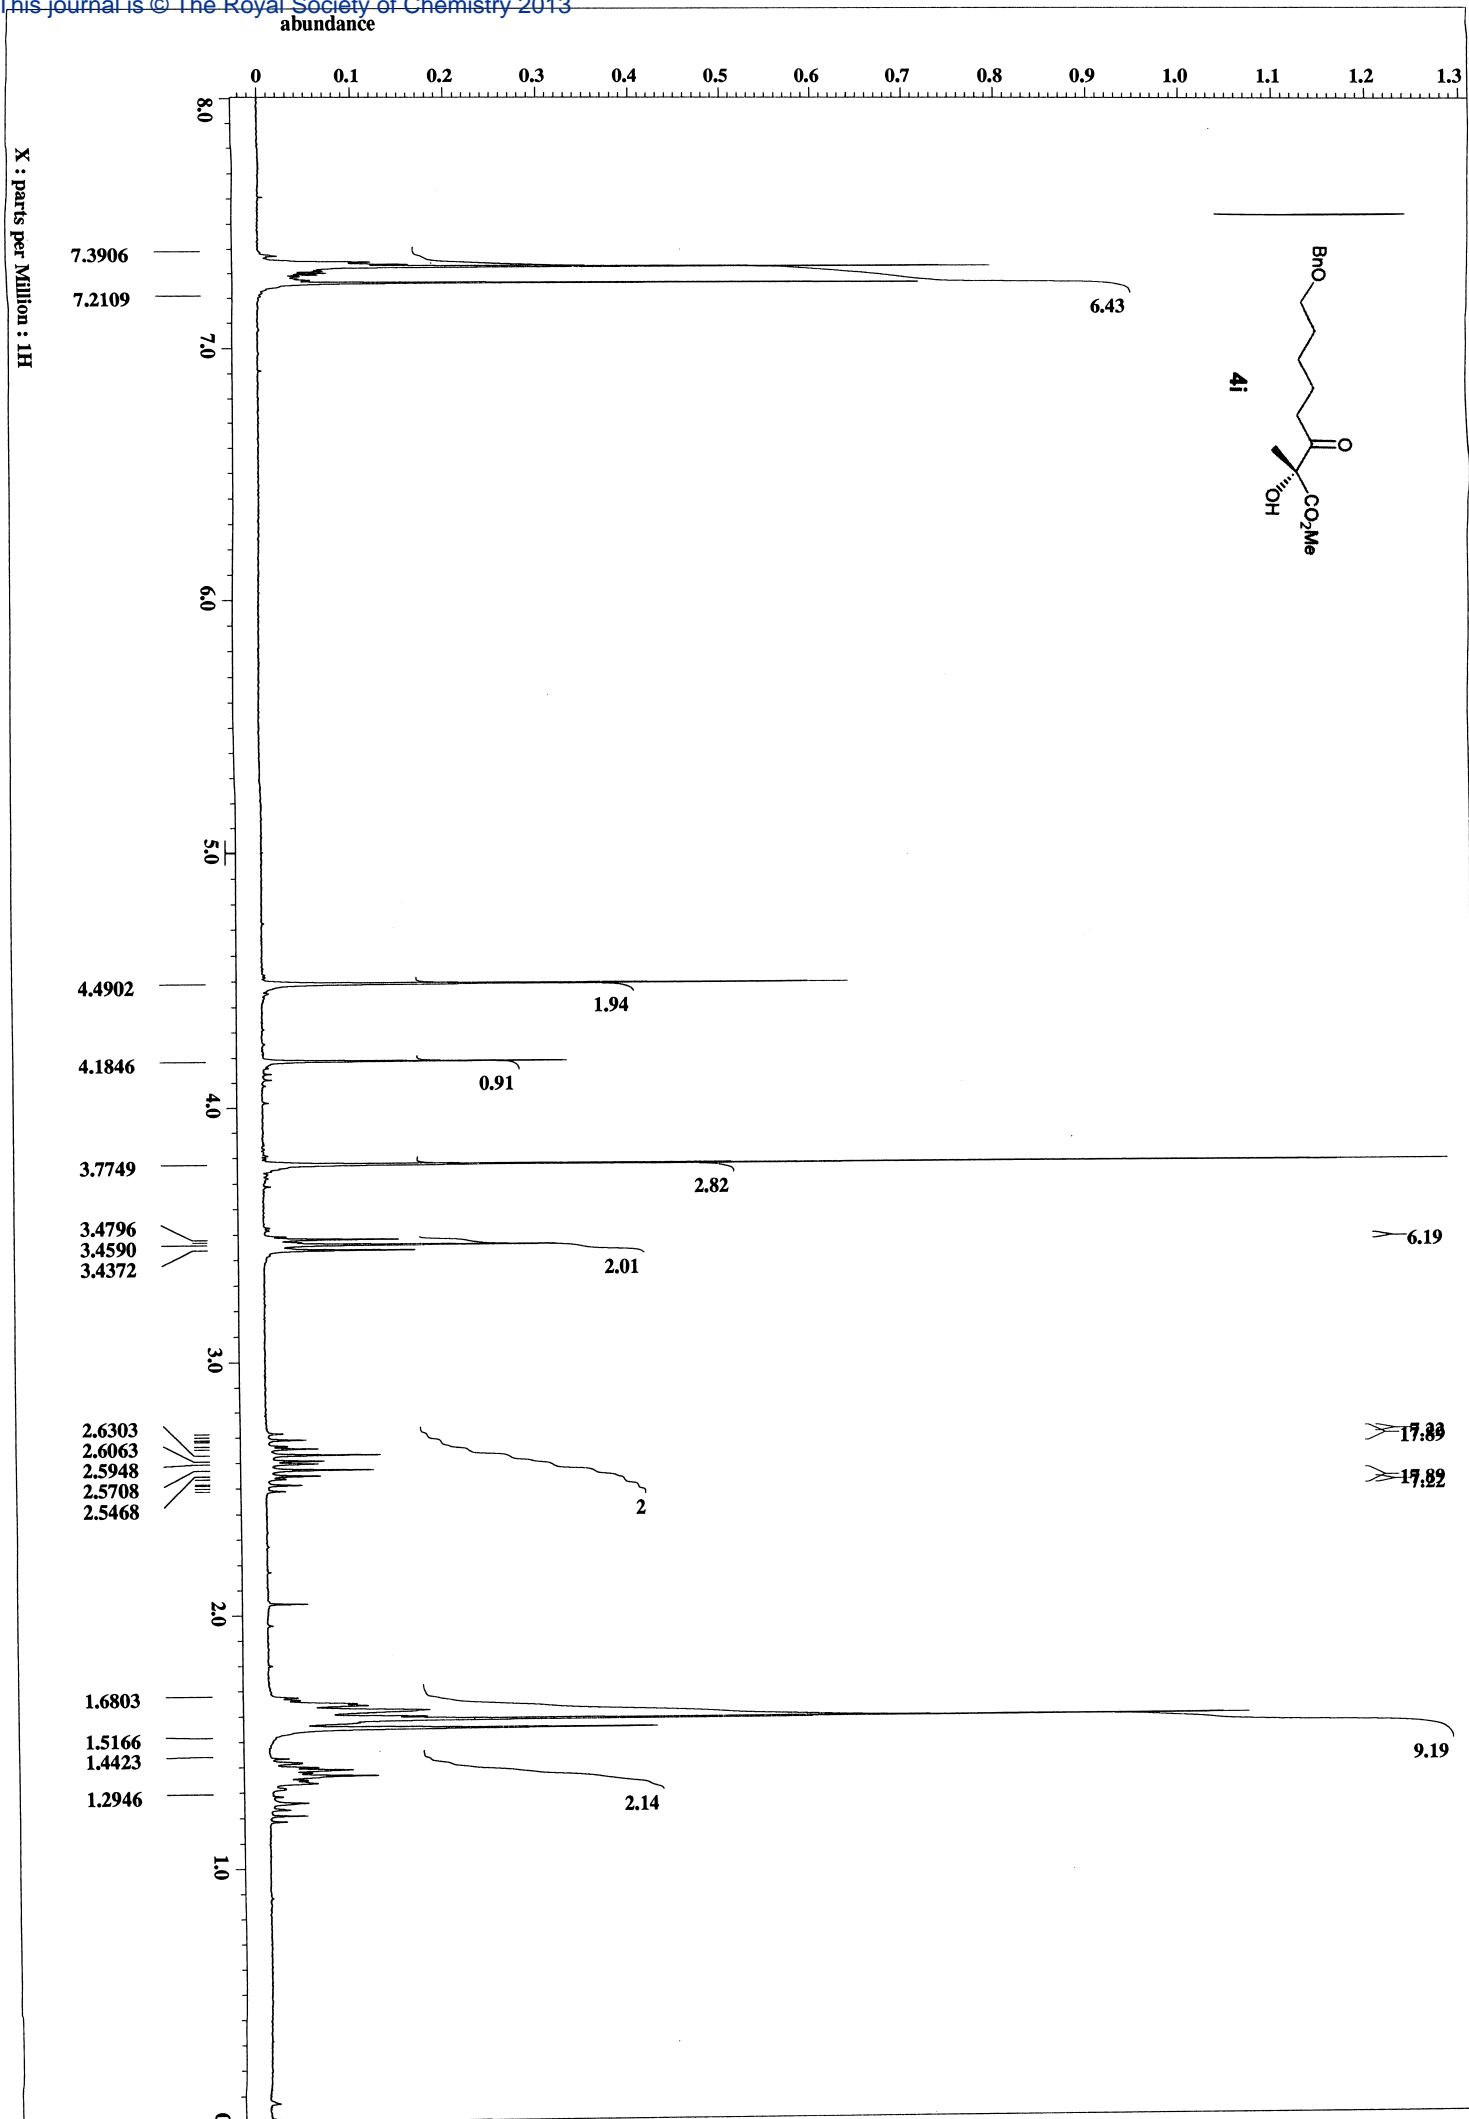

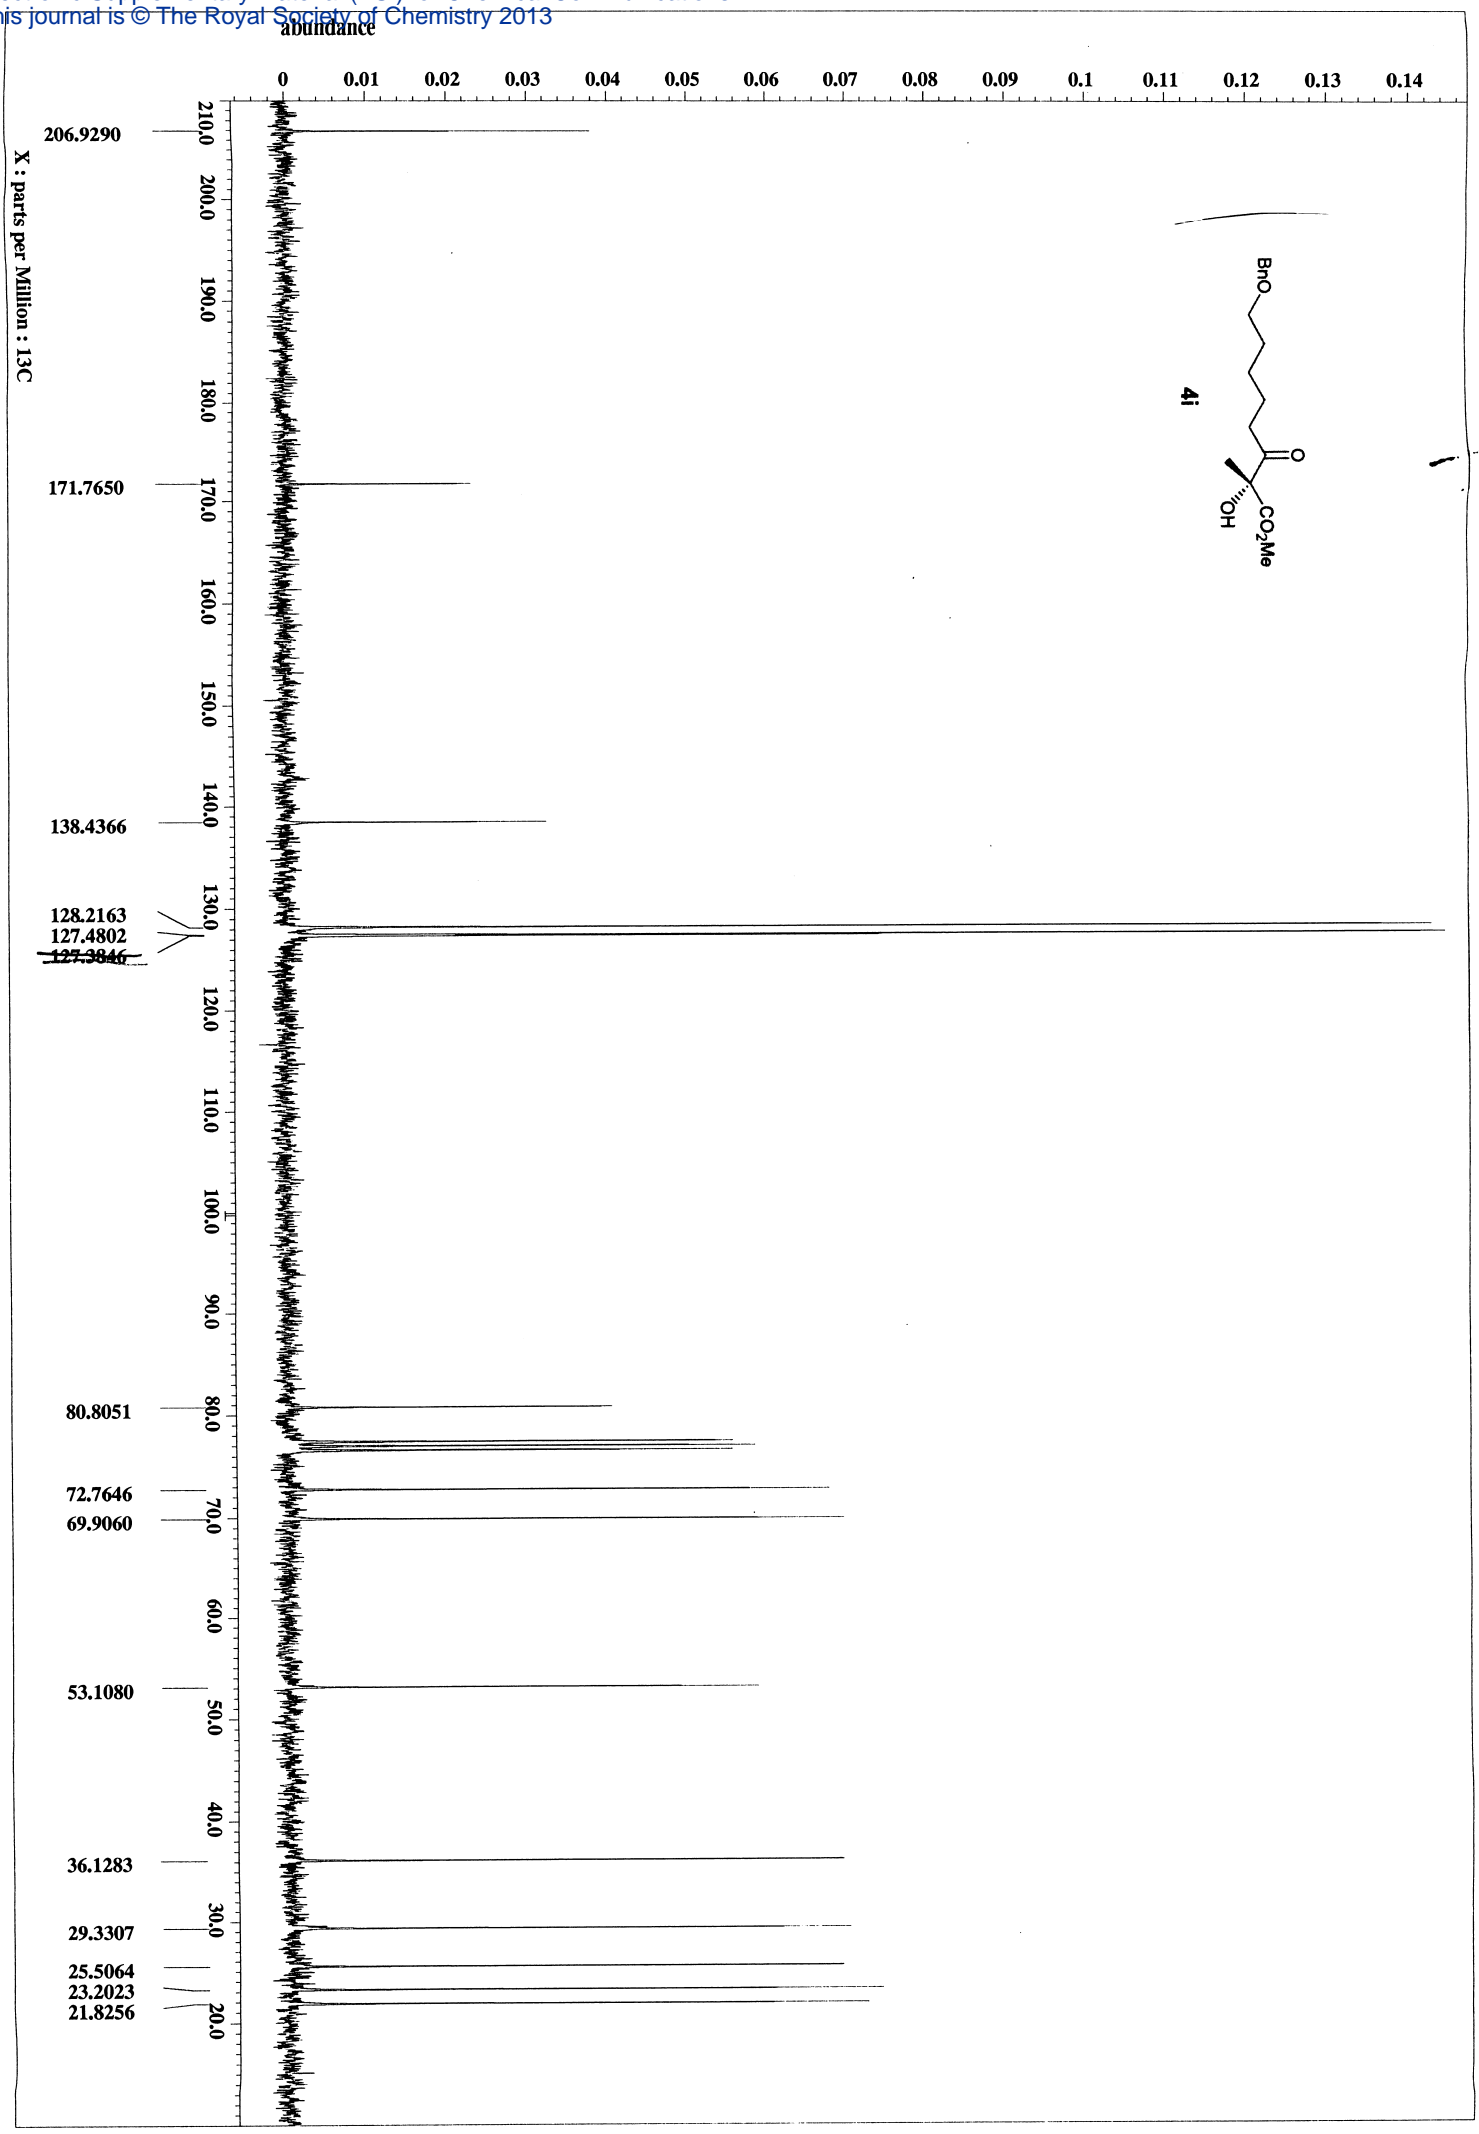

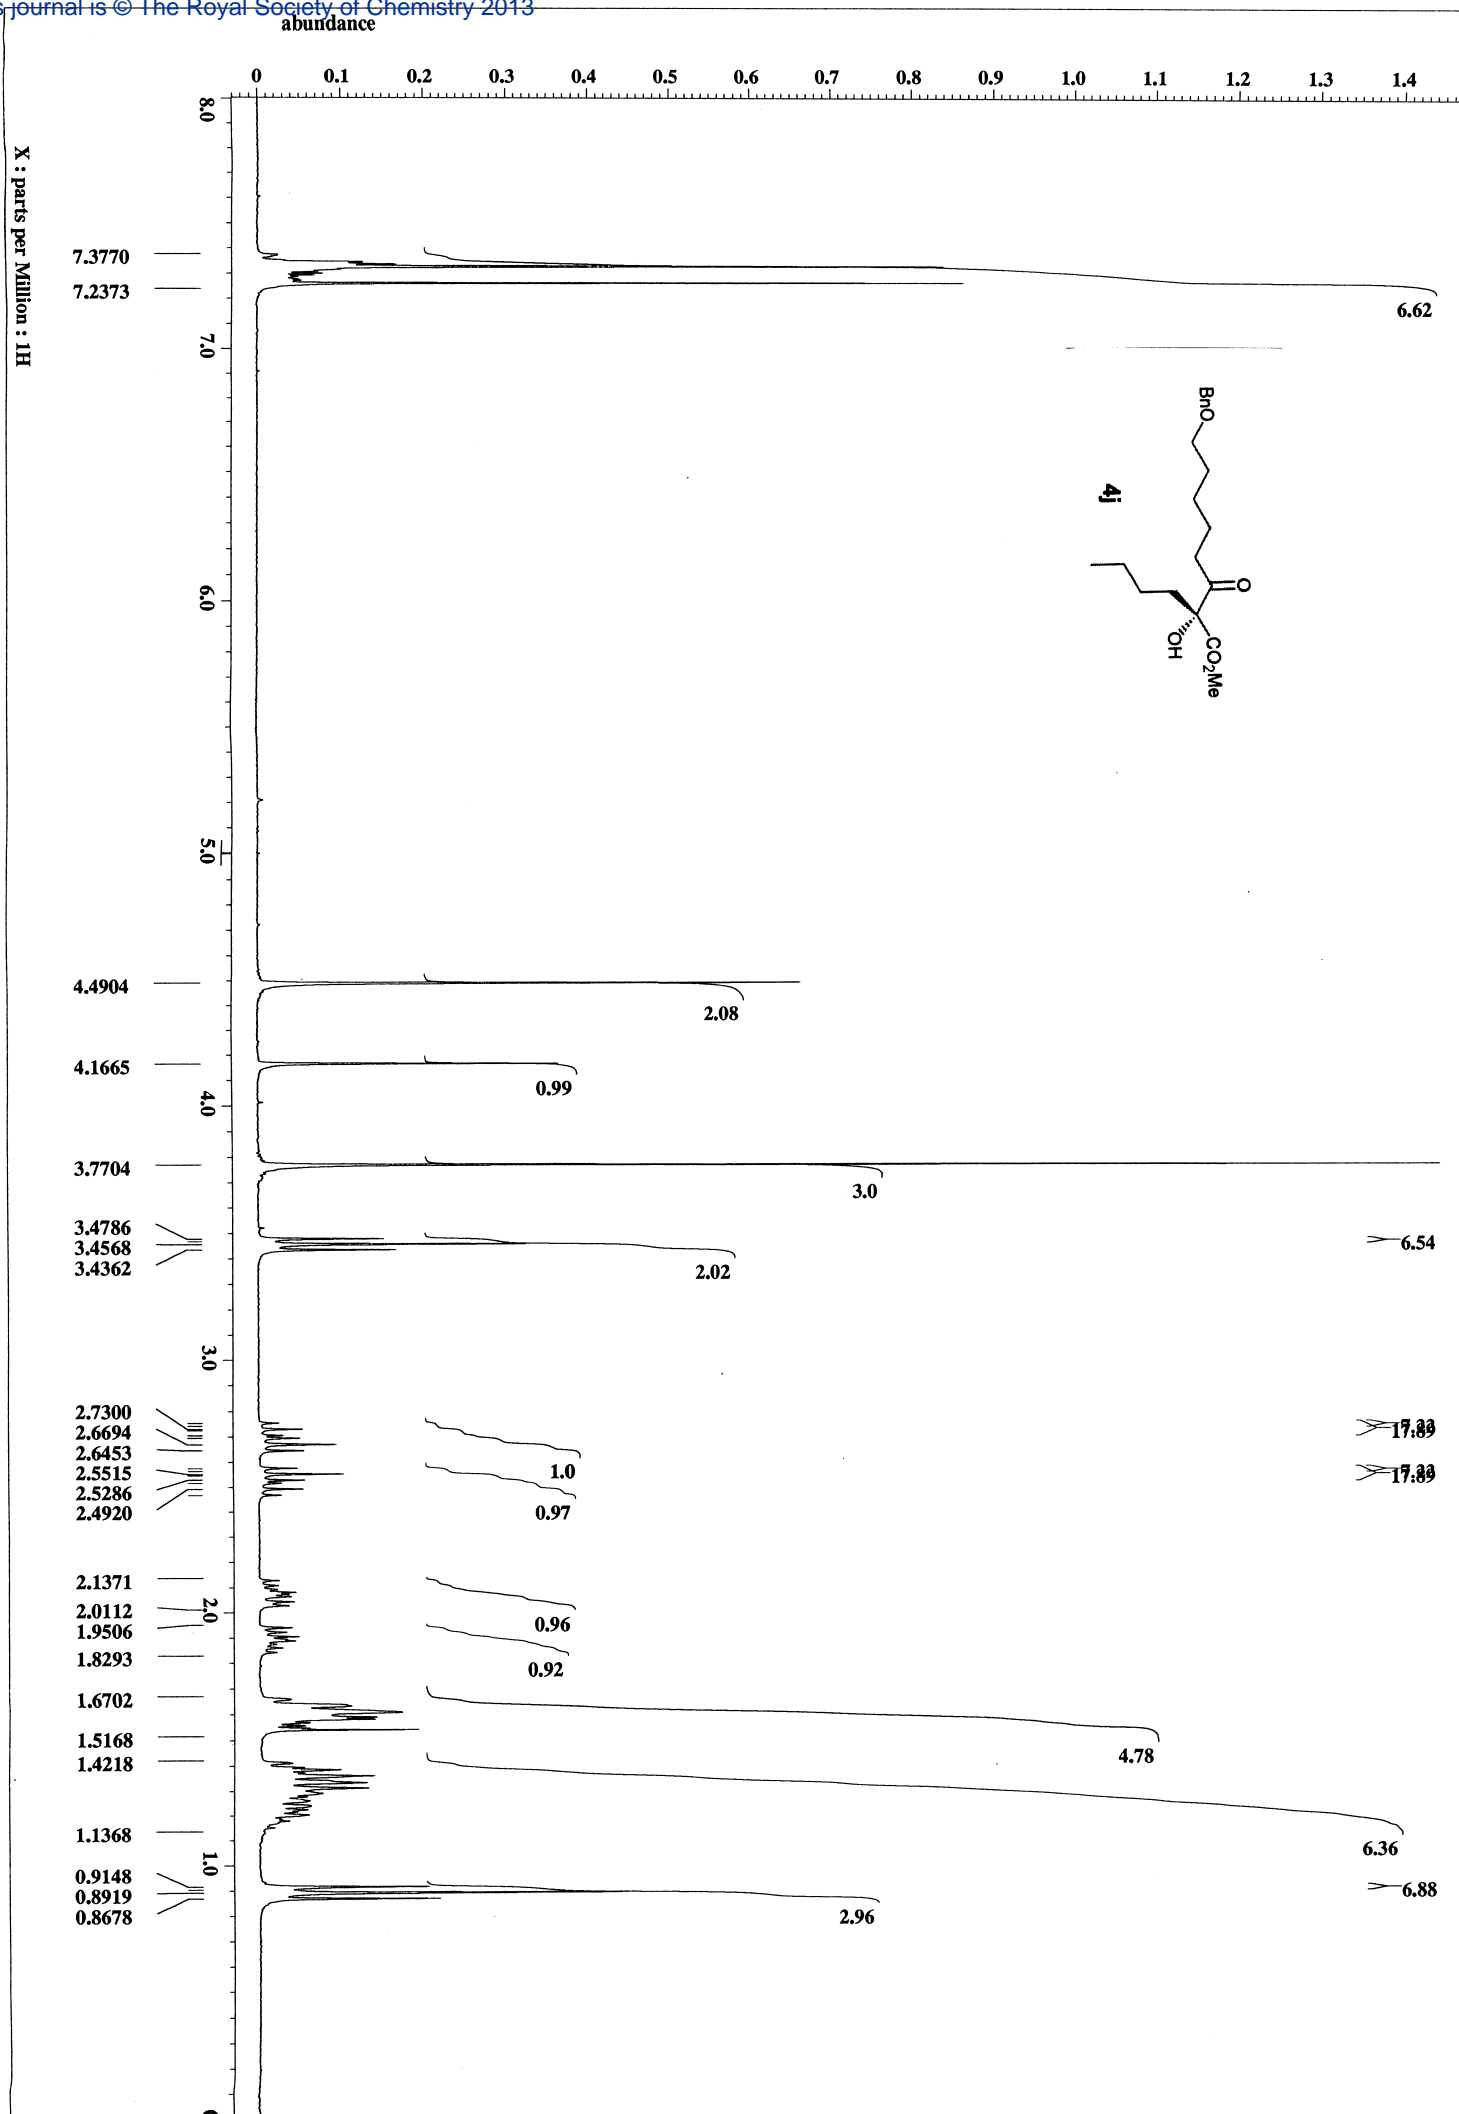

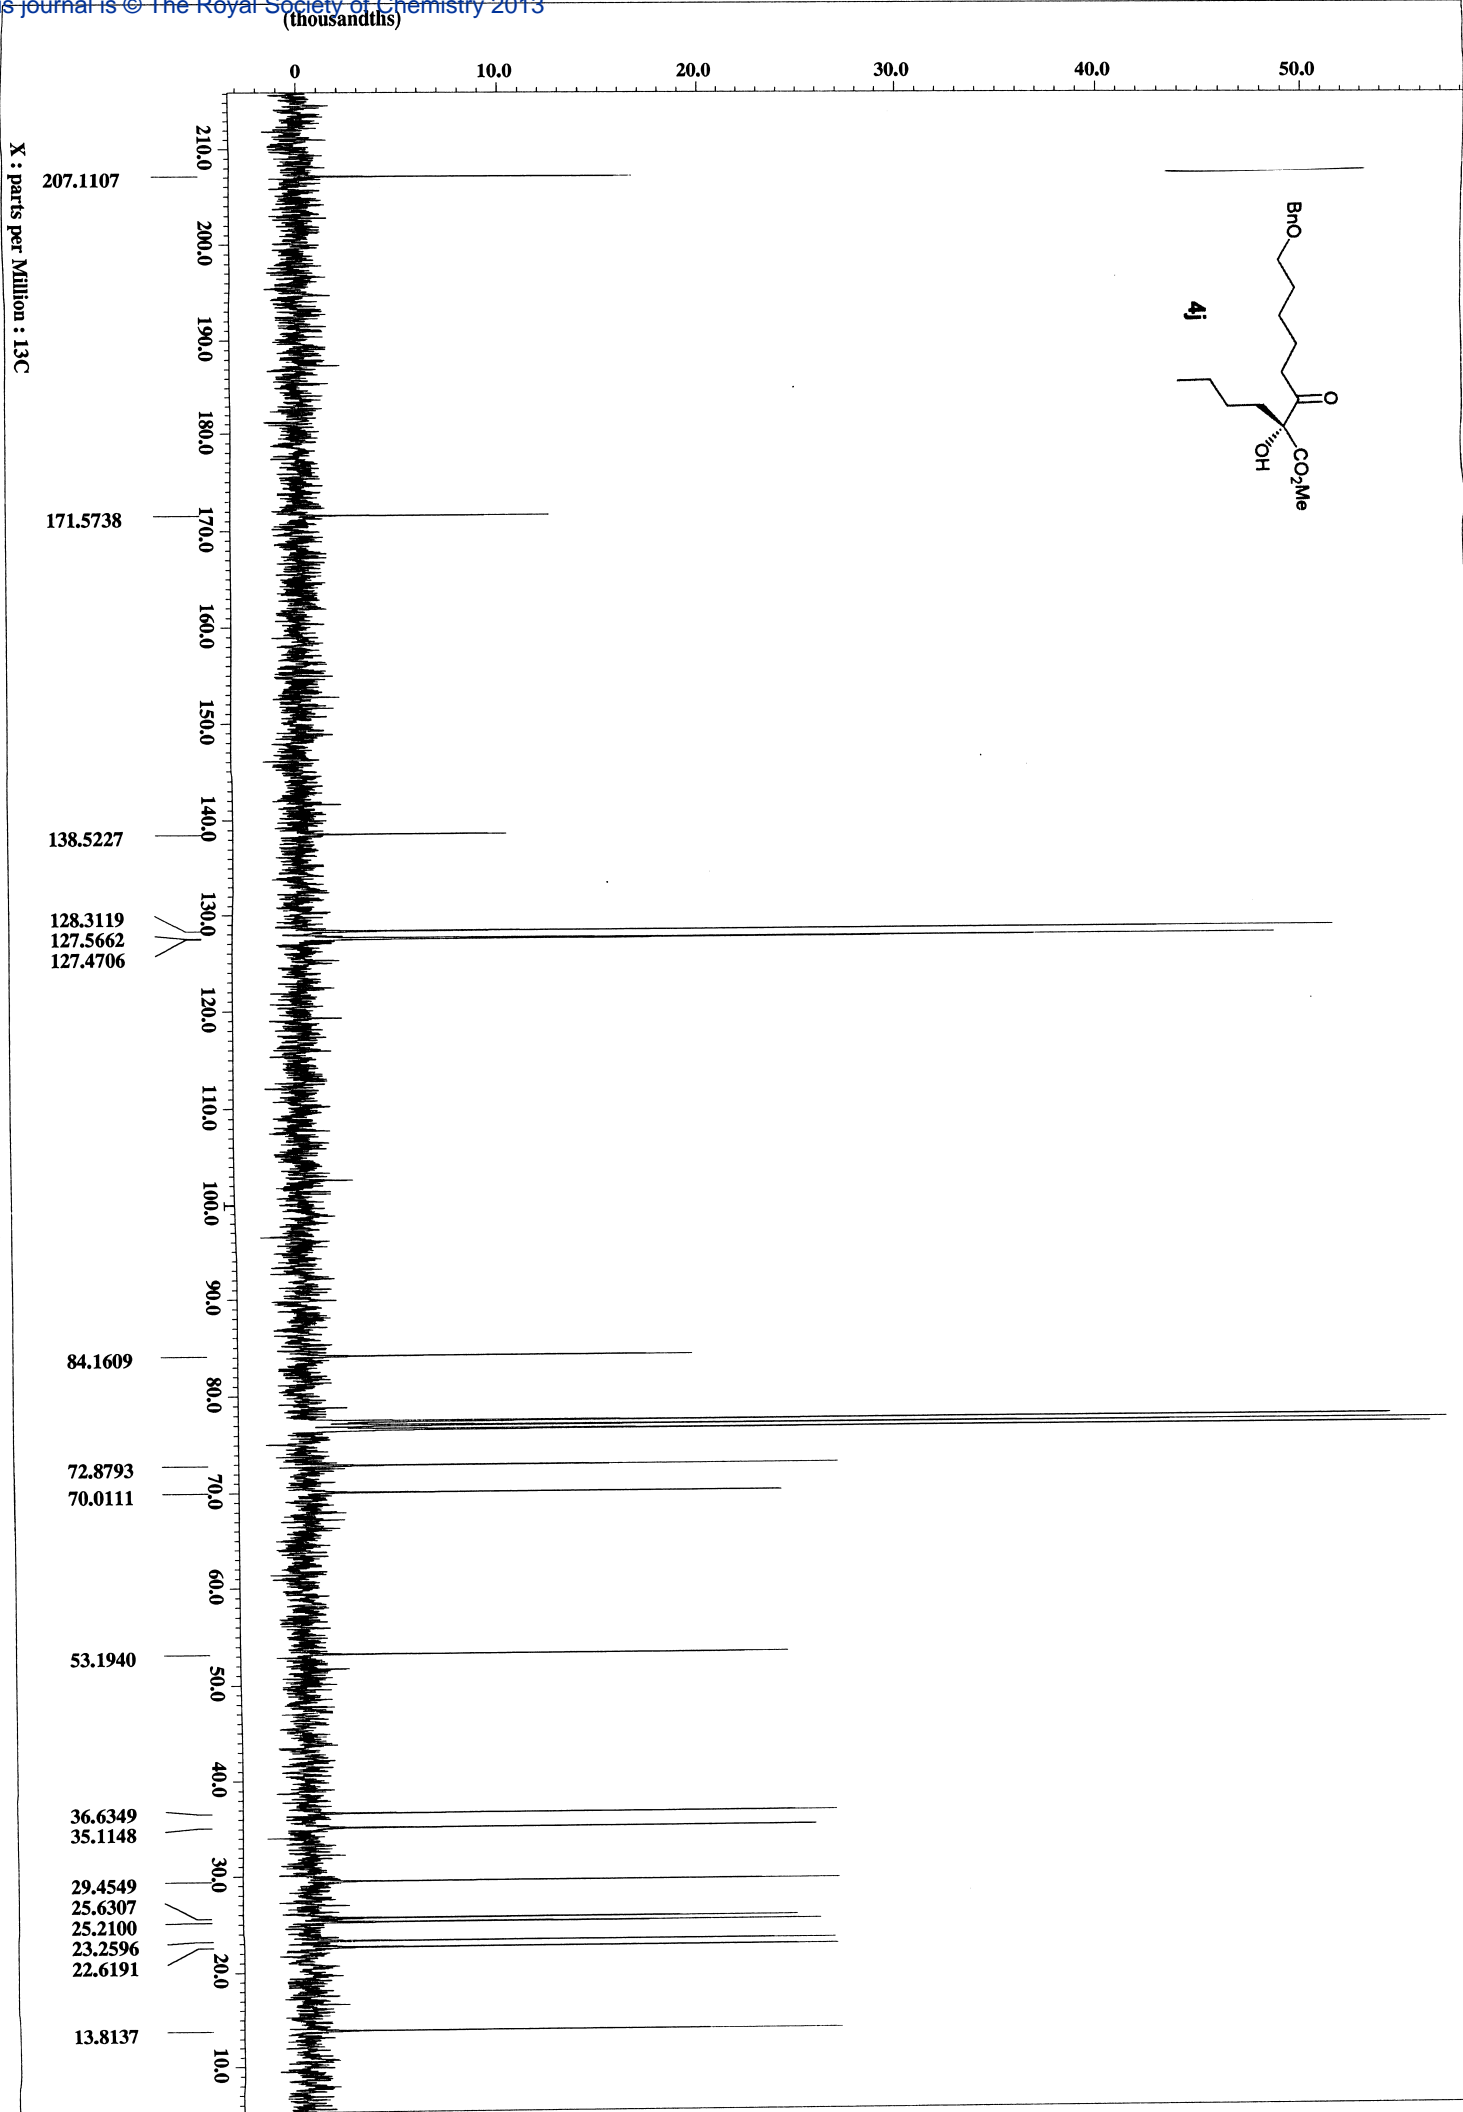



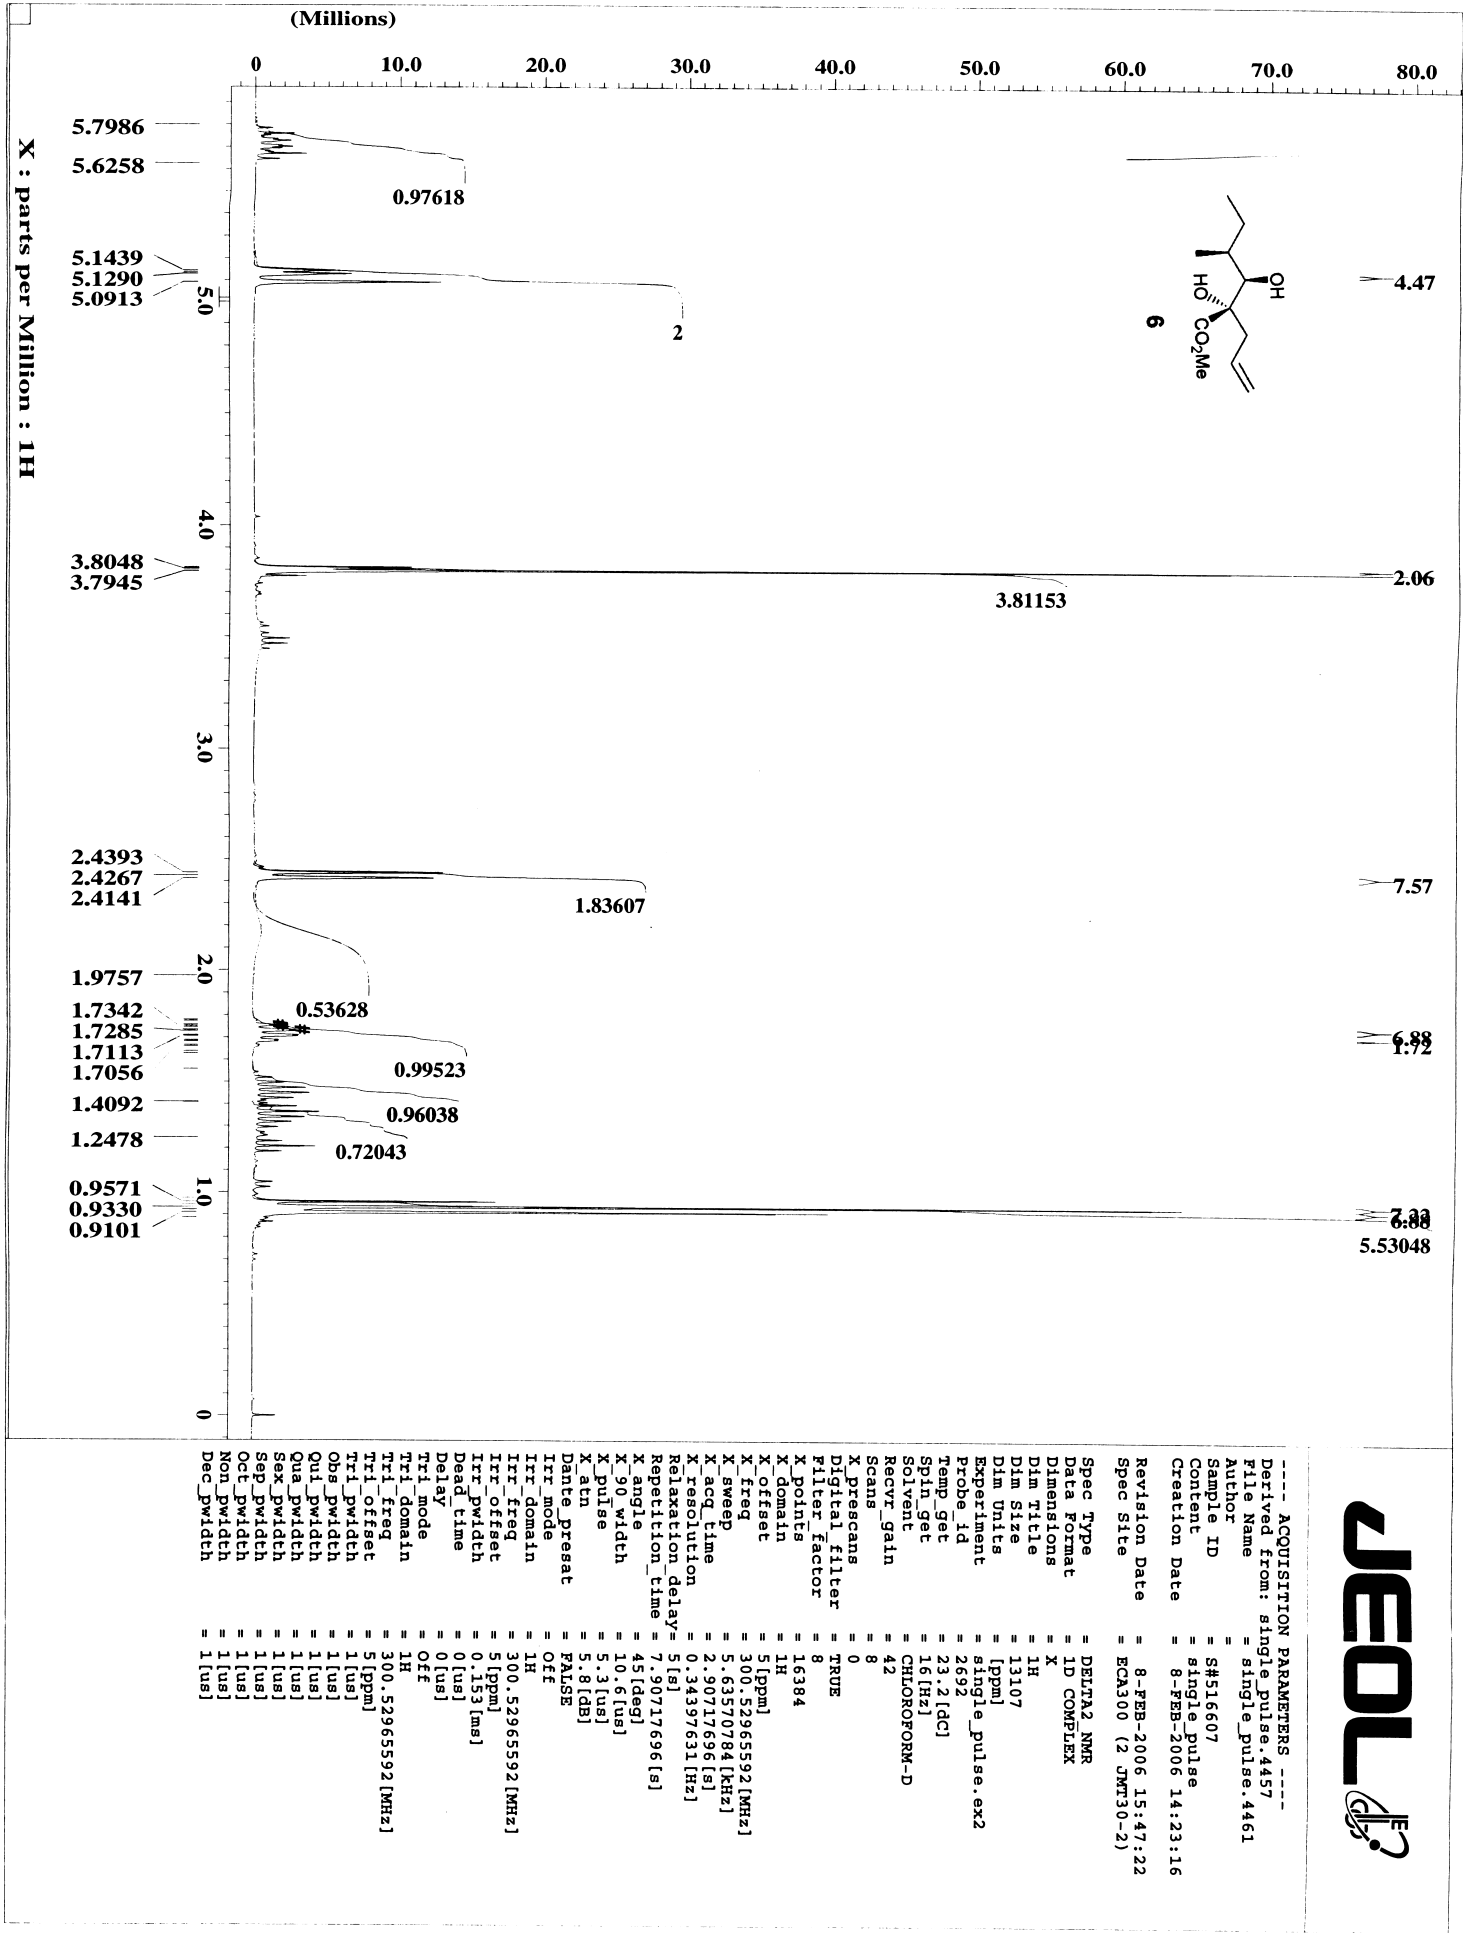

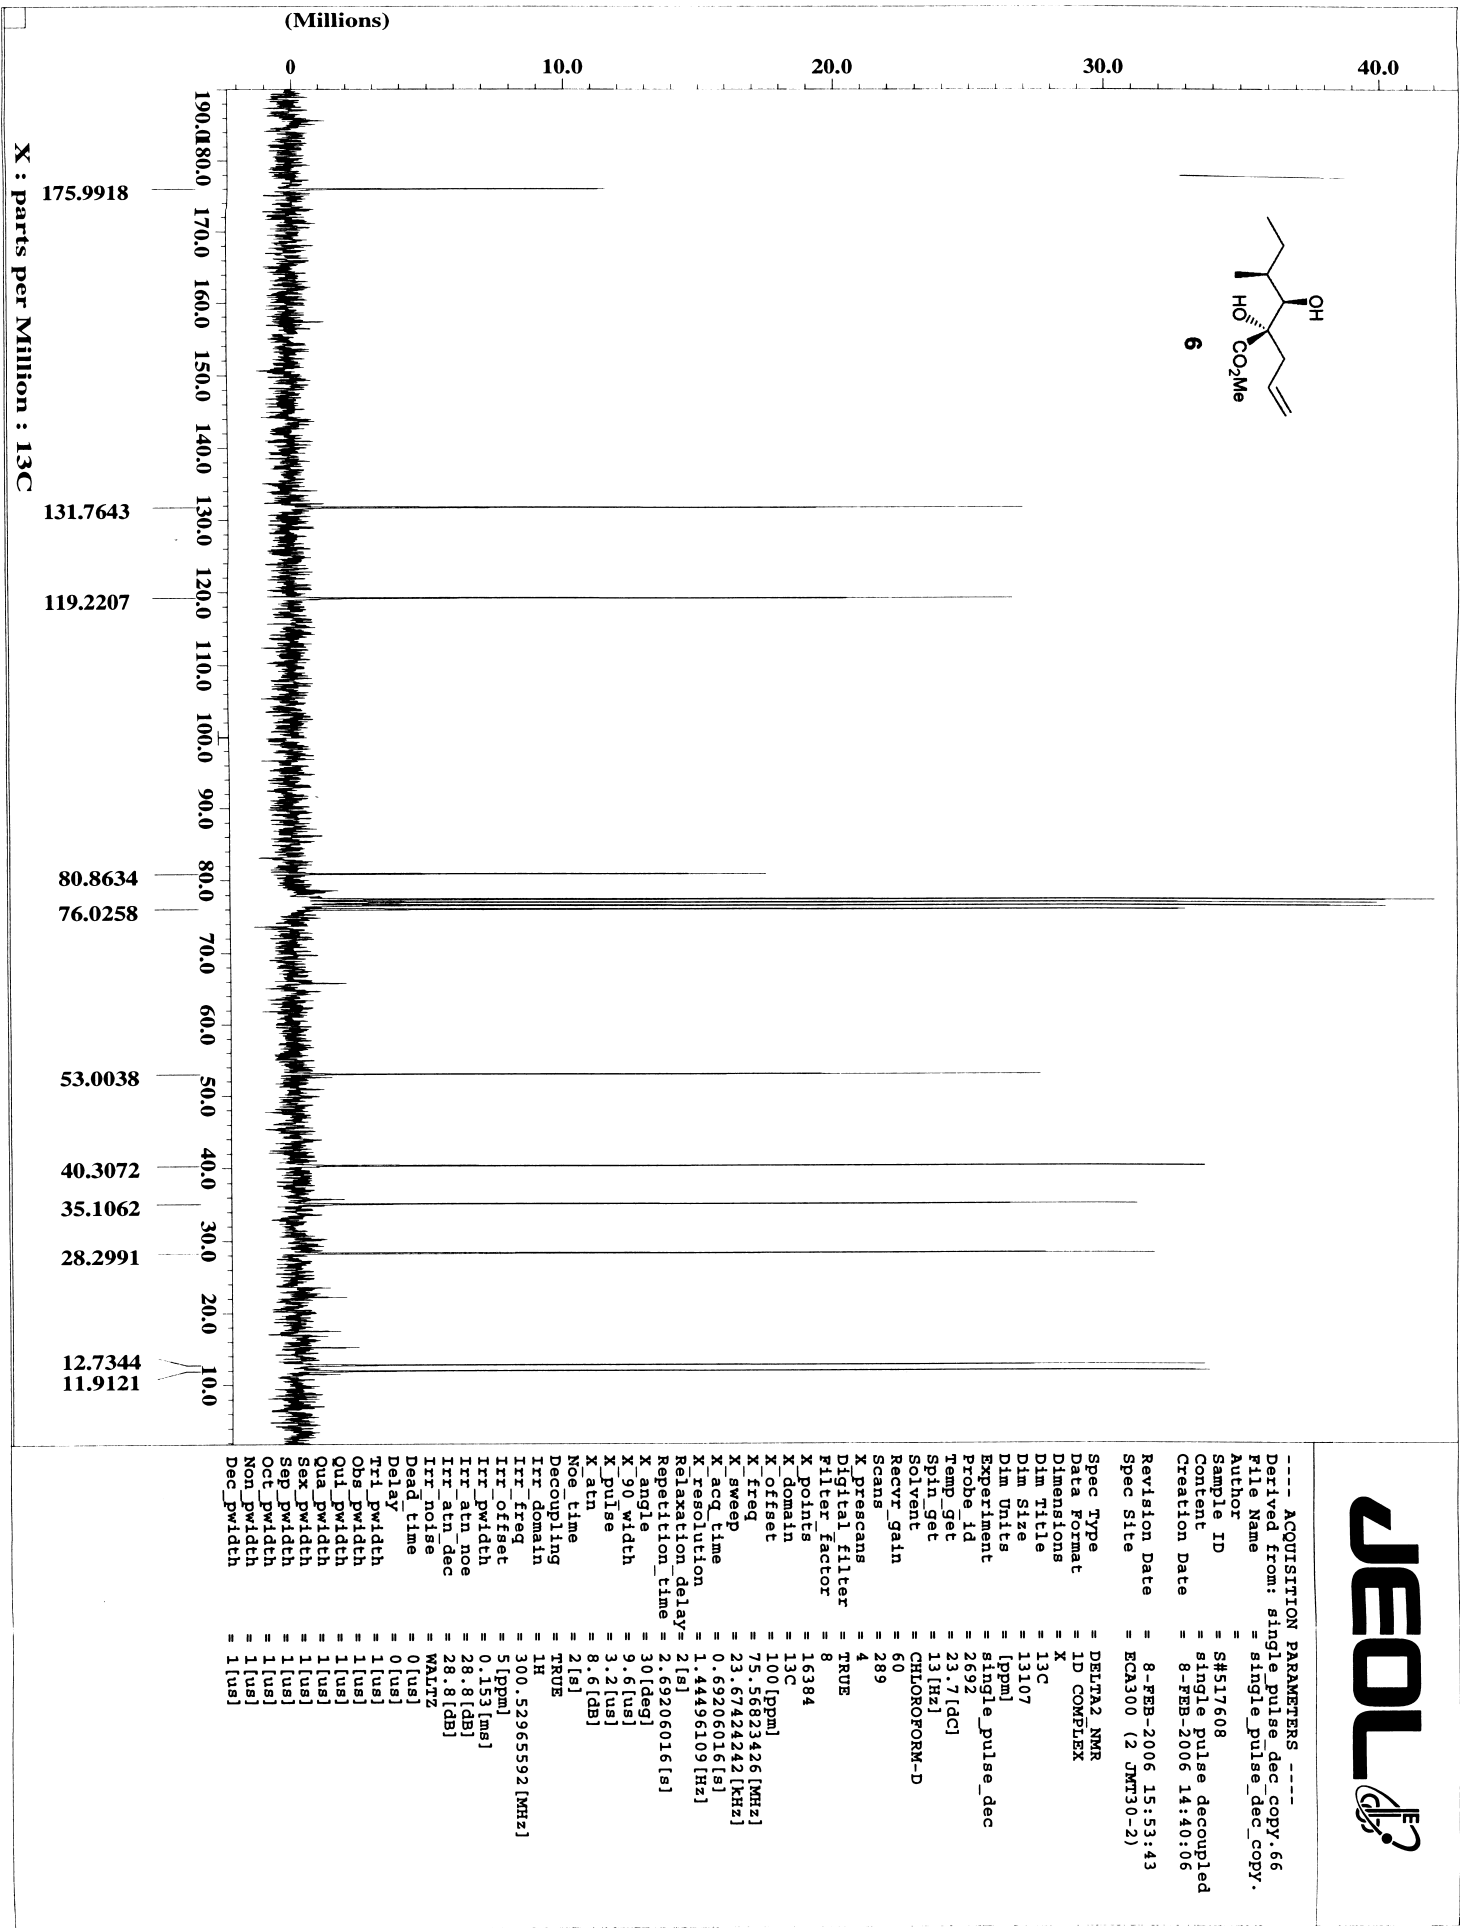

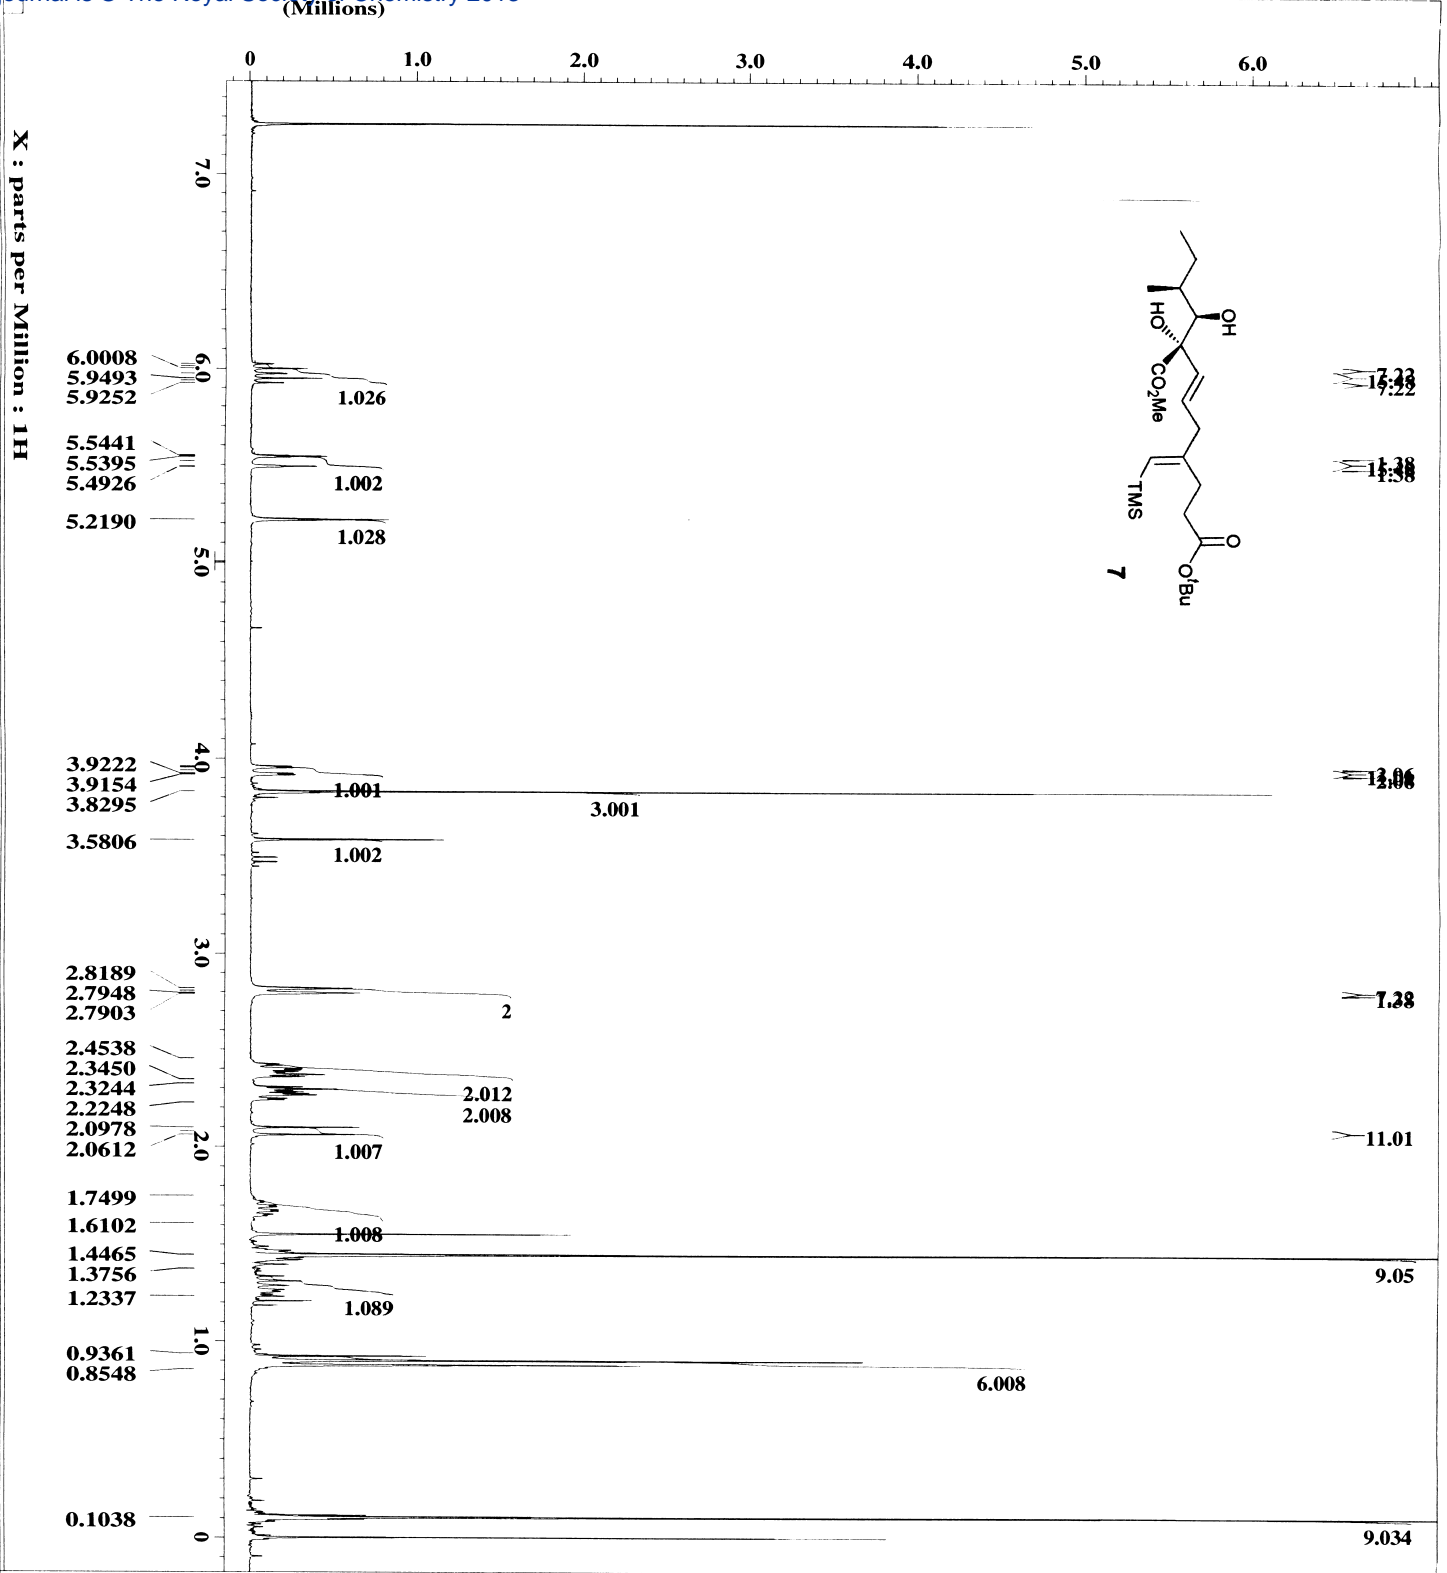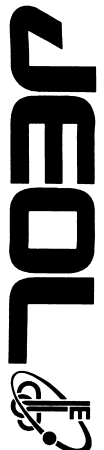

----- ACQUISITION PARAMETERS -----  
Derived from: single\_pulse.7366  
File Name = single\_pulse.7370  
Author = delta  
Sample ID = YO-866  
Content = single\_pulse  
Creation Date = 26-OCT-2007 16:20:10  
Revision Date = 26-OCT-2007 16:30:06  
Spec Site = ECA300 (2 JMT30-2)  
Spec Type = DELTA2 NMR  
Data Format = 1D COMPLEX  
Dimensions = 1H  
Dim Title = 1H  
Dim Size = 13107  
Dim Units = [ppm]  
Field\_strength = 7.0586013 [T] (300 [MHz]  
X\_acq\_duration = 2.90717696 [s]  
X\_domain = 1H  
X\_freq = 300.52965592 [MHz]  
X\_offset = 5 [ppm]  
X\_points = 16384  
X\_prescans = 0  
X\_resolution = 0.34397631 [Hz]  
X\_sweep = 5.63570784 [kHz]  
X\_domain = 1H  
Xir\_freq = 300.52965592 [MHz]  
Xir\_offset = 5 [ppm]  
Xir\_domain = 1H  
Xir\_freq = 300.52965592 [MHz]  
Xir\_offset = 5 [ppm]  
Mod\_return = 1  
Scans = 8  
Total\_scans = 8  
X\_90\_width = 10.6 [us]  
X\_acq\_time = 2.90717696 [s]  
X\_angle = 45 [deg]  
X\_atn = 5.8 [dB]  
X\_pulse = 5.3 [us]  
Xir\_mode = Off  
Xir\_mode = Off  
Dante\_presat = FALSE  
Initial\_wait = 1 [s]  
Relaxation\_delay = 5 [s]  
Repetition\_time = 7.90717696 [s]

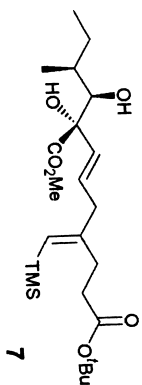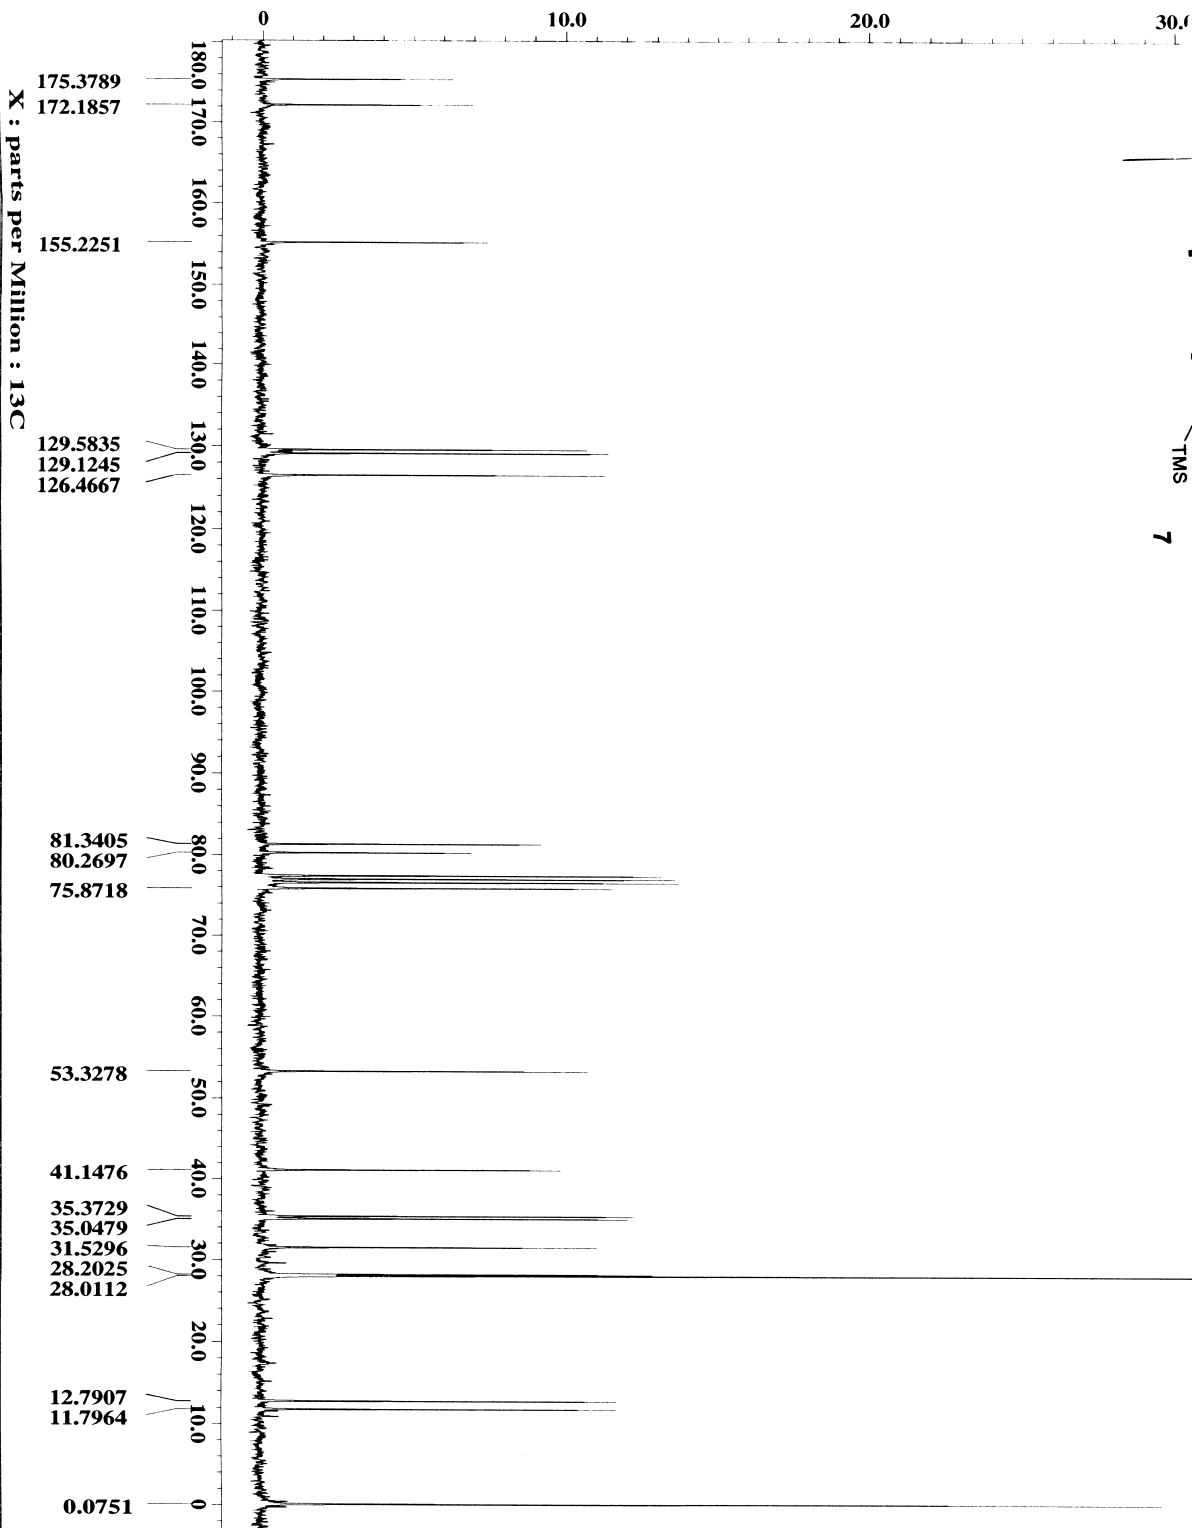

----- ACQUISITION PARAMETERS -----  
 File Name = single\_pulse\_dec.318  
 Author = delta  
 Sample ID = VO-866  
 Content = single pulse decouple  
 Creation Date = 26-OCT-2007 16:40:03  
 Revision Date = 26-OCT-2007 16:34:40  
 Spec Site = ECA300 (2 JMT30-2)  
 Spec Type = DELTA2 NMR  
 Data Format = 1D COMPLEX  
 Dimensions = X  
 Dim Title = 13C  
 Dim Size = 13107  
 Dim Units = [ppm]  
 Field strength = 7.0586013 [T] (300 [MHz]  
 X\_acq\_duration = 0.69206016 [s]  
 X\_domain = 13C  
 X\_freq = 75.56823426 [MHz]  
 X\_offset = 100 [ppm]  
 X\_points = 16384  
 X\_prescans = 4  
 X\_resolution = 1.44496109 [Hz]  
 X\_sweep = 23.67424242 [kHz]  
 Irr\_domain = 1H  
 Irr\_freq = 300.52965592 [MHz]  
 Irr\_offset = 5 [ppm]  
 Mod\_return = 1  
 Scans = 361  
 Total\_scans = 361  
 X\_90\_width = 9.4 [us]  
 X\_acq\_time = 0.69206016 [s]  
 X\_angle = 30 [deg]  
 X\_atn = 8.6 [dB]  
 X\_pulse = 3.13333333 [us]  
 Irr\_atn\_dec = 29.7 [dB]  
 Irr\_atn\_noe = 29.7 [dB]  
 Irr\_noise = TRUE  
 Decoupling = WALTZ  
 Initial\_wait = 1 [s]  
 Noe = TRUE  
 Noe\_time = 2 [s]  
 Relaxation\_delay = 2 [s]  
 Repetition\_time = 2.69206016 [s]

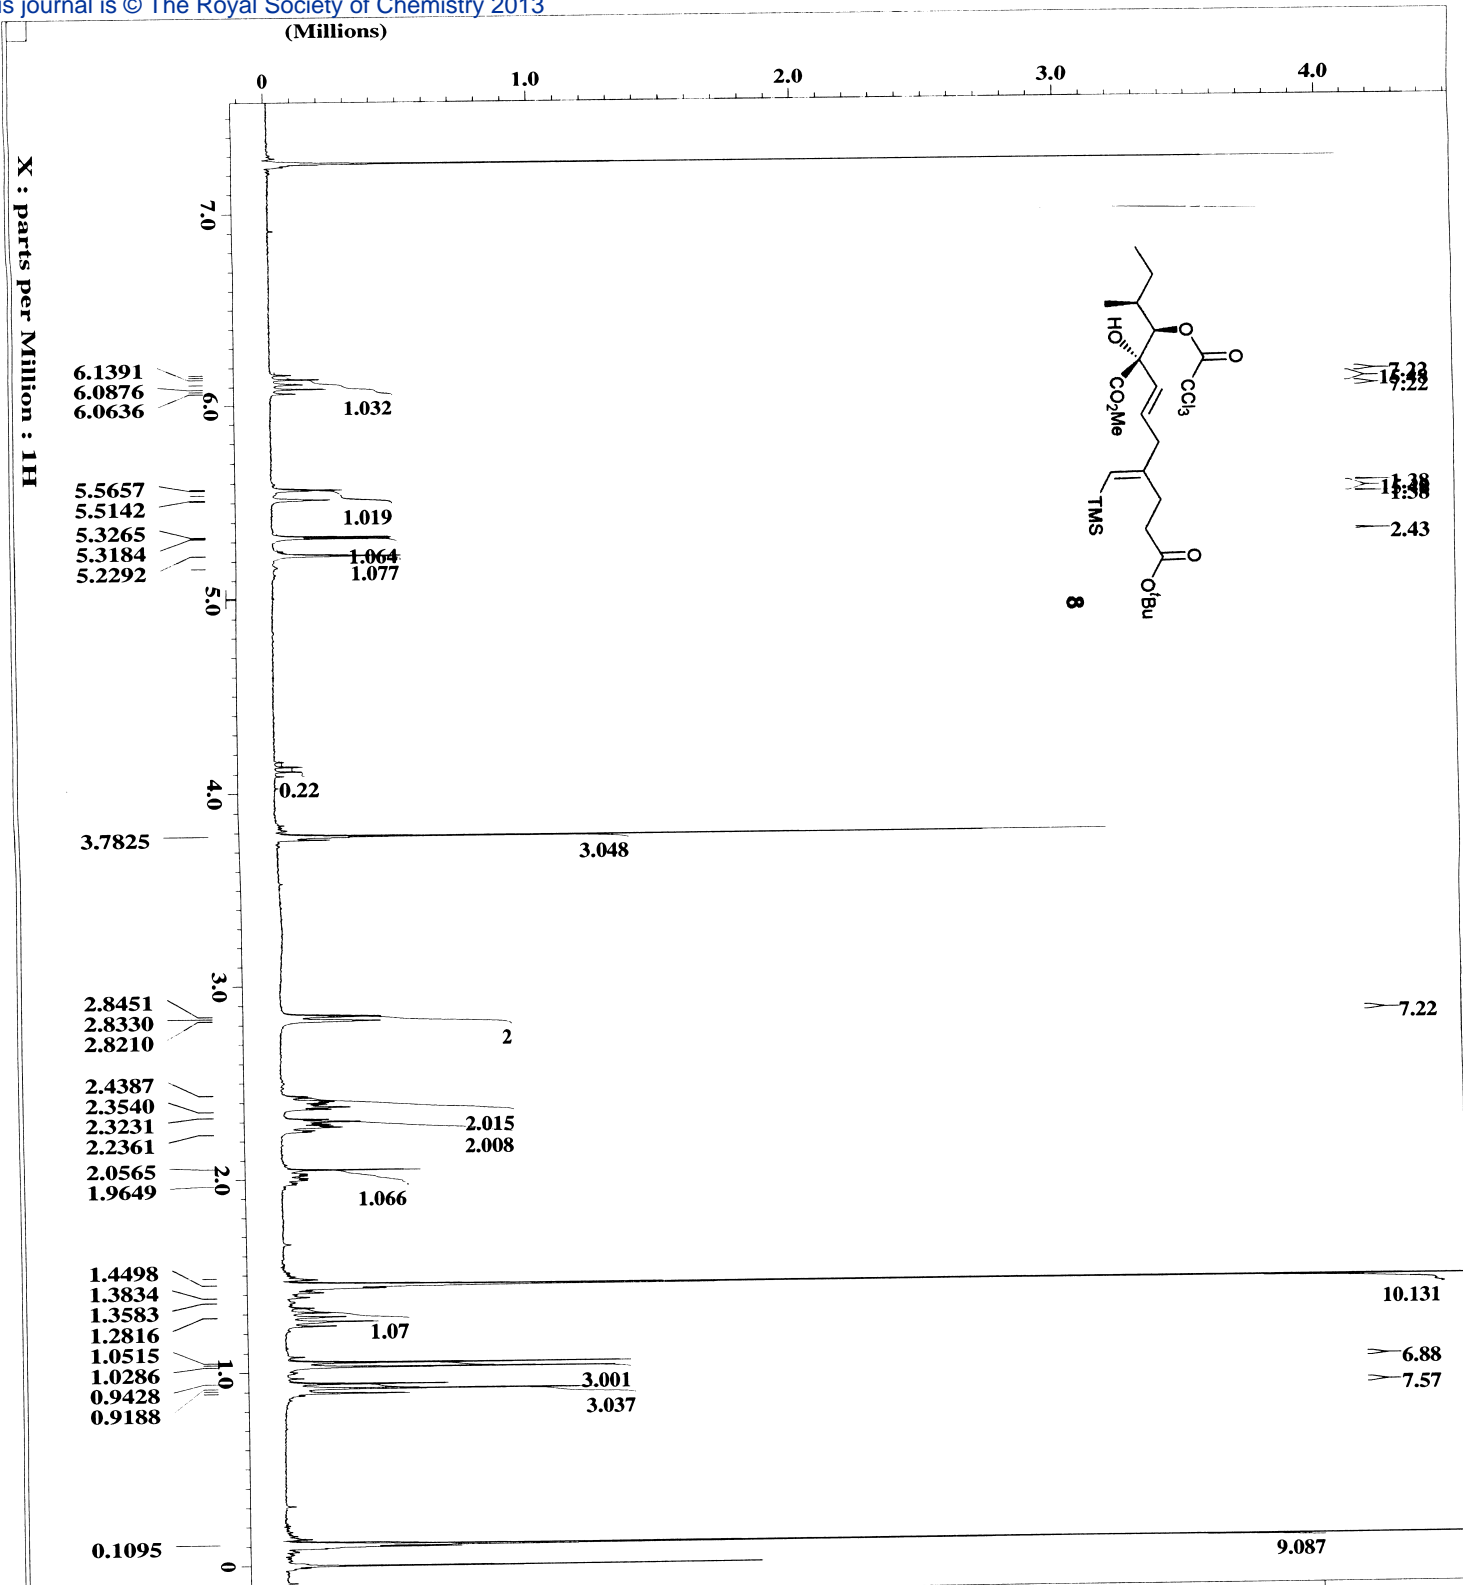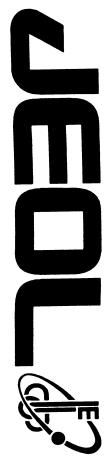

----- ACQUISITION PARAMETERS -----  
Derived from: YO-945 crd1 1H.2  
File Name = YO-945 crd1 1H.3  
Author = delta  
Sample ID = YO-945 CRD  
Content = single pulse  
Creation Date = 7-JAN-2008 15:34:52  
Revision Date = 7-JAN-2008 16:11:02  
Spec Site = ECA300 (2 JMT30-2)  
Spec Type = DELTA2 NMR  
Data Format = 1D COMPLEX  
Dimensions = X  
Dim Title = 1H  
Dim Size = 13107  
Dim Units = [ppm]  
Field strength = 7.0586013 [T] (300 [MHz]  
X\_acq\_duration = 2.90717696 [s]  
X\_domain = 1H  
X\_freq = 300.52965592 [MHz]  
X\_offset = 5 [ppm]  
X\_points = 16384  
X\_prescans = 0  
X\_resolution = 0.34397631 [Hz]  
X\_sweep = 5.63570784 [kHz]  
Irr\_domain = 1H  
Irr\_freq = 300.52965592 [MHz]  
Irr\_offset = 5 [ppm]  
Tri\_domain = 1H  
Tri\_freq = 300.52965592 [MHz]  
Tri\_offset = 5 [ppm]  
Mod\_return = 1  
Scans = 8  
Total\_scans = 8  
X\_90\_width = 10.6 [us]  
X\_acq\_time = 2.90717696 [s]  
X\_angle = 45 [deg]  
X\_atn = 5.8 [dB]  
X\_atn = 5.3 [us]  
X\_pulse = Off  
Irr\_mode = Off  
Dante\_presat = FALSE  
Initial\_wait = 1 [s]  
Relaxation\_delay = 5 [s]  
Repetition\_time = 7.90717696 [s]

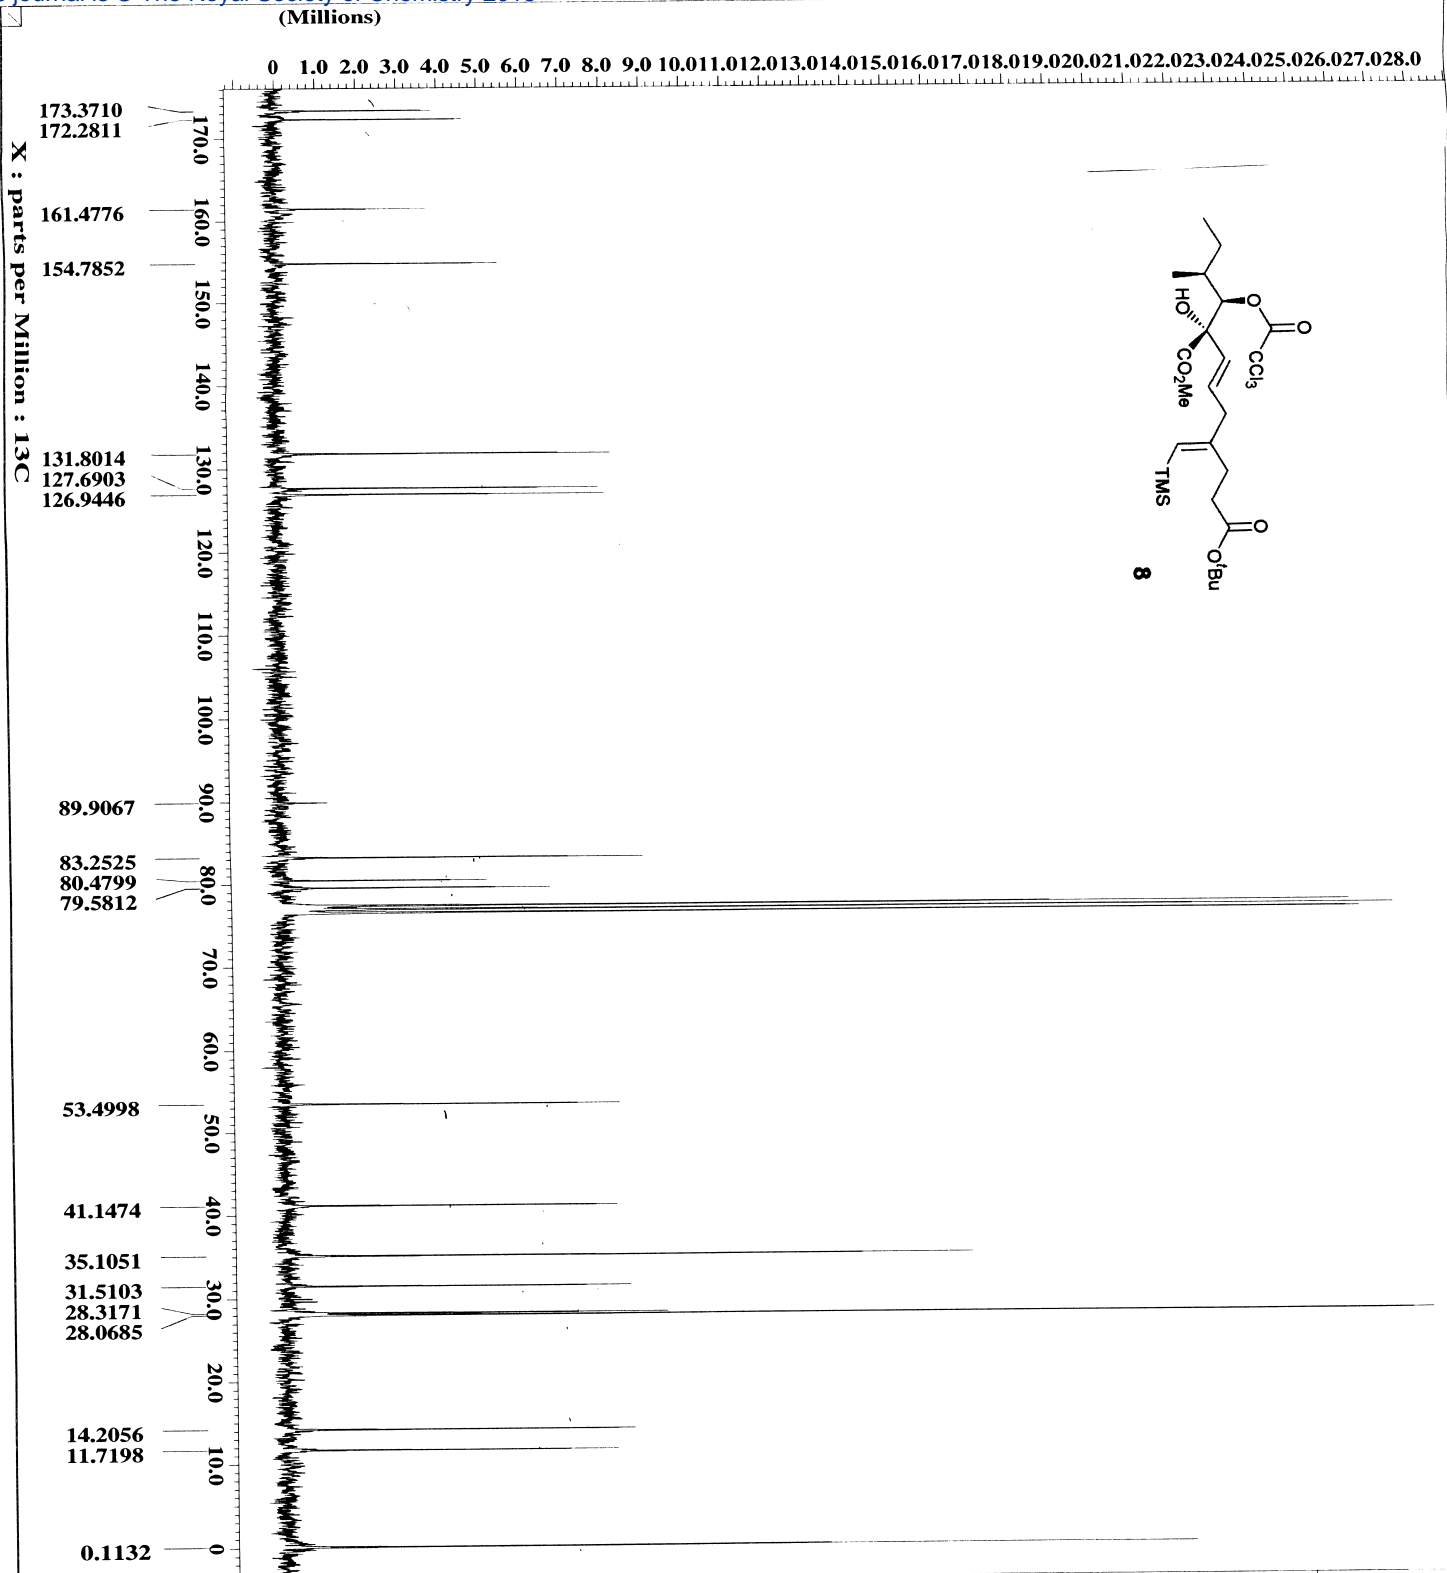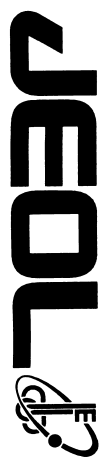

----- ACQUISITION PARAMETERS -----  
File Name = single\_pulse\_dec.111  
Author = delta  
Sample ID = YO-945  
Content = single pulse decouple  
Creation Date = 7-JAN-2008 16:31:52  
Revision Date = 7-JAN-2008 16:26:21  
Spec Site = ECA300 (2 JMT30-2)  
Spec Type = DELTA2 NMR  
Data Format = 1D COMPLEX  
Dimensions = X  
Dim Title = 13C  
Dim Size = 13107  
Dim Units = [ppm]  
Field strength = 7.0586013 [T] (300 [MHz]  
X acq\_duration = 0.69206016 [s]  
X\_domain = 13C  
X\_freq = 75.56823426 [MHz]  
X\_offset = 100.1 [ppm]  
X\_points = 16384  
X\_prescans = 4  
X\_resolution = 1.44496109 [Hz]  
X\_sweep = 23.67424242 [kHz]  
Irr\_domain = 1H  
Irr\_freq = 300.52965592 [MHz]  
Irr\_offset = 5 [ppm]  
Mod\_return = 1  
Scans = 648  
Total\_scans = 648  
X\_90\_width = 9.4 [us]  
X\_acq\_time = 0.69206016 [s]  
X\_angle = 30 [deg]  
X\_atn = 8.6 [dB]  
X\_pulse = 3.13333333 [us]  
Irr\_atn\_dec = 29.7 [dB]  
Irr\_atn\_noe = 29.7 [dB]  
Irr\_noise = WALTZ  
Decoupling = TRUE  
Initial\_wait = 1 [s]  
Noe = TRUE  
Noe\_time = 2 [s]  
Relaxation\_delay = 2 [s]  
Repetition\_time = 2.69206016 [s]

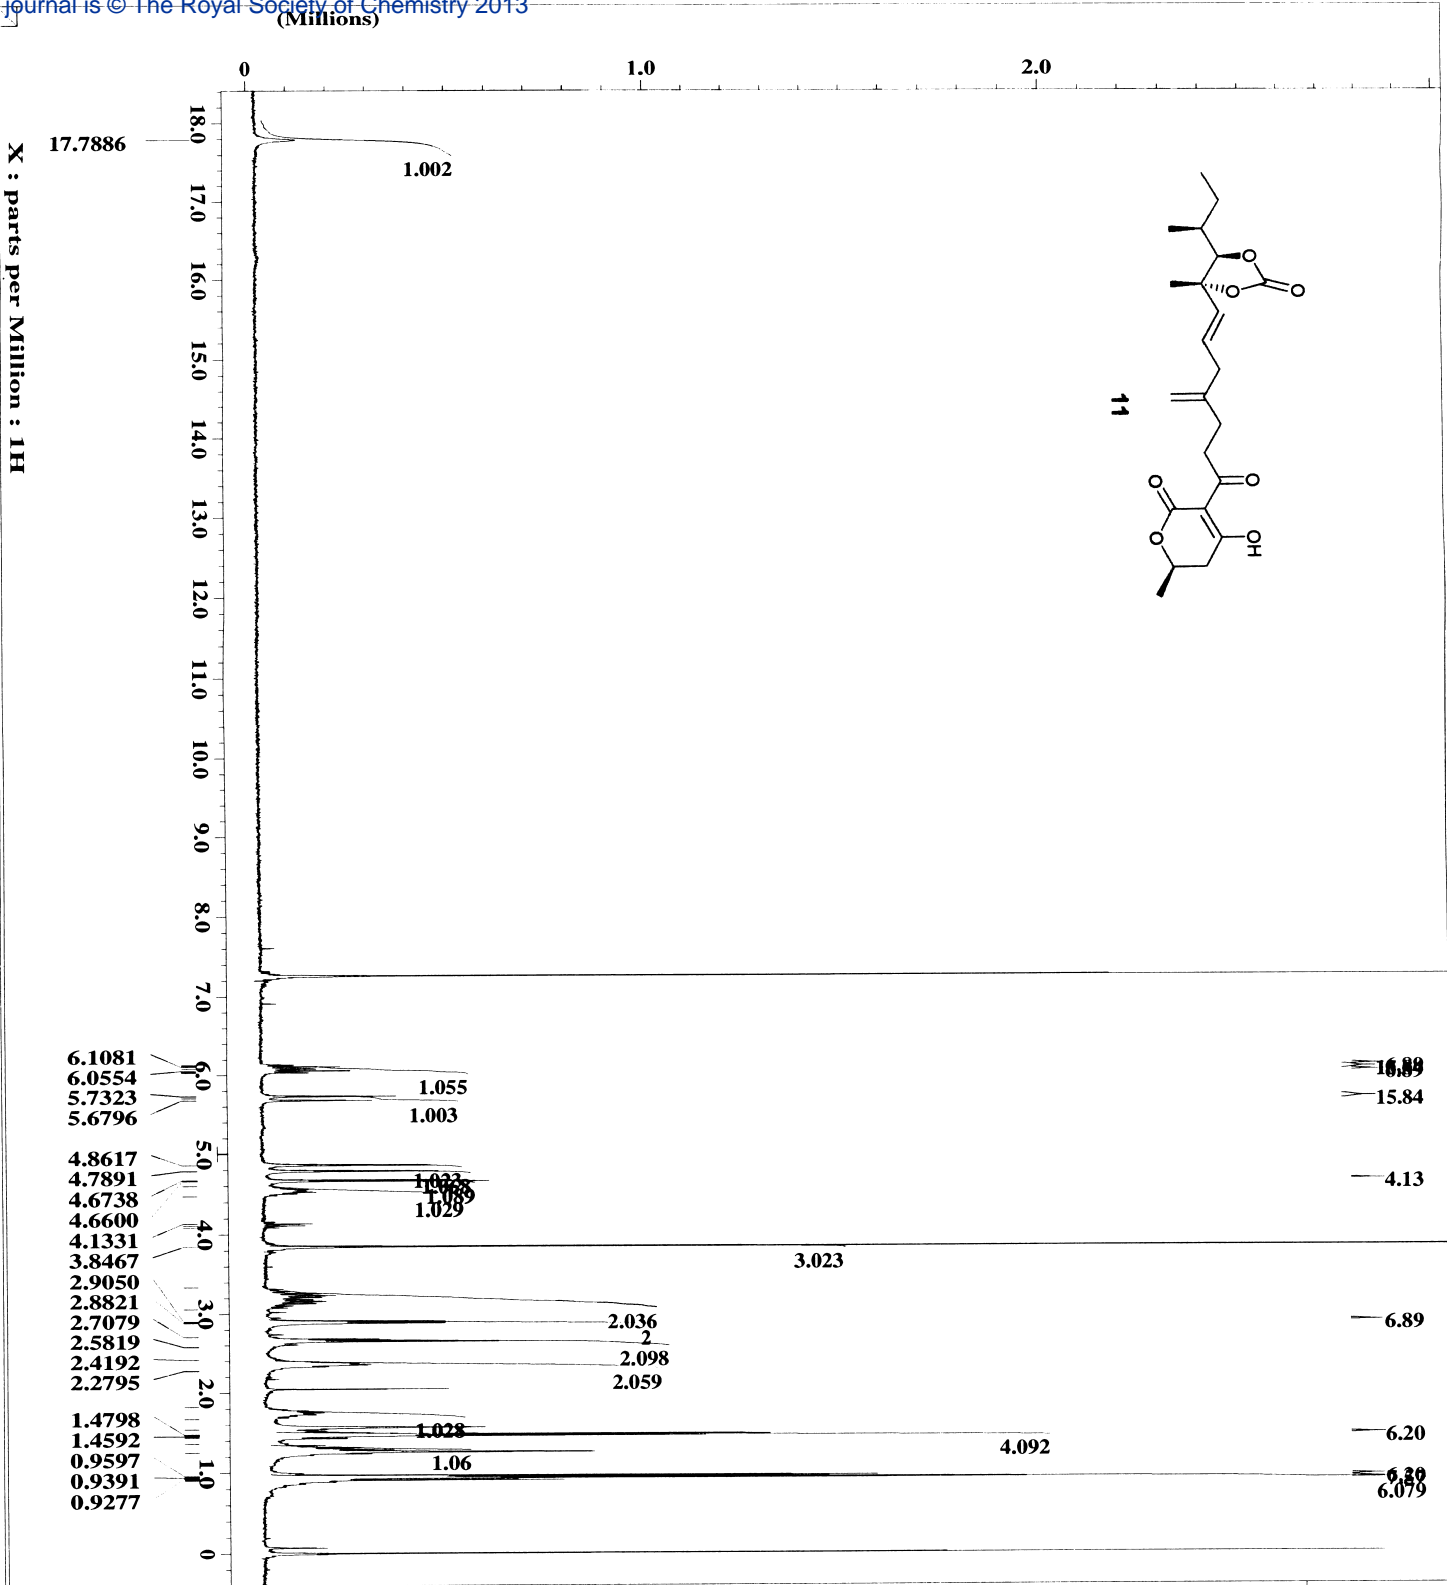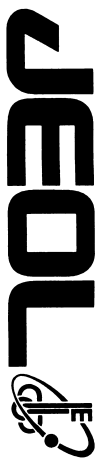

----- ACQUISITION PARAMETERS -----  
Derived from: single\_pulse.2914  
File Name = single\_pulse.2918  
Author = delta  
Sample ID = YO-956  
Content = single\_pulse  
Creation Date = 19-JAN-2008 10:47:06  
Revision Date = 19-JAN-2008 10:54:29  
Spec Site = ECA300 (2 JMT30-2)  
  
Spec Type = DELTA2 NMR  
Data Format = 1D COMPLEX  
Dimensions = X  
Dim Title = 1H  
Dim Size = 13107  
Dim Units = [ppm]  
Field\_strength = 7.0586013 [T] (300 [MHz]  
X\_acq\_duration = 1.4522776 [s]  
X\_domain = 1H  
X\_freq = 300.52965592 [MHz]  
X\_offset = 5 [ppm]  
X\_points = 16384  
X\_prescans = 0  
X\_resolution = 0.68857351 [Hz]  
X\_sweep = 11.28158845 [kHz]  
Xir\_domain = 1H  
Xir\_freq = 300.52965592 [MHz]  
Xir\_offset = 5 [ppm]  
Xir\_domain = 1H  
Xir\_freq = 300.52965592 [MHz]  
Xir\_offset = 5 [ppm]  
Mod\_return = 1  
Scans = 8  
Total\_scans = 8  
  
X\_90\_width = 11.6 [us]  
X\_acq\_time = 1.4522776 [s]  
X\_angle = 45 [deg]  
X\_atn = 5.8 [dB]  
X\_pulse = 5.8 [us]  
Xir\_mode = Off  
Xir\_mode = PALSE  
Dante\_presat = 1 [s]  
Initial\_wait = 5 [s]  
Relaxation\_delay = 6.4522776 [s]  
Repetition\_time = 6.4522776 [s]

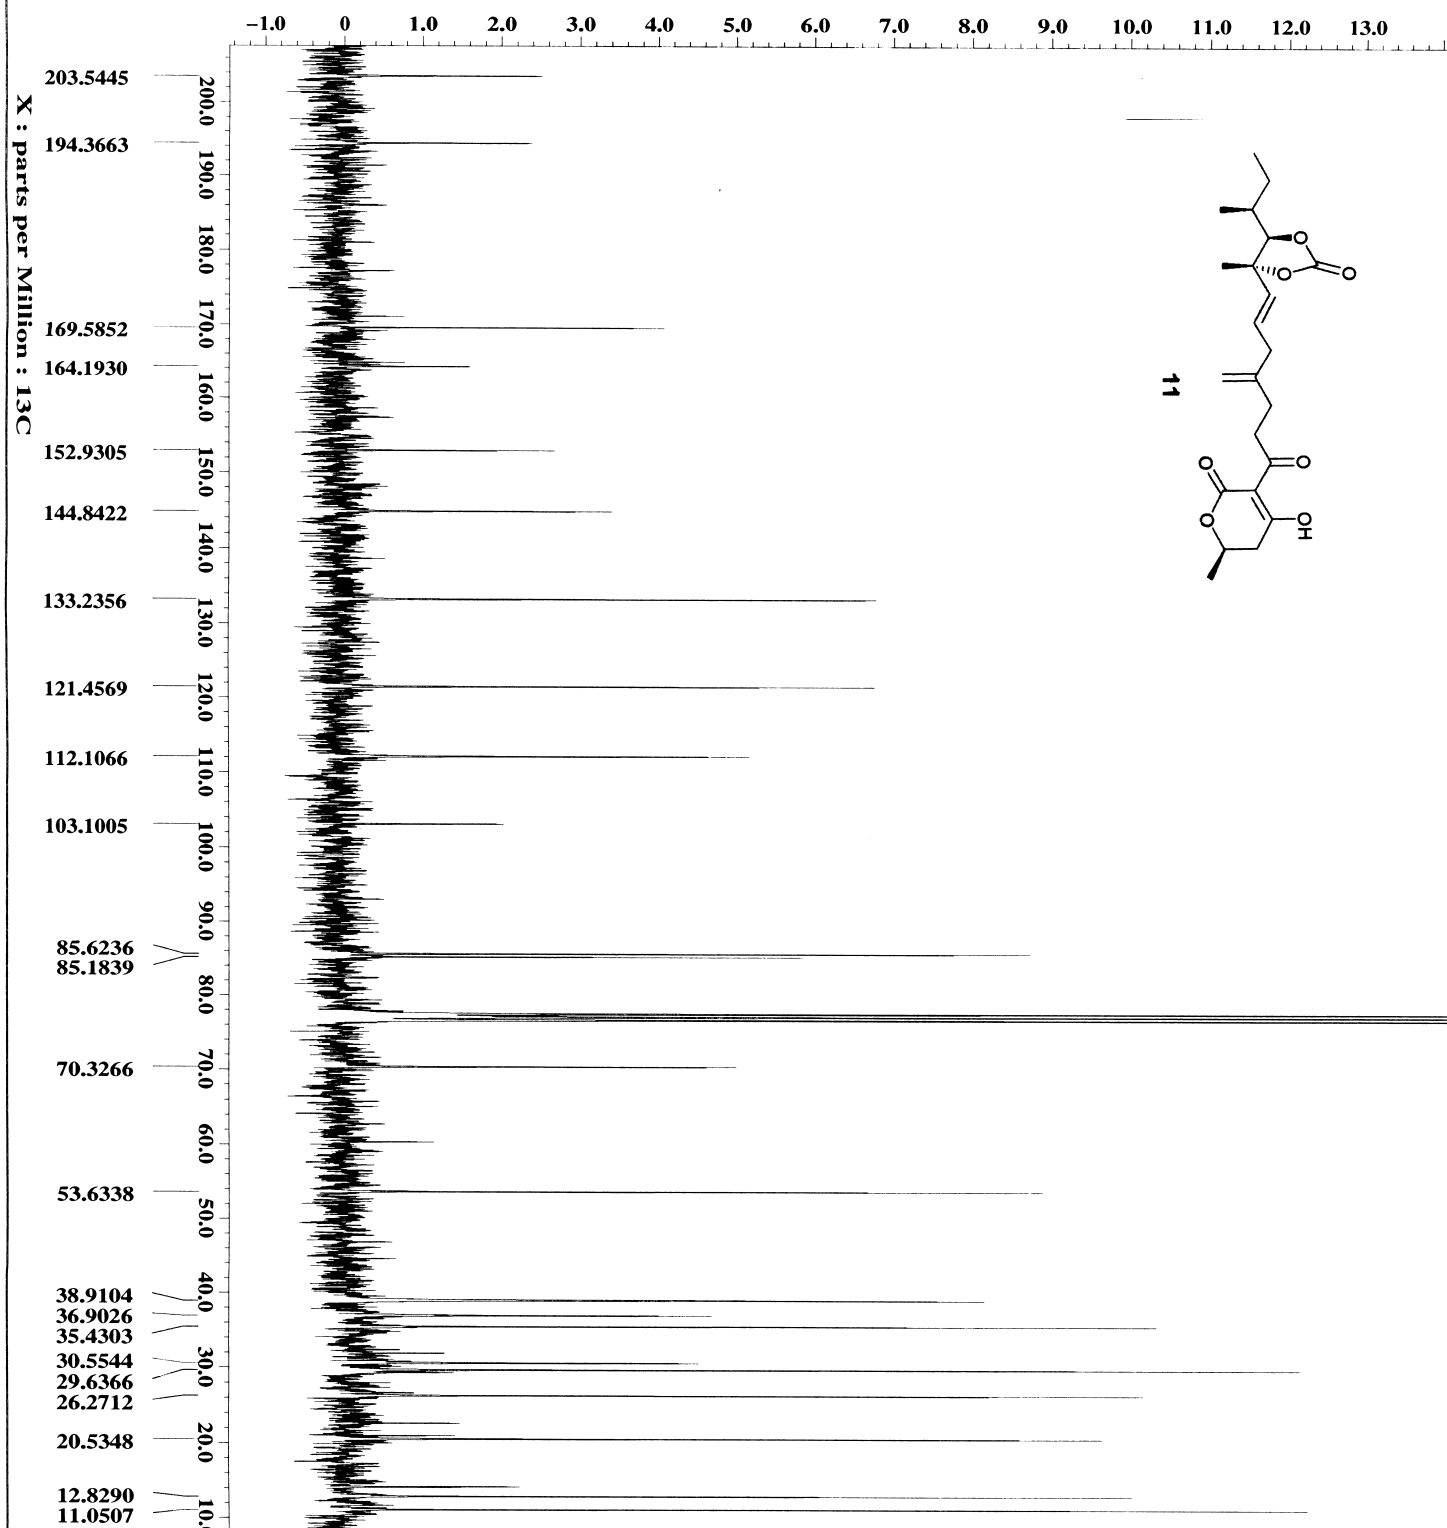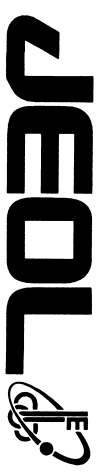

----- ACQUISITION PARAMETERS -----  
File Name = single\_pulse\_dec.172  
Author = delta  
Sample ID = YO-956  
Content = single pulse decouple  
Creation Date = 19-JAN-2008 21:52:25  
Revision Date = 19-JAN-2008 21:47:33  
Spec Site = ECA300 (2 JMT30-2)  
Spec Type = DELTA2 NMR  
Data Format = 1D COMPLEX  
Dimensions = X  
Dim Title = 13C  
Dim Size = 13107  
Dim Units = [ppm]  
Field strength = 7.0586013 [T] (300 [MHz]  
X\_acq\_duration = 0.69206016 [s]  
X\_domain = 13C  
X\_freq = 75.56823426 [MHz]  
X\_offset = 100 [ppm]  
X\_points = 16384  
X\_prescans = 4  
X\_resolution = 1.44496109 [Hz]  
X\_sweep = 23.674242 [KHz]  
Irr\_domain = 1H  
Irr\_freq = 300.52965592 [MHz]  
Irr\_offset = 5 [ppm]  
Mod\_return = 1  
Scans = 921  
Total\_scans = 921  
X\_90\_width = 9.4 [us]  
X\_acq\_time = 0.69206016 [s]  
X\_angle = 30 [deg]  
X\_atn = 8.6 [dB]  
X\_pulse = 3.13333333 [us]  
Irr\_atn\_dec = 28.2 [dB]  
Irr\_atn\_noe = 28.2 [dB]  
Irr\_noise = WALTZ  
Decoupling = TRUE  
Initial\_wait = 1 [s]  
Noe = TRUE  
Noe\_time = 2 [s]  
Relaxation\_delay = 2 [s]  
Repetition\_time = 2.69206016 [s]



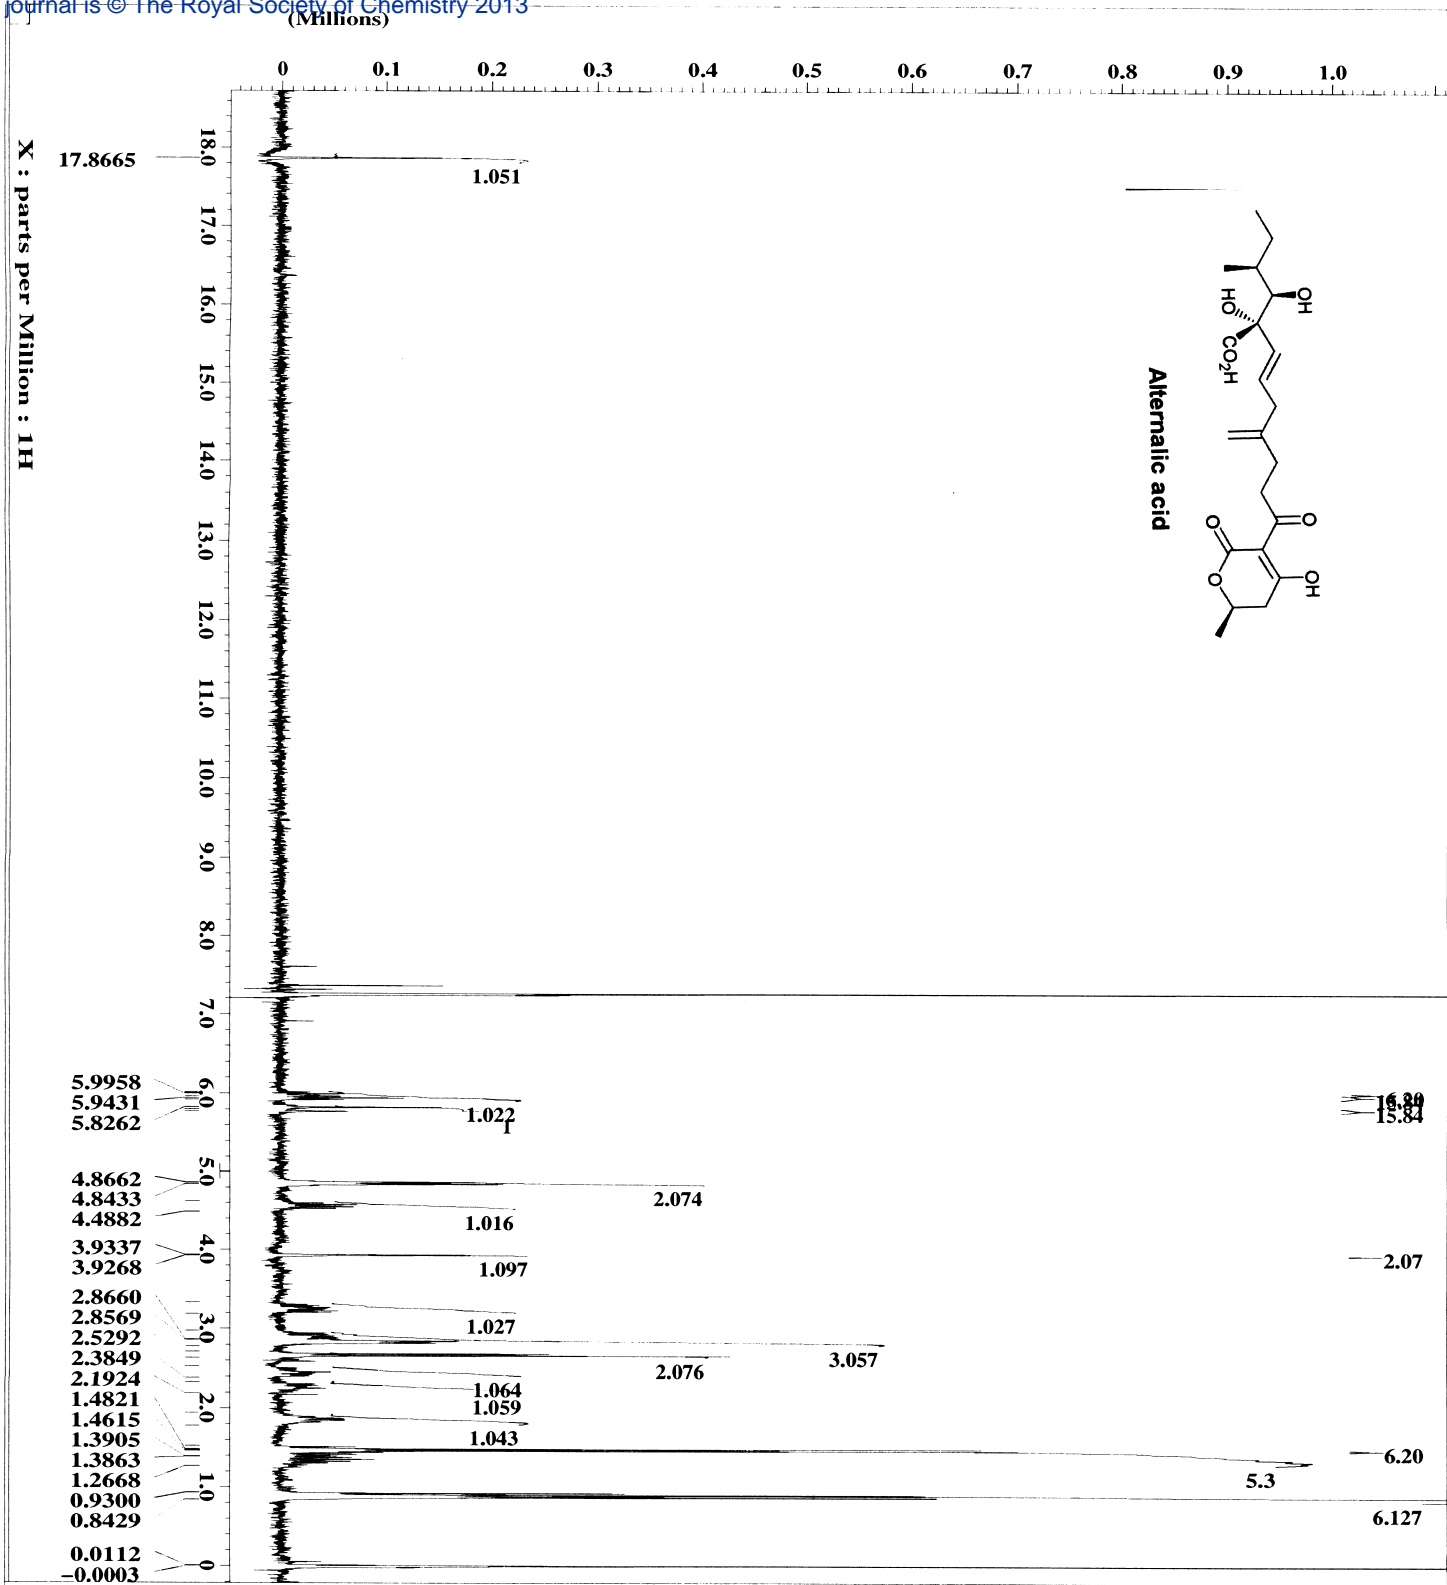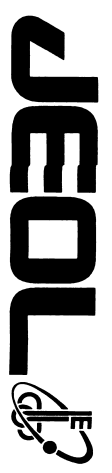

----- ACQUISITION PARAMETERS -----  
Derived from: single\_pulse.3086  
File Name = single\_pulse.3413  
Author = delta  
Sample ID = YO-962 recrystall  
Content = single\_pulse  
Creation Date = 22-JAN-2008 20:19:39  
Revision Date = 29-JAN-2008 21:07:33  
Spec Site = ECA300 (2 JMT30-2)  
Spec Type = DELTA2 NMR  
Data Format = 1D REAL  
Dimensions = X  
Dim Title = 1H  
Dim Size = 13107  
Dim Units = [ppm]  
Field\_strength = 7.0586013 [T] (300 [MHz]  
X\_acq\_duration = 1.4522776 [s]  
X\_domain = 1H  
X\_freq = 300.52965592 [MHz]  
X\_offset = 5 [ppm]  
X\_points = 16384  
X\_prescans = 0  
X\_resolutions = 0.68857351 [Hz]  
X\_sweep = 11.28158845 [kHz]  
X\_resolution = 1H  
Xir\_domain = 1H  
Xir\_freq = 300.52965592 [MHz]  
Xir\_offset = 5 [ppm]  
Xir\_domain = 1H  
Xir\_freq = 300.52965592 [MHz]  
Xir\_offset = 5 [ppm]  
Mod\_return = 1  
Scans = 8  
Total\_scans = 8  
X\_90\_width = 11.6 [us]  
X\_acq\_time = 1.4522776 [s]  
X\_angle = 45 [deg]  
X\_atn = 5.8 [dB]  
X\_pulse = 5.8 [us]  
Xir\_mode = Off  
Xir\_mode = OFF  
Dante\_presat = FALSE  
Initial\_wait = 1 [s]  
Relaxation\_delay = 5 [s]  
Repetition\_time = 6.4522776 [s]

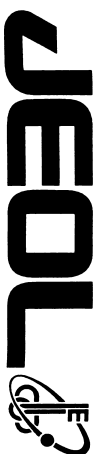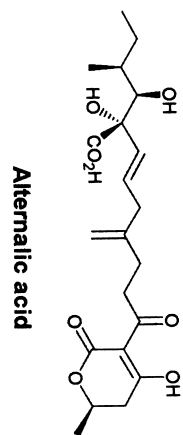

```

---- ACQUISITION PARAMETERS ----
File Name      = single_pulse_dec.219
Author         = delta
Sample ID      = Alternaric acid
Content        = single pulse decouple
Creation Date   = 12-FEB-2008 17:17:30
Revision Date   = 12-FEB-2008 17:12:32
Spec Site      = ECA300 (2 JMT30-2)

Spec Type      = DELTA2 NMR
Data Format     = 1D COMPLEX
Dimensions     = X
Dim Title      = 13C
Dim Size       = 13107
Dim Units      = [ppm]
Field Strength = 7.0586013 [T] (300 [MHz]
X_acq_duration = 0.69206016 [s]
X_domain       = 13C
X_freq         = 75.56823426 [MHz]
X_offset       = 100 [ppm]
X_points       = 16384
X_prescans     = 4
X_resolution   = 1.44496109 [Hz]
X_sweep        = 23.674242 [kHz]
X_domain       = 1H
X_freq         = 300.52965592 [MHz]
X_offset       = 5 [ppm]
Mod_return     = 1
Scans          = 1024
Total_scans    = 1024

X_90_width     = 9.4 [us]
X_acq_time     = 0.69206016 [s]
X_angle        = 30 [deg]
X_atn          = 8.6 [dB]
X_pulse        = 3.13333333 [us]
X_atn_dec      = 29.7 [dB]
X_atn_noe      = 29.7 [dB]
X_noise        = WALTZ
Decoupling     = TRUE
Initial_wait   = 1 [s]
Noe_time        = TRUE
Noe_delay      = 2 [s]
Relaxation_delay = 2 [s]
Repetition_time = 2.69206016 [s]
    
```

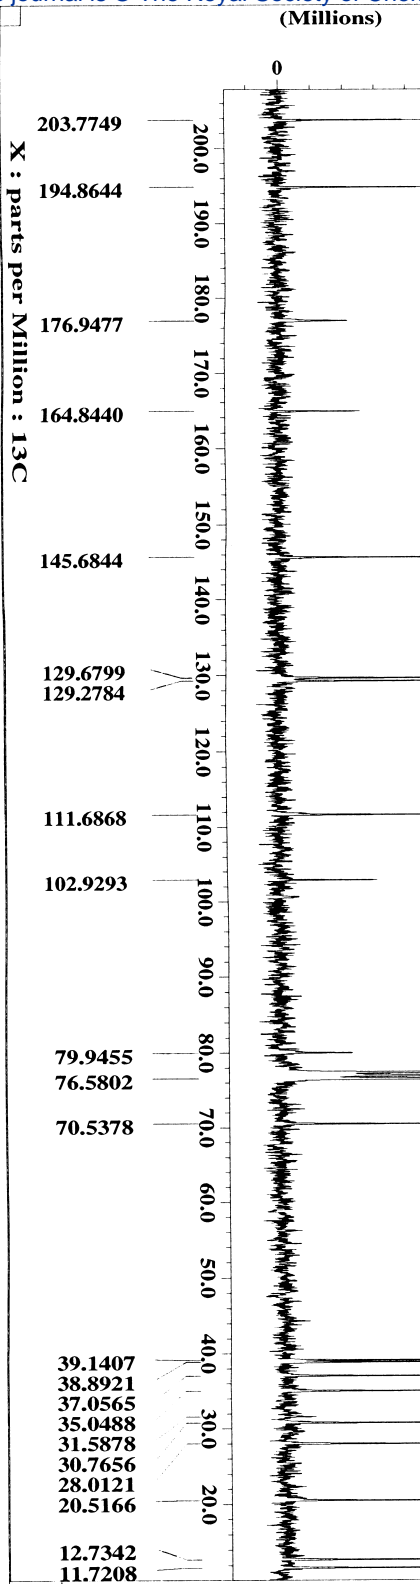

Supplement: c3cc43180k.pdf [file c3cc43180k.pdf]
